# Supplementary material for: Geometry of the magic number H+(H2O)21water cluster by proxy
Source: Royal Society of Chemistry journal article supplement (doi:10.1039/c4cp05246c), 2015-01-01
Supplement: c4cp05246c1.out [file c4cp05246c1.out]

 Entering Gaussian System, Link 0=g09
 Input=w1.gjf
 Output=w1.out
 Initial command:
 /cm/shared/apps/gaussian/g09/l1.exe /local/10967157.millipede2.cm.cluster/Gau-1638.inp -scrdir=/local/10967157.millipede2.cm.cluster/
 Entering Link 1 = /cm/shared/apps/gaussian/g09/l1.exe PID=      1639.
  
 Copyright (c) 1988,1990,1992,1993,1995,1998,2003,2009,2011,
            Gaussian, Inc.  All Rights Reserved.
  
 This is part of the Gaussian(R) 09 program.  It is based on
 the Gaussian(R) 03 system (copyright 2003, Gaussian, Inc.),
 the Gaussian(R) 98 system (copyright 1998, Gaussian, Inc.),
 the Gaussian(R) 94 system (copyright 1995, Gaussian, Inc.),
 the Gaussian 92(TM) system (copyright 1992, Gaussian, Inc.),
 the Gaussian 90(TM) system (copyright 1990, Gaussian, Inc.),
 the Gaussian 88(TM) system (copyright 1988, Gaussian, Inc.),
 the Gaussian 86(TM) system (copyright 1986, Carnegie Mellon
 University), and the Gaussian 82(TM) system (copyright 1983,
 Carnegie Mellon University). Gaussian is a federally registered
 trademark of Gaussian, Inc.
  
 This software contains proprietary and confidential information,
 including trade secrets, belonging to Gaussian, Inc.
  
 This software is provided under written license and may be
 used, copied, transmitted, or stored only in accord with that
 written license.
  
 The following legend is applicable only to US Government
 contracts under FAR:
  
                    RESTRICTED RIGHTS LEGEND
  
 Use, reproduction and disclosure by the US Government is
 subject to restrictions as set forth in subparagraphs (a)
 and (c) of the Commercial Computer Software - Restricted
 Rights clause in FAR 52.227-19.
  
 Gaussian, Inc.
 340 Quinnipiac St., Bldg. 40, Wallingford CT 06492
  
  
 ---------------------------------------------------------------
 Warning -- This program may not be used in any manner that
 competes with the business of Gaussian, Inc. or will provide
 assistance to any competitor of Gaussian, Inc.  The licensee
 of this program is prohibited from giving any competitor of
 Gaussian, Inc. access to this program.  By using this program,
 the user acknowledges that Gaussian, Inc. is engaged in the
 business of creating and licensing software in the field of
 computational chemistry and represents and warrants to the
 licensee that it is not a competitor of Gaussian, Inc. and that
 it will not use this program in any manner prohibited above.
 ---------------------------------------------------------------
  

 Cite this work as:
 Gaussian 09, Revision C.01,
 M. J. Frisch, G. W. Trucks, H. B. Schlegel, G. E. Scuseria, 
 M. A. Robb, J. R. Cheeseman, G. Scalmani, V. Barone, B. Mennucci, 
 G. A. Petersson, H. Nakatsuji, M. Caricato, X. Li, H. P. Hratchian, 
 A. F. Izmaylov, J. Bloino, G. Zheng, J. L. Sonnenberg, M. Hada, 
 M. Ehara, K. Toyota, R. Fukuda, J. Hasegawa, M. Ishida, T. Nakajima, 
 Y. Honda, O. Kitao, H. Nakai, T. Vreven, J. A. Montgomery, Jr., 
 J. E. Peralta, F. Ogliaro, M. Bearpark, J. J. Heyd, E. Brothers, 
 K. N. Kudin, V. N. Staroverov, T. Keith, R. Kobayashi, J. Normand, 
 K. Raghavachari, A. Rendell, J. C. Burant, S. S. Iyengar, J. Tomasi, 
 M. Cossi, N. Rega, J. M. Millam, M. Klene, J. E. Knox, J. B. Cross, 
 V. Bakken, C. Adamo, J. Jaramillo, R. Gomperts, R. E. Stratmann, 
 O. Yazyev, A. J. Austin, R. Cammi, C. Pomelli, J. W. Ochterski, 
 R. L. Martin, K. Morokuma, V. G. Zakrzewski, G. A. Voth, 
 P. Salvador, J. J. Dannenberg, S. Dapprich, A. D. Daniels, 
 O. Farkas, J. B. Foresman, J. V. Ortiz, J. Cioslowski, 
 and D. J. Fox, Gaussian, Inc., Wallingford CT, 2010.
 
 ******************************************
 Gaussian 09:  AM64L-G09RevC.01 23-Sep-2011
                27-Jun-2014 
 ******************************************
 %chk=w1
 %mem=2GB
 %nprocshared=12
 Will use up to   12 processors via shared memory.
 ------------------
 # sp b3lyp/6-31+g*
 ------------------
 1/38=1/1;
 2/12=2,17=6,18=5,40=1/2;
 3/5=1,6=6,7=11,11=2,16=1,25=1,30=1,74=-5/1,2,3;
 4//1;
 5/5=2,38=5/2;
 6/7=2,8=2,9=2,10=2,28=1/1;
 99/5=1,9=1/99;
 ---------
 something
 ---------
 Charge =  1 Multiplicity = 1
 Symbolic Z-Matrix:
 H                    -2.56307  -2.14399  -0.62428 
 H                    -2.33813  -2.16272  -2.17406 
 H                     0.02118   0.11404  -1.70258 
 H                     0.88358   0.44828  -2.97546 
 H                     0.27658  -4.70329   1.24196 
 H                    -0.36329  -3.25346   1.03379 
 H                    -0.45046   2.55887   1.85084 
 H                    -0.89305   3.04164   0.38677 
 H                    -0.97537  -1.28037   0.57195 
 H                    -2.00487  -1.8218    1.63988 
 H                    -0.6351    4.78352  -1.30858 
 H                     0.40939   3.58209  -1.24404 
 H                     2.28562   2.28601  -1.7658 
 H                     2.35297   2.82302  -0.28137 
 H                     0.58863  -0.87767   3.45798 
 H                     0.28311   0.67603   3.56159 
 H                    -1.34281   1.35628  -2.80735 
 H                    -1.68215   2.71608  -2.11262 
 H                     4.20105  -1.88539  -1.66147 
 H                     2.62416  -2.11337  -1.57341 
 H                     1.39389  -2.8614    2.26973 
 H                     2.37816  -2.57271   3.48014 
 H                    -3.3157    0.404     1.87754 
 H                    -2.64512   1.67665   1.25663 
 H                     3.04126   0.01757  -2.47557 
 H                     3.18528   1.04049  -3.68014 
 H                    -0.34413   0.88416   0.39951 
 H                     0.92591  -0.07924   0.35193 
 H                     1.11454  -3.46309  -0.65055 
 H                     0.63563  -3.01511  -2.10096 
 H                     0.88763   3.03255   3.87206 
 H                     1.6828    2.46699   2.6207 
 H                     3.8621    2.55503   1.62296 
 H                     3.00053   1.26555   1.27065 
 H                    -0.83883  -2.71243  -4.01462 
 H                    -0.46542  -1.42139  -3.1555 
 H                    -3.12474  -1.17013   3.7549 
 H                    -1.69575  -0.57271   3.37921 
 H                     3.02797  -0.77135   0.10027 
 H                     2.51055  -1.02419   1.59813 
 H                    -3.13981   1.12234  -1.78668 
 H                    -3.49203  -0.48434  -1.41318 
 H                    -3.70031   0.71814  -0.25259 
 O                    -3.00176  -1.93855  -1.48352 
 O                    -0.0137    0.15712  -2.69593 
 O                     0.49693  -3.77156   1.08277 
 O                    -0.99653   2.32878   1.06517 
 O                    -1.50946  -2.08181   0.82449 
 O                    -0.55565   3.83127  -1.14231 
 O                     1.97638   2.99927  -1.16862 
 O                    -0.09014  -0.2181    3.71003 
 O                    -2.09501   1.94498  -2.56219 
 O                     3.36403  -1.42125  -1.50024 
 O                     1.83851  -2.14418   2.79704 
 O                    -3.45114   1.11131   1.20819 
 O                     2.66452   0.83789  -2.88702 
 O                     0.00012   0.02896   0.02255 
 O                     1.42639  -3.1724   -1.53511 
 O                     0.83139   2.4155    3.12541 
 O                     2.96438   2.25053   1.41596 
 O                    -0.75095  -2.37542  -3.10913 
 O                    -2.58156  -0.86117   3.01323 
 O                     2.60189  -0.34452   0.88615 
 O                    -3.77852   0.4997   -1.26225 
 
 Stoichiometry    H43O21(1+)
 Framework group  C1[X(H43O21)]
 Deg. of freedom   186
 Full point group                 C1      NOp   1
 Largest Abelian subgroup         C1      NOp   1
 Largest concise Abelian subgroup C1      NOp   1
                         Standard orientation:                         
 ---------------------------------------------------------------------
 Center     Atomic      Atomic             Coordinates (Angstroms)
 Number     Number       Type             X           Y           Z
 ---------------------------------------------------------------------
      1          1           0       -2.343377   -2.404834   -0.534191
      2          1           0       -2.122981   -2.455334   -2.083913
      3          1           0        0.002604    0.057043   -1.706926
      4          1           0        0.823603    0.429804   -2.996376
      5          1           0        0.740537   -4.606517    1.399343
      6          1           0       -0.039511   -3.234626    1.145925
      7          1           0       -0.695014    2.565983    1.763660
      8          1           0       -1.187926    2.951718    0.286943
      9          1           0       -0.844218   -1.348423    0.620846
     10          1           0       -1.811832   -1.950784    1.713724
     11          1           0       -1.108311    4.650425   -1.468890
     12          1           0        0.049472    3.560299   -1.370296
     13          1           0        2.042265    2.437269   -1.860069
     14          1           0        2.061553    3.029646   -0.395433
     15          1           0        0.682455   -0.693921    3.480629
     16          1           0        0.225992    0.824938    3.532956
     17          1           0       -1.480693    1.120181   -2.844334
     18          1           0       -1.949728    2.463463   -2.194367
     19          1           0        4.358948   -1.519802   -1.625756
     20          1           0        2.812429   -1.898259   -1.519172
     21          1           0        1.674816   -2.629192    2.355671
     22          1           0        2.630057   -2.203322    3.548723
     23          1           0       -3.334362    0.142516    1.883817
     24          1           0       -2.794302    1.452454    1.215051
     25          1           0        3.014878    0.230628   -2.496733
     26          1           0        3.053496    1.220188   -3.736643
     27          1           0       -0.429475    0.860294    0.369952
     28          1           0        0.928974    0.025140    0.346786
     29          1           0        1.446011   -3.356692   -0.540272
     30          1           0        0.920414   -3.008649   -2.001898
     31          1           0        0.596912    3.238794    3.758265
     32          1           0        1.439560    2.710798    2.521650
     33          1           0        3.596219    2.977539    1.506634
     34          1           0        2.864426    1.598237    1.204656
     35          1           0       -0.583185   -2.918961   -3.914714
     36          1           0       -0.335614   -1.568382   -3.102960
     37          1           0       -2.983124   -1.338952    3.812731
     38          1           0       -1.621098   -0.617598    3.407027
     39          1           0        3.088031   -0.465635    0.104682
     40          1           0        2.603102   -0.715745    1.613835
     41          1           0       -3.242482    0.746657   -1.804005
     42          1           0       -3.433725   -0.872857   -1.373209
     43          1           0       -3.755274    0.343047   -0.253166
     44          8           0       -2.803075   -2.273483   -1.396959
     45          8           0       -0.039734    0.061882   -2.700908
     46          8           0        0.867650   -3.663767    1.206782
     47          8           0       -1.218488    2.256194    0.990089
     48          8           0       -1.296044   -2.189138    0.904377
     49          8           0       -0.935042    3.716940   -1.270594
     50          8           0        1.666428    3.137085   -1.285615
     51          8           0       -0.057021   -0.095799    3.714527
     52          8           0       -2.286295    1.640380   -2.614390
     53          8           0        3.480900   -1.134732   -1.474839
     54          8           0        2.048553   -1.853873    2.855020
     55          8           0       -3.540984    0.809386    1.191534
     56          8           0        2.557895    0.995182   -2.933505
     57          8           0       -0.004088    0.030416    0.020207
     58          8           0        1.724741   -3.067766   -1.436392
     59          8           0        0.599072    2.593586    3.033625
     60          8           0        2.732090    2.579371    1.316331
     61          8           0       -0.525786   -2.543637   -3.021940
     62          8           0       -2.475495   -1.004174    3.057210
     63          8           0        2.624731   -0.055591    0.878346
     64          8           0       -3.815074    0.082964   -1.254178
 ---------------------------------------------------------------------
 Rotational constants (GHZ):      0.1516781      0.1498084      0.1490598
 Standard basis: 6-31+G(d) (6D, 7F)
 There are   485 symmetry adapted basis functions of A   symmetry.
 Integral buffers will be    131072 words long.
 Raffenetti 2 integral format.
 Two-electron integral symmetry is turned on.
   485 basis functions,   844 primitive gaussians,   485 cartesian basis functions
   105 alpha electrons      105 beta electrons
       nuclear repulsion energy      2671.2171215239 Hartrees.
 NAtoms=   64 NActive=   64 NUniq=   64 SFac= 1.00D+00 NAtFMM=   60 NAOKFM=T Big=T
 One-electron integrals computed using PRISM.
 NBasis=   485 RedAO= T  NBF=   485
 NBsUse=   485 1.00D-06 NBFU=   485
 Harris functional with IExCor=  402 diagonalized for initial guess.
 ExpMin= 8.45D-02 ExpMax= 5.48D+03 ExpMxC= 8.25D+02 IAcc=2 IRadAn=         4 AccDes= 0.00D+00
 HarFok:  IExCor=  402 AccDes= 0.00D+00 IRadAn=         4 IDoV= 1
 ScaDFX=  1.000000  1.000000  1.000000  1.000000
 FoFCou: FMM=F IPFlag=           0 FMFlag=      100000 FMFlg1=        2001
         NFxFlg=           0 DoJE=T BraDBF=F KetDBF=T FulRan=T
         Omega=  0.000000  0.000000  1.000000  0.000000  0.000000 ICntrl=     500 IOpCl=  0
         NMat0=    1 NMatS0=    1 NMatT0=    0 NMatD0=    1 NMtDS0=    0 NMtDT0=    0
         I1Cent=           4 NGrid=           0.
 Petite list used in FoFCou.
 Initial guess orbital symmetries:
       Occupied  (A) (A) (A) (A) (A) (A) (A) (A) (A) (A) (A) (A)
                 (A) (A) (A) (A) (A) (A) (A) (A) (A) (A) (A) (A)
                 (A) (A) (A) (A) (A) (A) (A) (A) (A) (A) (A) (A)
                 (A) (A) (A) (A) (A) (A) (A) (A) (A) (A) (A) (A)
                 (A) (A) (A) (A) (A) (A) (A) (A) (A) (A) (A) (A)
                 (A) (A) (A) (A) (A) (A) (A) (A) (A) (A) (A) (A)
                 (A) (A) (A) (A) (A) (A) (A) (A) (A) (A) (A) (A)
                 (A) (A) (A) (A) (A) (A) (A) (A) (A) (A) (A) (A)
                 (A) (A) (A) (A) (A) (A) (A) (A) (A)
       Virtual   (A) (A) (A) (A) (A) (A) (A) (A) (A) (A) (A) (A)
                 (A) (A) (A) (A) (A) (A) (A) (A) (A) (A) (A) (A)
                 (A) (A) (A) (A) (A) (A) (A) (A) (A) (A) (A) (A)
                 (A) (A) (A) (A) (A) (A) (A) (A) (A) (A) (A) (A)
                 (A) (A) (A) (A) (A) (A) (A) (A) (A) (A) (A) (A)
                 (A) (A) (A) (A) (A) (A) (A) (A) (A) (A) (A) (A)
                 (A) (A) (A) (A) (A) (A) (A) (A) (A) (A) (A) (A)
                 (A) (A) (A) (A) (A) (A) (A) (A) (A) (A) (A) (A)
                 (A) (A) (A) (A) (A) (A) (A) (A) (A) (A) (A) (A)
                 (A) (A) (A) (A) (A) (A) (A) (A) (A) (A) (A) (A)
                 (A) (A) (A) (A) (A) (A) (A) (A) (A) (A) (A) (A)
                 (A) (A) (A) (A) (A) (A) (A) (A) (A) (A) (A) (A)
                 (A) (A) (A) (A) (A) (A) (A) (A) (A) (A) (A) (A)
                 (A) (A) (A) (A) (A) (A) (A) (A) (A) (A) (A) (A)
                 (A) (A) (A) (A) (A) (A) (A) (A) (A) (A) (A) (A)
                 (A) (A) (A) (A) (A) (A) (A) (A) (A) (A) (A) (A)
                 (A) (A) (A) (A) (A) (A) (A) (A) (A) (A) (A) (A)
                 (A) (A) (A) (A) (A) (A) (A) (A) (A) (A) (A) (A)
                 (A) (A) (A) (A) (A) (A) (A) (A) (A) (A) (A) (A)
                 (A) (A) (A) (A) (A) (A) (A) (A) (A) (A) (A) (A)
                 (A) (A) (A) (A) (A) (A) (A) (A) (A) (A) (A) (A)
                 (A) (A) (A) (A) (A) (A) (A) (A) (A) (A) (A) (A)
                 (A) (A) (A) (A) (A) (A) (A) (A) (A) (A) (A) (A)
                 (A) (A) (A) (A) (A) (A) (A) (A) (A) (A) (A) (A)
                 (A) (A) (A) (A) (A) (A) (A) (A) (A) (A) (A) (A)
                 (A) (A) (A) (A) (A) (A) (A) (A) (A) (A) (A) (A)
                 (A) (A) (A) (A) (A) (A) (A) (A) (A) (A) (A) (A)
                 (A) (A) (A) (A) (A) (A) (A) (A) (A) (A) (A) (A)
                 (A) (A) (A) (A) (A) (A) (A) (A) (A) (A) (A) (A)
                 (A) (A) (A) (A) (A) (A) (A) (A) (A) (A) (A) (A)
                 (A) (A) (A) (A) (A) (A) (A) (A) (A) (A) (A) (A)
                 (A) (A) (A) (A) (A) (A) (A) (A)
 The electronic state of the initial guess is 1-A.
 Requested convergence on RMS density matrix=1.00D-08 within 128 cycles.
 Requested convergence on MAX density matrix=1.00D-06.
 Requested convergence on             energy=1.00D-06.
 No special actions if energy rises.
 Integral accuracy reduced to 1.0D-05 until final iterations.
 Initial convergence to 1.0D-05 achieved.  Increase integral accuracy.
 SCF Done:  E(RB3LYP) =  -1605.67531357     A.U. after   13 cycles
             Convg  =    0.2622D-08             -V/T =  2.0092

 **********************************************************************

            Population analysis using the SCF density.

 **********************************************************************

 Orbital symmetries:
       Occupied  (A) (A) (A) (A) (A) (A) (A) (A) (A) (A) (A) (A)
                 (A) (A) (A) (A) (A) (A) (A) (A) (A) (A) (A) (A)
                 (A) (A) (A) (A) (A) (A) (A) (A) (A) (A) (A) (A)
                 (A) (A) (A) (A) (A) (A) (A) (A) (A) (A) (A) (A)
                 (A) (A) (A) (A) (A) (A) (A) (A) (A) (A) (A) (A)
                 (A) (A) (A) (A) (A) (A) (A) (A) (A) (A) (A) (A)
                 (A) (A) (A) (A) (A) (A) (A) (A) (A) (A) (A) (A)
                 (A) (A) (A) (A) (A) (A) (A) (A) (A) (A) (A) (A)
                 (A) (A) (A) (A) (A) (A) (A) (A) (A)
       Virtual   (A) (A) (A) (A) (A) (A) (A) (A) (A) (A) (A) (A)
                 (A) (A) (A) (A) (A) (A) (A) (A) (A) (A) (A) (A)
                 (A) (A) (A) (A) (A) (A) (A) (A) (A) (A) (A) (A)
                 (A) (A) (A) (A) (A) (A) (A) (A) (A) (A) (A) (A)
                 (A) (A) (A) (A) (A) (A) (A) (A) (A) (A) (A) (A)
                 (A) (A) (A) (A) (A) (A) (A) (A) (A) (A) (A) (A)
                 (A) (A) (A) (A) (A) (A) (A) (A) (A) (A) (A) (A)
                 (A) (A) (A) (A) (A) (A) (A) (A) (A) (A) (A) (A)
                 (A) (A) (A) (A) (A) (A) (A) (A) (A) (A) (A) (A)
                 (A) (A) (A) (A) (A) (A) (A) (A) (A) (A) (A) (A)
                 (A) (A) (A) (A) (A) (A) (A) (A) (A) (A) (A) (A)
                 (A) (A) (A) (A) (A) (A) (A) (A) (A) (A) (A) (A)
                 (A) (A) (A) (A) (A) (A) (A) (A) (A) (A) (A) (A)
                 (A) (A) (A) (A) (A) (A) (A) (A) (A) (A) (A) (A)
                 (A) (A) (A) (A) (A) (A) (A) (A) (A) (A) (A) (A)
                 (A) (A) (A) (A) (A) (A) (A) (A) (A) (A) (A) (A)
                 (A) (A) (A) (A) (A) (A) (A) (A) (A) (A) (A) (A)
                 (A) (A) (A) (A) (A) (A) (A) (A) (A) (A) (A) (A)
                 (A) (A) (A) (A) (A) (A) (A) (A) (A) (A) (A) (A)
                 (A) (A) (A) (A) (A) (A) (A) (A) (A) (A) (A) (A)
                 (A) (A) (A) (A) (A) (A) (A) (A) (A) (A) (A) (A)
                 (A) (A) (A) (A) (A) (A) (A) (A) (A) (A) (A) (A)
                 (A) (A) (A) (A) (A) (A) (A) (A) (A) (A) (A) (A)
                 (A) (A) (A) (A) (A) (A) (A) (A) (A) (A) (A) (A)
                 (A) (A) (A) (A) (A) (A) (A) (A) (A) (A) (A) (A)
                 (A) (A) (A) (A) (A) (A) (A) (A) (A) (A) (A) (A)
                 (A) (A) (A) (A) (A) (A) (A) (A) (A) (A) (A) (A)
                 (A) (A) (A) (A) (A) (A) (A) (A) (A) (A) (A) (A)
                 (A) (A) (A) (A) (A) (A) (A) (A) (A) (A) (A) (A)
                 (A) (A) (A) (A) (A) (A) (A) (A) (A) (A) (A) (A)
                 (A) (A) (A) (A) (A) (A) (A) (A) (A) (A) (A) (A)
                 (A) (A) (A) (A) (A) (A) (A) (A)
 The electronic state is 1-A.
 Alpha  occ. eigenvalues --  -19.29569 -19.29558 -19.29407 -19.29207 -19.29074
 Alpha  occ. eigenvalues --  -19.29001 -19.28874 -19.28430 -19.27636 -19.27400
 Alpha  occ. eigenvalues --  -19.27389 -19.27132 -19.26845 -19.26819 -19.26744
 Alpha  occ. eigenvalues --  -19.25676 -19.25540 -19.25446 -19.24970 -19.24951
 Alpha  occ. eigenvalues --  -19.24928  -1.16489  -1.15758  -1.15222  -1.14967
 Alpha  occ. eigenvalues --   -1.14339  -1.14013  -1.13871  -1.13789  -1.13344
 Alpha  occ. eigenvalues --   -1.13140  -1.12924  -1.12263  -1.11874  -1.11823
 Alpha  occ. eigenvalues --   -1.10922  -1.10475  -1.10403  -1.10260  -1.09963
 Alpha  occ. eigenvalues --   -1.09938  -1.09560  -0.68049  -0.67964  -0.67490
 Alpha  occ. eigenvalues --   -0.66863  -0.66765  -0.66524  -0.66492  -0.66411
 Alpha  occ. eigenvalues --   -0.66047  -0.66022  -0.65949  -0.65509  -0.65217
 Alpha  occ. eigenvalues --   -0.64725  -0.64593  -0.64320  -0.63921  -0.63800
 Alpha  occ. eigenvalues --   -0.63770  -0.62869  -0.62577  -0.62540  -0.56134
 Alpha  occ. eigenvalues --   -0.55667  -0.55403  -0.55182  -0.54601  -0.54351
 Alpha  occ. eigenvalues --   -0.54028  -0.52761  -0.52120  -0.51820  -0.51676
 Alpha  occ. eigenvalues --   -0.50502  -0.50221  -0.50141  -0.49618  -0.49333
 Alpha  occ. eigenvalues --   -0.49057  -0.48456  -0.47797  -0.47643  -0.46496
 Alpha  occ. eigenvalues --   -0.45346  -0.45315  -0.45133  -0.44771  -0.44656
 Alpha  occ. eigenvalues --   -0.44587  -0.44452  -0.43941  -0.43635  -0.43505
 Alpha  occ. eigenvalues --   -0.43364  -0.43026  -0.42850  -0.42647  -0.41879
 Alpha  occ. eigenvalues --   -0.41577  -0.41443  -0.41119  -0.41050  -0.40886
 Alpha virt. eigenvalues --   -0.12206  -0.09415  -0.09362  -0.08180  -0.06427
 Alpha virt. eigenvalues --   -0.06260  -0.05555  -0.05374  -0.05173  -0.03164
 Alpha virt. eigenvalues --   -0.01956  -0.01272  -0.01095  -0.00497  -0.00187
 Alpha virt. eigenvalues --   -0.00008   0.01116   0.01577   0.01850   0.02159
 Alpha virt. eigenvalues --    0.02522   0.02781   0.02901   0.03803   0.04173
 Alpha virt. eigenvalues --    0.04331   0.05331   0.05404   0.05579   0.06101
 Alpha virt. eigenvalues --    0.06258   0.06698   0.06811   0.07193   0.07760
 Alpha virt. eigenvalues --    0.08580   0.08822   0.09072   0.09489   0.09687
 Alpha virt. eigenvalues --    0.09813   0.10089   0.10473   0.10578   0.10832
 Alpha virt. eigenvalues --    0.11031   0.11141   0.11322   0.11465   0.11799
 Alpha virt. eigenvalues --    0.11884   0.12373   0.13128   0.13413   0.13769
 Alpha virt. eigenvalues --    0.14019   0.14445   0.14506   0.14606   0.14987
 Alpha virt. eigenvalues --    0.15237   0.15537   0.15617   0.15790   0.16234
 Alpha virt. eigenvalues --    0.16308   0.16459   0.16720   0.16970   0.17199
 Alpha virt. eigenvalues --    0.17428   0.17598   0.17780   0.17905   0.18101
 Alpha virt. eigenvalues --    0.18243   0.18293   0.18436   0.18835   0.18931
 Alpha virt. eigenvalues --    0.19242   0.19409   0.19483   0.19638   0.19893
 Alpha virt. eigenvalues --    0.20156   0.20788   0.21338   0.21454   0.21672
 Alpha virt. eigenvalues --    0.21902   0.22225   0.23221   0.23548   0.23897
 Alpha virt. eigenvalues --    0.24590   0.24854   0.25266   0.25649   0.26428
 Alpha virt. eigenvalues --    0.27128   0.27329   0.28042   0.28363   0.29305
 Alpha virt. eigenvalues --    0.29441   0.30268   0.34408   0.34960   0.35195
 Alpha virt. eigenvalues --    0.35571   0.35925   0.36507   0.39076   0.40710
 Alpha virt. eigenvalues --    0.40971   0.42005   0.42268   0.42728   0.44022
 Alpha virt. eigenvalues --    0.44352   0.45878   0.46367   0.48864   0.49507
 Alpha virt. eigenvalues --    0.50974   0.55591   0.86125   0.86421   0.86957
 Alpha virt. eigenvalues --    0.89157   0.89892   0.90722   0.91360   0.92024
 Alpha virt. eigenvalues --    0.92930   0.93313   0.93437   0.93659   0.94477
 Alpha virt. eigenvalues --    0.94658   0.95537   0.95895   0.96862   0.97644
 Alpha virt. eigenvalues --    0.97985   0.98221   0.98929   0.99334   0.99884
 Alpha virt. eigenvalues --    1.00172   1.00258   1.01168   1.01645   1.01750
 Alpha virt. eigenvalues --    1.02296   1.02478   1.02837   1.03311   1.03792
 Alpha virt. eigenvalues --    1.03978   1.04382   1.04692   1.05087   1.05491
 Alpha virt. eigenvalues --    1.05615   1.05941   1.06032   1.06279   1.06551
 Alpha virt. eigenvalues --    1.07336   1.07373   1.07912   1.08341   1.08571
 Alpha virt. eigenvalues --    1.09267   1.09326   1.09578   1.09793   1.09944
 Alpha virt. eigenvalues --    1.10781   1.11001   1.11467   1.11767   1.11840
 Alpha virt. eigenvalues --    1.12271   1.12847   1.13166   1.13800   1.14057
 Alpha virt. eigenvalues --    1.14501   1.14746   1.14948   1.15406   1.15563
 Alpha virt. eigenvalues --    1.15963   1.16262   1.16440   1.16634   1.16934
 Alpha virt. eigenvalues --    1.17441   1.17829   1.18042   1.18604   1.19101
 Alpha virt. eigenvalues --    1.19567   1.20116   1.20176   1.20424   1.20743
 Alpha virt. eigenvalues --    1.21128   1.21273   1.21397   1.21829   1.23132
 Alpha virt. eigenvalues --    1.23299   1.23538   1.23804   1.24249   1.24583
 Alpha virt. eigenvalues --    1.25249   1.25560   1.25988   1.26553   1.27039
 Alpha virt. eigenvalues --    1.27953   1.28301   1.29077   1.30653   1.31393
 Alpha virt. eigenvalues --    1.31831   1.34513   1.37336   1.45482   1.46082
 Alpha virt. eigenvalues --    1.47392   1.48263   1.49612   1.49658   1.50467
 Alpha virt. eigenvalues --    1.51166   1.51687   1.52778   1.53713   1.54416
 Alpha virt. eigenvalues --    1.55503   1.55695   1.56356   1.56670   1.57569
 Alpha virt. eigenvalues --    1.58480   1.59329   1.59478   1.59944   1.60185
 Alpha virt. eigenvalues --    1.60443   1.60761   1.61181   1.61703   1.61808
 Alpha virt. eigenvalues --    1.61875   1.62051   1.62296   1.62469   1.62524
 Alpha virt. eigenvalues --    1.62793   1.63260   1.63365   1.63889   1.64243
 Alpha virt. eigenvalues --    1.64405   1.64923   1.65126   1.65461   1.66463
 Alpha virt. eigenvalues --    1.66852   1.67507   1.68151   1.68619   1.68871
 Alpha virt. eigenvalues --    1.69548   1.69793   1.70243   1.70545   1.71137
 Alpha virt. eigenvalues --    1.71900   1.72081   1.72619   1.73009   1.73866
 Alpha virt. eigenvalues --    1.74500   1.74726   1.75906   1.76295   1.77552
 Alpha virt. eigenvalues --    1.79635   1.81360   1.82439   1.83196   1.83660
 Alpha virt. eigenvalues --    1.84389   1.85327   1.85596   1.86167   1.86746
 Alpha virt. eigenvalues --    1.87149   1.87689   1.88056   1.88328   1.88743
 Alpha virt. eigenvalues --    1.89802   1.90969   1.91632   1.93342   1.96612
 Alpha virt. eigenvalues --    2.04642   2.23365   2.25400   2.26381   2.28828
 Alpha virt. eigenvalues --    2.29234   2.29799   2.30226   2.31997   2.32586
 Alpha virt. eigenvalues --    2.33361   2.33842   2.34814   2.35596   2.38447
 Alpha virt. eigenvalues --    2.38924   2.39748   2.41227   2.41712   2.42335
 Alpha virt. eigenvalues --    2.47983   2.49789   2.54326   2.54382   2.55254
 Alpha virt. eigenvalues --    2.55468   2.56116   2.56535   2.57629   2.58042
 Alpha virt. eigenvalues --    2.58239   2.58875   2.59199   2.59514   2.59622
 Alpha virt. eigenvalues --    2.59782   2.60103   2.60958   2.61677   2.61785
 Alpha virt. eigenvalues --    2.63092   2.64815   2.67001   2.67472   4.01771
 Alpha virt. eigenvalues --    4.02533   4.04071   4.05137   4.07264   4.07652
 Alpha virt. eigenvalues --    4.09277   4.10183   4.11714   4.11896   4.12667
 Alpha virt. eigenvalues --    4.14183   4.14317   4.21823   4.23871   4.24628
 Alpha virt. eigenvalues --    4.27733   4.28749   4.29157   4.40715   4.57383
          Condensed to atoms (all electrons):
 Mulliken atomic charges:
              1
     1  H    0.606881
     2  H    0.585127
     3  H    0.684129
     4  H    0.619313
     5  H    0.524023
     6  H    0.632102
     7  H    0.607591
     8  H    0.615083
     9  H    0.690039
    10  H    0.636493
    11  H    0.519548
    12  H    0.611838
    13  H    0.592800
    14  H    0.590666
    15  H    0.596818
    16  H    0.598088
    17  H    0.602355
    18  H    0.592246
    19  H    0.520611
    20  H    0.623407
    21  H    0.595344
    22  H    0.519677
    23  H    0.593102
    24  H    0.600595
    25  H    0.597404
    26  H    0.518254
    27  H    0.701891
    28  H    0.689071
    29  H    0.592840
    30  H    0.594140
    31  H    0.520233
    32  H    0.590352
    33  H    0.523119
    34  H    0.618568
    35  H    0.521164
    36  H    0.624574
    37  H    0.518889
    38  H    0.611043
    39  H    0.626433
    40  H    0.620723
    41  H    0.643101
    42  H    0.641369
    43  H    0.642152
    44  O   -1.125601
    45  O   -1.299340
    46  O   -1.168970
    47  O   -1.255450
    48  O   -1.326404
    49  O   -1.154937
    50  O   -1.121351
    51  O   -1.126502
    52  O   -1.124977
    53  O   -1.170999
    54  O   -1.139799
    55  O   -1.117848
    56  O   -1.139419
    57  O   -1.357260
    58  O   -1.122356
    59  O   -1.134096
    60  O   -1.156737
    61  O   -1.161447
    62  O   -1.164533
    63  O   -1.278526
    64  O   -1.106645
 Sum of Mulliken atomic charges =   1.00000
 Mulliken charges with hydrogens summed into heavy atoms:
              1
    44  O    0.066407
    45  O    0.004102
    46  O   -0.012845
    47  O   -0.032776
    48  O    0.000128
    49  O   -0.023551
    50  O    0.062115
    51  O    0.068404
    52  O    0.069624
    53  O   -0.026982
    54  O   -0.024779
    55  O    0.075849
    56  O   -0.023760
    57  O    0.033703
    58  O    0.064624
    59  O   -0.023511
    60  O   -0.015050
    61  O   -0.015709
    62  O   -0.034600
    63  O   -0.031371
    64  O    0.819977
 Sum of Mulliken charges with hydrogens summed into heavy atoms =   1.00000
 Electronic spatial extent (au):  <R**2>=          10319.3008
 Charge=              1.0000 electrons
 Dipole moment (field-independent basis, Debye):
    X=              9.5739    Y=             -0.3153    Z=              3.1515  Tot=             10.0842
 Quadrupole moment (field-independent basis, Debye-Ang):
   XX=           -108.1857   YY=            -88.1665   ZZ=            -87.8446
   XY=              1.8758   XZ=             -6.6896   YZ=             -0.0886
 Traceless Quadrupole moment (field-independent basis, Debye-Ang):
   XX=            -13.4534   YY=              6.5658   ZZ=              6.8877
   XY=              1.8758   XZ=             -6.6896   YZ=             -0.0886
 Octapole moment (field-independent basis, Debye-Ang**2):
  XXX=            225.3532  YYY=             30.9736  ZZZ=              0.9546  XYY=             30.0454
  XXY=             -2.8375  XXZ=             35.4382  XZZ=             69.3185  YZZ=            -31.4180
  YYZ=             75.5888  XYZ=             13.5435
 Hexadecapole moment (field-independent basis, Debye-Ang**3):
 XXXX=          -3507.3077 YYYY=          -2792.5665 ZZZZ=          -2988.7634 XXXY=             60.1577
 XXXZ=           -237.7954 YYYX=           -128.5864 YYYZ=            -98.7080 ZZZX=           -207.3995
 ZZZY=            162.5122 XXYY=          -1170.6299 XXZZ=           -912.2009 YYZZ=           -807.6786
 XXYZ=            -75.0429 YYXZ=            175.0584 ZZXY=            126.2864
 N-N= 2.671217121524D+03 E-N=-9.106591070170D+03  KE= 1.591099597865D+03
 1\1\GINC-NODE039\SP\RB3LYP\6-31+G(d)\H43O21(1+)\P253081\27-Jun-2014\0\
 \# sp b3lyp/6-31+g*\\something\\1,1\H,0,-2.56307,-2.14399,-0.624282\H,
 0,-2.33813,-2.16272,-2.17406\H,0,0.0211769,0.114043,-1.70258\H,0,0.883
 576,0.448283,-2.97546\H,0,0.27658,-4.70329,1.24196\H,0,-0.363294,-3.25
 346,1.03379\H,0,-0.45046,2.55887,1.85084\H,0,-0.893045,3.04164,0.38677
 1\H,0,-0.975371,-1.28037,0.571946\H,0,-2.00487,-1.8218,1.63988\H,0,-0.
 635099,4.78352,-1.30858\H,0,0.40939,3.58209,-1.24404\H,0,2.28562,2.286
 01,-1.7658\H,0,2.35297,2.82302,-0.281373\H,0,0.588631,-0.877665,3.4579
 8\H,0,0.283113,0.676025,3.56159\H,0,-1.34281,1.35628,-2.80735\H,0,-1.6
 8215,2.71608,-2.11262\H,0,4.20105,-1.88539,-1.66147\H,0,2.62416,-2.113
 37,-1.57341\H,0,1.39389,-2.8614,2.26973\H,0,2.37816,-2.57271,3.48014\H
 ,0,-3.3157,0.403998,1.87754\H,0,-2.64512,1.67665,1.25663\H,0,3.04126,0
 .0175705,-2.47557\H,0,3.18528,1.04049,-3.68014\H,0,-0.344128,0.88416,0
 .399513\H,0,0.925911,-0.07924,0.351929\H,0,1.11454,-3.46309,-0.650549\
 H,0,0.635626,-3.01511,-2.10096\H,0,0.887633,3.03255,3.87206\H,0,1.6828
 ,2.46699,2.6207\H,0,3.8621,2.55503,1.62296\H,0,3.00053,1.26555,1.27065
 \H,0,-0.838826,-2.71243,-4.01462\H,0,-0.465424,-1.42139,-3.1555\H,0,-3
 .12474,-1.17013,3.7549\H,0,-1.69575,-0.572714,3.37921\H,0,3.02797,-0.7
 71349,0.100265\H,0,2.51055,-1.02419,1.59813\H,0,-3.13981,1.12234,-1.78
 668\H,0,-3.49203,-0.484341,-1.41318\H,0,-3.70031,0.718144,-0.252592\O,
 0,-3.00176,-1.93855,-1.48352\O,0,-0.0137014,0.15712,-2.69593\O,0,0.496
 927,-3.77156,1.08277\O,0,-0.996525,2.32878,1.06517\O,0,-1.50946,-2.081
 81,0.824493\O,0,-0.555652,3.83127,-1.14231\O,0,1.97638,2.99927,-1.1686
 2\O,0,-0.090142,-0.218104,3.71003\O,0,-2.09501,1.94498,-2.56219\O,0,3.
 36403,-1.42125,-1.50024\O,0,1.83851,-2.14418,2.79704\O,0,-3.45114,1.11
 131,1.20819\O,0,2.66452,0.837889,-2.88702\O,0,0.000122854,0.0289643,0.
 0225463\O,0,1.42639,-3.1724,-1.53511\O,0,0.831393,2.4155,3.12541\O,0,2
 .96438,2.25053,1.41596\O,0,-0.750954,-2.37542,-3.10913\O,0,-2.58156,-0
 .861169,3.01323\O,0,2.60189,-0.344519,0.886147\O,0,-3.77852,0.499698,-
 1.26225\\Version=AM64L-G09RevC.01\State=1-A\HF=-1605.6753136\RMSD=2.62
 2e-09\Dipole=3.7277346,-0.5362938,1.2477043\Quadrupole=-9.5181376,4.43
 60033,5.0821343,2.9904986,-4.956198,0.42075\PG=C01 [X(H43O21)]\\@


 REALITY IS FOR PEOPLE WHO CAN'T FACE SCIENCE FICTION.
 Job cpu time:  0 days  0 hours 35 minutes 17.6 seconds.
 File lengths (MBytes):  RWF=    133 Int=      0 D2E=      0 Chk=      9 Scr=      1
 Normal termination of Gaussian 09 at Fri Jun 27 11:54:20 2014.
