# Supplementary material for: Geometry of the magic number H+(H2O)21water cluster by proxy
Source: Royal Society of Chemistry journal article supplement (doi:10.1039/c4cp05246c), 2015-01-01
Supplement: c4cp05246c2.out [file c4cp05246c2.out]

 Entering Gaussian System, Link 0=g09
 Input=w2.gjf
 Output=w2.out
 Initial command:
 /cm/shared/apps/gaussian/g09/l1.exe /local/10967268.millipede2.cm.cluster/Gau-12956.inp -scrdir=/local/10967268.millipede2.cm.cluster/
 Entering Link 1 = /cm/shared/apps/gaussian/g09/l1.exe PID=     12960.
  
 Copyright (c) 1988,1990,1992,1993,1995,1998,2003,2009,2011,
            Gaussian, Inc.  All Rights Reserved.
  
 This is part of the Gaussian(R) 09 program.  It is based on
 the Gaussian(R) 03 system (copyright 2003, Gaussian, Inc.),
 the Gaussian(R) 98 system (copyright 1998, Gaussian, Inc.),
 the Gaussian(R) 94 system (copyright 1995, Gaussian, Inc.),
 the Gaussian 92(TM) system (copyright 1992, Gaussian, Inc.),
 the Gaussian 90(TM) system (copyright 1990, Gaussian, Inc.),
 the Gaussian 88(TM) system (copyright 1988, Gaussian, Inc.),
 the Gaussian 86(TM) system (copyright 1986, Carnegie Mellon
 University), and the Gaussian 82(TM) system (copyright 1983,
 Carnegie Mellon University). Gaussian is a federally registered
 trademark of Gaussian, Inc.
  
 This software contains proprietary and confidential information,
 including trade secrets, belonging to Gaussian, Inc.
  
 This software is provided under written license and may be
 used, copied, transmitted, or stored only in accord with that
 written license.
  
 The following legend is applicable only to US Government
 contracts under FAR:
  
                    RESTRICTED RIGHTS LEGEND
  
 Use, reproduction and disclosure by the US Government is
 subject to restrictions as set forth in subparagraphs (a)
 and (c) of the Commercial Computer Software - Restricted
 Rights clause in FAR 52.227-19.
  
 Gaussian, Inc.
 340 Quinnipiac St., Bldg. 40, Wallingford CT 06492
  
  
 ---------------------------------------------------------------
 Warning -- This program may not be used in any manner that
 competes with the business of Gaussian, Inc. or will provide
 assistance to any competitor of Gaussian, Inc.  The licensee
 of this program is prohibited from giving any competitor of
 Gaussian, Inc. access to this program.  By using this program,
 the user acknowledges that Gaussian, Inc. is engaged in the
 business of creating and licensing software in the field of
 computational chemistry and represents and warrants to the
 licensee that it is not a competitor of Gaussian, Inc. and that
 it will not use this program in any manner prohibited above.
 ---------------------------------------------------------------
  

 Cite this work as:
 Gaussian 09, Revision C.01,
 M. J. Frisch, G. W. Trucks, H. B. Schlegel, G. E. Scuseria, 
 M. A. Robb, J. R. Cheeseman, G. Scalmani, V. Barone, B. Mennucci, 
 G. A. Petersson, H. Nakatsuji, M. Caricato, X. Li, H. P. Hratchian, 
 A. F. Izmaylov, J. Bloino, G. Zheng, J. L. Sonnenberg, M. Hada, 
 M. Ehara, K. Toyota, R. Fukuda, J. Hasegawa, M. Ishida, T. Nakajima, 
 Y. Honda, O. Kitao, H. Nakai, T. Vreven, J. A. Montgomery, Jr., 
 J. E. Peralta, F. Ogliaro, M. Bearpark, J. J. Heyd, E. Brothers, 
 K. N. Kudin, V. N. Staroverov, T. Keith, R. Kobayashi, J. Normand, 
 K. Raghavachari, A. Rendell, J. C. Burant, S. S. Iyengar, J. Tomasi, 
 M. Cossi, N. Rega, J. M. Millam, M. Klene, J. E. Knox, J. B. Cross, 
 V. Bakken, C. Adamo, J. Jaramillo, R. Gomperts, R. E. Stratmann, 
 O. Yazyev, A. J. Austin, R. Cammi, C. Pomelli, J. W. Ochterski, 
 R. L. Martin, K. Morokuma, V. G. Zakrzewski, G. A. Voth, 
 P. Salvador, J. J. Dannenberg, S. Dapprich, A. D. Daniels, 
 O. Farkas, J. B. Foresman, J. V. Ortiz, J. Cioslowski, 
 and D. J. Fox, Gaussian, Inc., Wallingford CT, 2010.
 
 ******************************************
 Gaussian 09:  AM64L-G09RevC.01 23-Sep-2011
                27-Jun-2014 
 ******************************************
 %chk=w2
 %mem=2GB
 %nprocshared=12
 Will use up to   12 processors via shared memory.
 ------------------
 # sp b3lyp/6-31+g*
 ------------------
 1/38=1/1;
 2/12=2,17=6,18=5,40=1/2;
 3/5=1,6=6,7=11,11=2,16=1,25=1,30=1,74=-5/1,2,3;
 4//1;
 5/5=2,38=5/2;
 6/7=2,8=2,9=2,10=2,28=1/1;
 99/5=1,9=1/99;
 ---------
 something
 ---------
 Charge =  1 Multiplicity = 1
 Symbolic Z-Matrix:
 H                    -2.55671  -2.08736  -0.55769 
 H                    -2.2847   -2.09224  -2.09624 
 H                     0.05433   0.09445  -1.67846 
 H                     0.99032   0.42956  -2.88625 
 H                    -0.31206  -3.25517   1.04967 
 H                    -0.28192   2.49062   1.83393 
 H                    -0.75941   3.02051   0.38334 
 H                    -0.93179  -1.2868    0.57325 
 H                    -1.95546  -1.76255   1.67076 
 H                     0.53741   3.51816  -1.17042 
 H                     2.36786   2.1997   -1.63162 
 H                     2.44723   2.76126  -0.15573 
 H                     0.65786  -0.91671   3.30171 
 H                     0.4114    0.64293   3.44771 
 H                    -1.22333   1.37509  -2.78486 
 H                    -1.49065   2.72103  -2.0409 
 H                     2.63986  -2.04943  -1.59113 
 H                     1.47158  -2.90431   2.25583 
 H                    -3.18201   0.4438    1.9054 
 H                    -2.54586   1.73644   1.30092 
 H                     3.12966   0.04811  -2.51128 
 H                    -0.301     0.87537   0.41034 
 H                     0.97344  -0.08709   0.33925 
 H                     1.10149  -3.39238  -0.59257 
 H                     0.55237  -2.93375  -2.01305 
 H                     1.78658   2.45178   2.64425 
 H                     3.06912   1.24927   1.27848 
 H                    -0.45906  -1.42824  -3.10528 
 H                    -1.59219  -0.52727   3.31339 
 H                     3.03902  -0.78558   0.0306 
 H                     2.50828  -1.06431   1.52775 
 H                    -2.98264   1.18595  -1.7305 
 H                    -3.3872   -0.41972  -1.353 
 H                    -3.56807   0.79727  -0.1897 
 H                     5.69227  -3.41152  -3.12266 
 H                     3.93387  -3.33626  -3.34525 
 H                     4.94314  -1.91707  -3.71139 
 H                     5.41639  -4.06576  -0.61949 
 H                     4.31945  -3.11156   0.3947 
 H                     3.66752  -4.10814  -0.9237 
 H                     6.75582  -1.91244  -1.23873 
 H                     5.86182  -0.48779  -1.79959 
 H                     5.67974  -1.05047  -0.12367 
 H                     4.49963  -3.80889   4.14581 
 H                     3.53337  -4.28683   2.73851 
 H                     4.52208  -2.81193   2.67926 
 H                     2.36935  -0.75474   4.94728 
 H                     3.86527  -1.60141   5.39035 
 H                     3.77483  -0.71556   3.8576 
 H                     2.38613  -3.74428   5.68375 
 H                     0.95727  -2.85338   5.11836 
 H                     1.46771  -4.34417   4.29456 
 H                    -1.78956  -4.80807   2.19131 
 H                    -1.19186  -6.45854   2.42603 
 H                    -0.40214  -5.10594   3.26144 
 H                     1.11232  -7.12792   1.31384 
 H                     2.04284  -5.85536   0.49744 
 H                     1.83293  -5.81637   2.26339 
 H                     0.04262  -5.49482  -1.02465 
 H                    -1.00691  -6.62434  -0.14682 
 H                    -1.50137  -4.93363  -0.3451 
 H                    -1.61919  -4.92455  -5.0096 
 H                    -0.76568  -4.95158  -3.45276 
 H                    -2.4325   -4.33853  -3.5442 
 H                     0.37586  -3.51475  -5.98793 
 H                     0.83212  -2.01473  -5.16355 
 H                     1.14935  -3.58454  -4.38976 
 H                    -2.07283  -2.5907   -6.15437 
 H                    -2.90679  -2.11117  -4.66324 
 H                    -1.56907  -1.12424  -5.29415 
 H                     1.91224   0.10476  -5.31068 
 H                     3.39993   0.58794  -6.14473 
 H                     3.45344  -0.68382  -4.91139 
 H                     5.17179   2.02038  -4.83819 
 H                     4.90173   2.30904  -3.10608 
 H                     5.27748   0.67274  -3.69541 
 H                     2.66898   3.38558  -3.667 
 H                     2.81929   3.02176  -5.39792 
 H                     1.41052   2.43947  -4.49152 
 H                    -0.19377   6.61461  -2.96357 
 H                     0.96606   5.2743   -2.88398 
 H                    -0.69021   4.98559  -3.46792 
 H                     0.25839   7.05298  -0.41893 
 H                     0.00797   5.72568   0.73107 
 H                     1.38345   5.68003  -0.39807 
 H                    -2.20068   6.63081  -1.25326 
 H                    -2.63749   5.01535  -1.84066 
 H                    -2.34465   5.28364  -0.10669 
 H                    -4.17705  -0.44835   5.90866 
 H                    -2.59759   0.23644   5.47894 
 H                    -4.04681   0.69466   4.55451 
 H                    -3.13395  -2.84373   5.62489 
 H                    -2.35271  -3.25235   4.08442 
 H                    -1.5889   -2.08638   5.18998 
 H                    -5.27818  -2.17758   4.25093 
 H                    -5.12097  -0.96728   2.9638 
 H                    -4.41283  -2.58587   2.75625 
 H                     5.50969   4.50063   2.03854 
 H                     3.96998   4.67304   1.17353 
 H                     3.9817    4.2808    2.90752 
 H                     5.15371   0.7303    2.48425 
 H                     6.17667   2.10821   2.92451 
 H                     4.57575   1.92169   3.67122 
 H                     4.81944   2.98179  -0.51452 
 H                     6.31367   2.64315   0.3827 
 H                     5.19673   1.32288  -0.00102 
 H                     2.86936   3.26463   4.75501 
 H                     1.78159   3.67007   6.09102 
 H                     1.9014    1.98917   5.53037 
 H                     1.71852   4.93176   3.15744 
 H                    -0.04814   4.87521   2.9752 
 H                     0.6713    5.43614   4.49519 
 H                    -0.61091   1.91834   5.20967 
 H                    -0.80883   3.62093   5.67067 
 H                    -1.40054   3.05838   4.09653 
 C                     4.50063  -3.46451  -0.62548 
 C                     5.80408  -1.37631  -1.1625 
 C                     3.88537  -3.42939   3.32181 
 C                     3.20707  -1.33997   4.55538 
 C                     1.82498  -3.43735   4.79444 
 C                    -0.88477  -5.41152   2.32775 
 C                     1.34162  -6.05728   1.31455 
 C                    -0.64162  -5.59181  -0.17588 
 C                    -1.47192  -4.3843   -4.0686 
 C                     0.43905  -3.02621  -5.00935 
 C                    -1.93169  -2.1507   -5.16091 
 C                     2.98723   0.26957  -5.18123 
 C                     4.73891   1.59941  -3.92409 
 C                     2.48914   2.62443  -4.43273 
 C                    -0.08674   5.54601  -2.74582 
 C                     0.33169   5.96769  -0.28718 
 C                    -2.0207    5.55931  -1.11677 
 C                    -3.54605  -0.13142   5.07069 
 C                    -2.54727  -2.43945   4.79248 
 C                    -4.60686  -1.78568   3.47973 
 C                     4.49111   4.10883   1.954 
 C                     5.1422    1.79621   2.74219 
 C                     5.25492   2.37777   0.28731 
 C                     1.89744   3.03509   5.20602 
 C                     0.77819   4.71642   3.67627 
 C                    -0.59797   2.94669   4.83423 
 C                     4.52211   2.62183   1.61122 
 C                     0.75846   3.28351   4.21484 
 C                    -0.54023   5.24074  -1.31559 
 C                     3.24367   1.33411  -4.11149 
 C                     4.64909  -2.28065  -1.58689 
 C                     2.71177  -2.60898   3.86202 
 C                     0.06476  -5.23955   1.1384 
 C                    -0.93861  -2.97941  -4.34114 
 C                    -3.30325  -1.29662   4.10757 
 C                     4.81325  -2.76413  -3.02982 
 O                    -2.98243  -1.88418  -1.42697 
 O                     0.06392   0.15828  -2.67175 
 O                     0.49539  -3.83919   1.08008 
 O                    -0.90599   2.33065   1.08307 
 O                    -1.49003  -2.0642    0.84694 
 O                    -0.41732   3.79978  -1.09257 
 O                     2.12422   2.96354  -1.06248 
 O                     0.04002  -0.24221   3.66105 
 O                    -1.94882   1.99564  -2.53087 
 O                     3.44204  -1.45251  -1.5099 
 O                     1.89876  -2.14638   2.73247 
 O                    -3.36211   1.18139   1.27367 
 O                     2.6853    0.86868  -2.83841 
 O                     0.03744   0.01841   0.03147 
 O                     1.374    -3.11866  -1.49818 
 O                     0.90729   2.35738   3.08797 
 O                     3.12115   2.22355   1.45546 
 O                    -0.79445  -2.35923  -3.02355 
 O                    -2.49418  -0.80681   2.99178 
 O                     2.63406  -0.36498   0.83564 
 O                    -3.63772   0.57977  -1.20348 
 
 Stoichiometry    C36H115O21(1+)
 Framework group  C1[X(C36H115O21)]
 Deg. of freedom   510
 Full point group                 C1      NOp   1
 Largest Abelian subgroup         C1      NOp   1
 Largest concise Abelian subgroup C1      NOp   1
                         Standard orientation:                         
 ---------------------------------------------------------------------
 Center     Atomic      Atomic             Coordinates (Angstroms)
 Number     Number       Type             X           Y           Z
 ---------------------------------------------------------------------
      1          1           0        2.447187    0.682043   -3.035755
      2          1           0        1.881859    2.117470   -3.282927
      3          1           0       -0.617906    1.453896   -1.349532
      4          1           0       -1.570787    2.621577   -0.930376
      5          1           0        3.390490    0.244162   -0.224295
      6          1           0       -1.564978   -2.683763   -0.931877
      7          1           0       -2.375943   -1.714128   -1.939414
      8          1           0        1.630383   -0.246890   -1.295002
      9          1           0        2.699693   -1.282692   -1.807317
     10          1           0       -3.687949   -0.215701   -1.325484
     11          1           0       -3.155843    1.145866    0.453446
     12          1           0       -3.212727   -0.366558    0.910878
     13          1           0        1.725389   -2.437527    1.007284
     14          1           0        0.430161   -3.233721    0.556710
     15          1           0       -1.773530    1.633597   -3.118377
     16          1           0       -2.677749    0.383786   -3.356811
     17          1           0        0.625408    2.829659    1.452300
     18          1           0        2.960220   -0.538577    1.766049
     19          1           0        1.122380   -2.644042   -3.251709
     20          1           0       -0.419297   -2.457593   -3.080030
     21          1           0       -1.704768    2.948417    1.246342
     22          1           0       -0.554867   -0.793094   -1.134514
     23          1           0       -0.063939   -0.050168    0.193127
     24          1           0        2.591797    2.096444    0.578838
     25          1           0        1.875034    3.049913   -0.473204
     26          1           0       -1.849450   -2.894513    1.261634
     27          1           0       -1.558906   -0.904616    2.216705
     28          1           0        0.445916    3.193131   -2.028724
     29          1           0        2.007190   -3.137869   -1.147860
     30          1           0       -0.109702    0.990528    2.133392
     31          1           0        0.771439   -0.359525    2.175467
     32          1           0       -0.771270    0.348571   -4.378060
     33          1           0        0.915925    0.541313   -4.354351
     34          1           0        0.238675   -1.010580   -4.353654
     35          1           0        0.511286    5.452551    4.026304
     36          1           0        0.864454    5.200553    2.306144
     37          1           0       -0.819805    5.214993    2.880467
     38          1           0        1.983479    3.414899    4.697594
     39          1           0        1.752815    1.878819    3.843430
     40          1           0        2.414230    3.283592    2.980009
     41          1           0       -0.538689    3.447552    5.369846
     42          1           0       -1.757095    3.177732    4.110441
     43          1           0       -0.659392    1.862658    4.583821
     44          1           0        3.536530   -1.142924    5.352413
     45          1           0        3.788246    0.063752    4.078384
     46          1           0        2.157786   -0.221384    4.723897
     47          1           0        1.627181   -3.554802    3.106185
     48          1           0        2.116230   -3.261291    4.787145
     49          1           0        0.848404   -2.264609    4.051289
     50          1           0        4.563563   -3.041621    3.877127
     51          1           0        3.976477   -3.227515    2.211055
     52          1           0        4.918022   -1.792117    2.674500
     53          1           0        5.575677   -0.519990   -0.958385
     54          1           0        6.976798    0.056972   -0.041671
     55          1           0        5.799730   -1.023891    0.731211
     56          1           0        6.580088    1.858120    1.853789
     57          1           0        4.906125    2.311302    2.233603
     58          1           0        5.496138    0.675187    2.606657
     59          1           0        4.652081    3.046191   -0.183631
     60          1           0        6.249677    2.454189   -0.678754
     61          1           0        4.794909    1.853851   -1.494568
     62          1           0        3.323436    5.970940   -3.124244
     63          1           0        3.608158    4.800933   -1.819260
     64          1           0        3.491163    4.244762   -3.504334
     65          1           0        1.175102    6.769379   -1.831164
     66          1           0       -0.045456    5.561141   -1.397305
     67          1           0        1.534191    5.560119   -0.579746
     68          1           0        0.971729    5.971753   -4.321163
     69          1           0        1.249844    4.259221   -4.693709
     70          1           0       -0.220277    4.756070   -3.825690
     71          1           0       -2.312921    5.125015   -0.806590
     72          1           0       -3.434444    6.034601    0.221593
     73          1           0       -1.903161    5.445675    0.892194
     74          1           0       -4.807793    4.738562    2.047139
     75          1           0       -4.437676    3.020926    2.310200
     76          1           0       -3.251529    4.272217    2.749853
     77          1           0       -4.966060    2.566445   -0.133772
     78          1           0       -5.234242    4.283644   -0.494810
     79          1           0       -4.021948    3.367185   -1.408977
     80          1           0       -6.859859   -0.001564   -3.123021
     81          1           0       -5.946616    0.727072   -1.787719
     82          1           0       -5.408670    0.962650   -3.467797
     83          1           0       -6.566900   -2.327420   -1.949840
     84          1           0       -4.926946   -2.893305   -1.579339
     85          1           0       -5.633223   -1.542159   -0.660342
     86          1           0       -5.763596   -2.009223   -4.434754
     87          1           0       -4.368023   -0.962156   -4.753471
     88          1           0       -4.136590   -2.538849   -3.962986
     89          1           0        3.492514   -6.095338   -2.719593
     90          1           0        2.292562   -5.601943   -1.509232
     91          1           0        1.987482   -5.304861   -3.236496
     92          1           0        5.276492   -4.660565   -1.429142
     93          1           0        4.933163   -2.944374   -1.133900
     94          1           0        4.018870   -4.199041   -0.264973
     95          1           0        4.833808   -4.210897   -3.984738
     96          1           0        3.281839   -3.499782   -4.466354
     97          1           0        4.481304   -2.515440   -3.596452
     98          1           0       -4.940607   -2.262951    4.172321
     99          1           0       -4.942684   -1.929067    2.429567
    100          1           0       -4.034856   -3.315801    3.072627
    101          1           0       -1.286627   -1.276272    4.636718
    102          1           0       -2.678698   -1.959730    5.493419
    103          1           0       -1.821873   -2.934247    4.280375
    104          1           0       -4.191985    0.434201    2.961386
    105          1           0       -4.016436    0.125527    4.701012
    106          1           0       -2.632048    0.713763    3.765408
    107          1           0       -2.211173   -4.829426    2.815248
    108          1           0       -1.844671   -6.435856    2.169022
    109          1           0       -0.537261   -5.253934    2.387767
    110          1           0       -3.909564   -4.333026    0.937739
    111          1           0       -3.421882   -4.571558   -0.754230
    112          1           0       -3.643381   -5.969834    0.312710
    113          1           0        0.127841   -5.542139   -0.040022
    114          1           0       -1.209277   -6.662559   -0.367558
    115          1           0       -1.039465   -5.184934   -1.333112
    116          6           0        1.694142    2.966998    3.740608
    117          6           0       -0.732653    2.943276    4.417408
    118          6           0        3.100951   -0.704763    4.447650
    119          6           0        1.796260   -2.777909    3.858322
    120          6           0        4.157813   -2.504403    3.012991
    121          6           0        5.911924   -0.189887    0.031253
    122          6           0        5.547392    1.495406    1.882548
    123          6           0        5.203811    2.165329   -0.526691
    124          6           0        3.095226    4.958815   -2.774152
    125          6           0        1.029290    5.723853   -1.538084
    126          6           0        0.852767    4.950543   -3.942402
    127          6           0       -2.721695    5.202871    0.206506
    128          6           0       -4.012407    3.985899    2.014904
    129          6           0       -4.472639    3.500910   -0.418986
    130          6           0       -5.853163    0.246508   -2.768341
    131          6           0       -5.563238   -2.004431   -1.651635
    132          6           0       -4.800781   -1.670292   -4.038207
    133          6           0        2.760168   -5.322477   -2.460446
    134          6           0        4.479320   -3.937266   -1.224451
    135          6           0        4.043758   -3.516971   -3.679299
    136          6           0       -4.327856   -2.278859    3.265434
    137          6           0       -2.165061   -1.923546    4.526165
    138          6           0       -3.510290    0.060422    3.731449
    139          6           0       -1.586510   -5.373702    2.098111
    140          6           0       -3.284844   -4.935597    0.269601
    141          6           0       -0.926635   -5.605580   -0.327568
    142          6           0       -3.101110   -1.387478    3.439106
    143          6           0       -1.810105   -4.861329    0.673713
    144          6           0       -4.991121   -1.015211   -2.671658
    145          6           0       -3.413556    3.898183    0.609582
    146          6           0        0.273029    3.396610    3.361458
    147          6           0        2.860774   -1.785507    3.390984
    148          6           0        5.108779    1.028164    0.497126
    149          6           0        1.587282    4.781707   -2.609368
    150          6           0        3.437429   -3.953985   -2.347328
    151          6           0        0.201612    4.907570    3.127690
    152          8           0        2.103788    1.274246   -3.749573
    153          8           0       -0.996976    2.314808   -1.675000
    154          8           0        3.702420    0.637717    0.636973
    155          8           0       -1.486253   -2.102916   -1.728909
    156          8           0        2.577949   -0.321131   -1.590806
    157          8           0       -3.650284   -0.623020   -2.236280
    158          8           0       -3.596110    0.283898    0.280501
    159          8           0        1.403496   -3.167621    0.433563
    160          8           0       -2.050243    0.992464   -3.817167
    161          8           0       -0.113360    2.716861    2.121556
    162          8           0        2.307680   -1.155486    2.187644
    163          8           0        0.302847   -2.412479   -3.752012
    164          8           0       -2.427632    2.813519    0.585221
    165          8           0        0.004129   -0.041422   -0.795435
    166          8           0        1.977292    2.860536    0.490141
    167          8           0       -1.375349   -3.462772    0.604936
    168          8           0       -2.398208   -1.428995    2.154668
    169          8           0        1.408429    3.402755   -2.153353
    170          8           0        2.409659   -2.958741   -2.042898
    171          8           0       -0.118543    0.013823    1.946469
    172          8           0        0.129774   -0.040839   -4.710943
 ---------------------------------------------------------------------
 Rotational constants (GHZ):      0.0359499      0.0355127      0.0306758
 Standard basis: 6-31+G(d) (6D, 7F)
 There are  1313 symmetry adapted basis functions of A   symmetry.
 Integral buffers will be    131072 words long.
 Raffenetti 2 integral format.
 Two-electron integral symmetry is turned on.
  1313 basis functions,  2284 primitive gaussians,  1313 cartesian basis functions
   249 alpha electrons      249 beta electrons
       nuclear repulsion energy     11676.7418112803 Hartrees.
 NAtoms=  172 NActive=  172 NUniq=  172 SFac= 1.00D+00 NAtFMM=   60 NAOKFM=T Big=T
 One-electron integrals computed using PRISM.
 NBasis=  1313 RedAO= T  NBF=  1313
 NBsUse=  1313 1.00D-06 NBFU=  1313
 Harris functional with IExCor=  402 diagonalized for initial guess.
 ExpMin= 4.38D-02 ExpMax= 5.48D+03 ExpMxC= 8.25D+02 IAcc=2 IRadAn=         4 AccDes= 0.00D+00
 HarFok:  IExCor=  402 AccDes= 0.00D+00 IRadAn=         4 IDoV= 1
 ScaDFX=  1.000000  1.000000  1.000000  1.000000
 FoFCou: FMM=F IPFlag=           0 FMFlag=      100000 FMFlg1=        2001
         NFxFlg=           0 DoJE=T BraDBF=F KetDBF=T FulRan=T
         Omega=  0.000000  0.000000  1.000000  0.000000  0.000000 ICntrl=     500 IOpCl=  0
         NMat0=    1 NMatS0=    1 NMatT0=    0 NMatD0=    1 NMtDS0=    0 NMtDT0=    0
         I1Cent=           4 NGrid=           0.
 Petite list used in FoFCou.
 Initial guess orbital symmetries:
       Occupied  (A) (A) (A) (A) (A) (A) (A) (A) (A) (A) (A) (A)
                 (A) (A) (A) (A) (A) (A) (A) (A) (A) (A) (A) (A)
                 (A) (A) (A) (A) (A) (A) (A) (A) (A) (A) (A) (A)
                 (A) (A) (A) (A) (A) (A) (A) (A) (A) (A) (A) (A)
                 (A) (A) (A) (A) (A) (A) (A) (A) (A) (A) (A) (A)
                 (A) (A) (A) (A) (A) (A) (A) (A) (A) (A) (A) (A)
                 (A) (A) (A) (A) (A) (A) (A) (A) (A) (A) (A) (A)
                 (A) (A) (A) (A) (A) (A) (A) (A) (A) (A) (A) (A)
                 (A) (A) (A) (A) (A) (A) (A) (A) (A) (A) (A) (A)
                 (A) (A) (A) (A) (A) (A) (A) (A) (A) (A) (A) (A)
                 (A) (A) (A) (A) (A) (A) (A) (A) (A) (A) (A) (A)
                 (A) (A) (A) (A) (A) (A) (A) (A) (A) (A) (A) (A)
                 (A) (A) (A) (A) (A) (A) (A) (A) (A) (A) (A) (A)
                 (A) (A) (A) (A) (A) (A) (A) (A) (A) (A) (A) (A)
                 (A) (A) (A) (A) (A) (A) (A) (A) (A) (A) (A) (A)
                 (A) (A) (A) (A) (A) (A) (A) (A) (A) (A) (A) (A)
                 (A) (A) (A) (A) (A) (A) (A) (A) (A) (A) (A) (A)
                 (A) (A) (A) (A) (A) (A) (A) (A) (A) (A) (A) (A)
                 (A) (A) (A) (A) (A) (A) (A) (A) (A) (A) (A) (A)
                 (A) (A) (A) (A) (A) (A) (A) (A) (A) (A) (A) (A)
                 (A) (A) (A) (A) (A) (A) (A) (A) (A)
       Virtual   (A) (A) (A) (A) (A) (A) (A) (A) (A) (A) (A) (A)
                 (A) (A) (A) (A) (A) (A) (A) (A) (A) (A) (A) (A)
                 (A) (A) (A) (A) (A) (A) (A) (A) (A) (A) (A) (A)
                 (A) (A) (A) (A) (A) (A) (A) (A) (A) (A) (A) (A)
                 (A) (A) (A) (A) (A) (A) (A) (A) (A) (A) (A) (A)
                 (A) (A) (A) (A) (A) (A) (A) (A) (A) (A) (A) (A)
                 (A) (A) (A) (A) (A) (A) (A) (A) (A) (A) (A) (A)
                 (A) (A) (A) (A) (A) (A) (A) (A) (A) (A) (A) (A)
                 (A) (A) (A) (A) (A) (A) (A) (A) (A) (A) (A) (A)
                 (A) (A) (A) (A) (A) (A) (A) (A) (A) (A) (A) (A)
                 (A) (A) (A) (A) (A) (A) (A) (A) (A) (A) (A) (A)
                 (A) (A) (A) (A) (A) (A) (A) (A) (A) (A) (A) (A)
                 (A) (A) (A) (A) (A) (A) (A) (A) (A) (A) (A) (A)
                 (A) (A) (A) (A) (A) (A) (A) (A) (A) (A) (A) (A)
                 (A) (A) (A) (A) (A) (A) (A) (A) (A) (A) (A) (A)
                 (A) (A) (A) (A) (A) (A) (A) (A) (A) (A) (A) (A)
                 (A) (A) (A) (A) (A) (A) (A) (A) (A) (A) (A) (A)
                 (A) (A) (A) (A) (A) (A) (A) (A) (A) (A) (A) (A)
                 (A) (A) (A) (A) (A) (A) (A) (A) (A) (A) (A) (A)
                 (A) (A) (A) (A) (A) (A) (A) (A) (A) (A) (A) (A)
                 (A) (A) (A) (A) (A) (A) (A) (A) (A) (A) (A) (A)
                 (A) (A) (A) (A) (A) (A) (A) (A) (A) (A) (A) (A)
                 (A) (A) (A) (A) (A) (A) (A) (A) (A) (A) (A) (A)
                 (A) (A) (A) (A) (A) (A) (A) (A) (A) (A) (A) (A)
                 (A) (A) (A) (A) (A) (A) (A) (A) (A) (A) (A) (A)
                 (A) (A) (A) (A) (A) (A) (A) (A) (A) (A) (A) (A)
                 (A) (A) (A) (A) (A) (A) (A) (A) (A) (A) (A) (A)
                 (A) (A) (A) (A) (A) (A) (A) (A) (A) (A) (A) (A)
                 (A) (A) (A) (A) (A) (A) (A) (A) (A) (A) (A) (A)
                 (A) (A) (A) (A) (A) (A) (A) (A) (A) (A) (A) (A)
                 (A) (A) (A) (A) (A) (A) (A) (A) (A) (A) (A) (A)
                 (A) (A) (A) (A) (A) (A) (A) (A) (A) (A) (A) (A)
                 (A) (A) (A) (A) (A) (A) (A) (A) (A) (A) (A) (A)
                 (A) (A) (A) (A) (A) (A) (A) (A) (A) (A) (A) (A)
                 (A) (A) (A) (A) (A) (A) (A) (A) (A) (A) (A) (A)
                 (A) (A) (A) (A) (A) (A) (A) (A) (A) (A) (A) (A)
                 (A) (A) (A) (A) (A) (A) (A) (A) (A) (A) (A) (A)
                 (A) (A) (A) (A) (A) (A) (A) (A) (A) (A) (A) (A)
                 (A) (A) (A) (A) (A) (A) (A) (A) (A) (A) (A) (A)
                 (A) (A) (A) (A) (A) (A) (A) (A) (A) (A) (A) (A)
                 (A) (A) (A) (A) (A) (A) (A) (A) (A) (A) (A) (A)
                 (A) (A) (A) (A) (A) (A) (A) (A) (A) (A) (A) (A)
                 (A) (A) (A) (A) (A) (A) (A) (A) (A) (A) (A) (A)
                 (A) (A) (A) (A) (A) (A) (A) (A) (A) (A) (A) (A)
                 (A) (A) (A) (A) (A) (A) (A) (A) (A) (A) (A) (A)
                 (A) (A) (A) (A) (A) (A) (A) (A) (A) (A) (A) (A)
                 (A) (A) (A) (A) (A) (A) (A) (A) (A) (A) (A) (A)
                 (A) (A) (A) (A) (A) (A) (A) (A) (A) (A) (A) (A)
                 (A) (A) (A) (A) (A) (A) (A) (A) (A) (A) (A) (A)
                 (A) (A) (A) (A) (A) (A) (A) (A) (A) (A) (A) (A)
                 (A) (A) (A) (A) (A) (A) (A) (A) (A) (A) (A) (A)
                 (A) (A) (A) (A) (A) (A) (A) (A) (A) (A) (A) (A)
                 (A) (A) (A) (A) (A) (A) (A) (A) (A) (A) (A) (A)
                 (A) (A) (A) (A) (A) (A) (A) (A) (A) (A) (A) (A)
                 (A) (A) (A) (A) (A) (A) (A) (A) (A) (A) (A) (A)
                 (A) (A) (A) (A) (A) (A) (A) (A) (A) (A) (A) (A)
                 (A) (A) (A) (A) (A) (A) (A) (A) (A) (A) (A) (A)
                 (A) (A) (A) (A) (A) (A) (A) (A) (A) (A) (A) (A)
                 (A) (A) (A) (A) (A) (A) (A) (A) (A) (A) (A) (A)
                 (A) (A) (A) (A) (A) (A) (A) (A) (A) (A) (A) (A)
                 (A) (A) (A) (A) (A) (A) (A) (A) (A) (A) (A) (A)
                 (A) (A) (A) (A) (A) (A) (A) (A) (A) (A) (A) (A)
                 (A) (A) (A) (A) (A) (A) (A) (A) (A) (A) (A) (A)
                 (A) (A) (A) (A) (A) (A) (A) (A) (A) (A) (A) (A)
                 (A) (A) (A) (A) (A) (A) (A) (A) (A) (A) (A) (A)
                 (A) (A) (A) (A) (A) (A) (A) (A) (A) (A) (A) (A)
                 (A) (A) (A) (A) (A) (A) (A) (A) (A) (A) (A) (A)
                 (A) (A) (A) (A) (A) (A) (A) (A) (A) (A) (A) (A)
                 (A) (A) (A) (A) (A) (A) (A) (A) (A) (A) (A) (A)
                 (A) (A) (A) (A) (A) (A) (A) (A) (A) (A) (A) (A)
                 (A) (A) (A) (A) (A) (A) (A) (A) (A) (A) (A) (A)
                 (A) (A) (A) (A) (A) (A) (A) (A) (A) (A) (A) (A)
                 (A) (A) (A) (A) (A) (A) (A) (A) (A) (A) (A) (A)
                 (A) (A) (A) (A) (A) (A) (A) (A) (A) (A) (A) (A)
                 (A) (A) (A) (A) (A) (A) (A) (A) (A) (A) (A) (A)
                 (A) (A) (A) (A) (A) (A) (A) (A) (A) (A) (A) (A)
                 (A) (A) (A) (A) (A) (A) (A) (A) (A) (A) (A) (A)
                 (A) (A) (A) (A) (A) (A) (A) (A) (A) (A) (A) (A)
                 (A) (A) (A) (A) (A) (A) (A) (A) (A) (A) (A) (A)
                 (A) (A) (A) (A) (A) (A) (A) (A) (A) (A) (A) (A)
                 (A) (A) (A) (A) (A) (A) (A) (A) (A) (A) (A) (A)
                 (A) (A) (A) (A) (A) (A) (A) (A) (A) (A) (A) (A)
                 (A) (A) (A) (A) (A) (A) (A) (A) (A) (A) (A) (A)
                 (A) (A) (A) (A) (A) (A) (A) (A) (A) (A) (A) (A)
                 (A) (A) (A) (A) (A) (A) (A) (A) (A) (A) (A) (A)
                 (A) (A) (A) (A) (A) (A) (A) (A) (A) (A) (A) (A)
                 (A) (A) (A) (A) (A) (A) (A) (A) (A) (A) (A) (A)
                 (A) (A) (A) (A) (A) (A) (A) (A) (A) (A) (A) (A)
                 (A) (A) (A) (A) (A) (A) (A) (A)
 The electronic state of the initial guess is 1-A.
 Requested convergence on RMS density matrix=1.00D-08 within 128 cycles.
 Requested convergence on MAX density matrix=1.00D-06.
 Requested convergence on             energy=1.00D-06.
 No special actions if energy rises.
 SCF Done:  E(RB3LYP) =  -3021.00694807     A.U. after   13 cycles
             Convg  =    0.1691D-08             -V/T =  2.0094

 **********************************************************************

            Population analysis using the SCF density.

 **********************************************************************

 Orbital symmetries:
       Occupied  (A) (A) (A) (A) (A) (A) (A) (A) (A) (A) (A) (A)
                 (A) (A) (A) (A) (A) (A) (A) (A) (A) (A) (A) (A)
                 (A) (A) (A) (A) (A) (A) (A) (A) (A) (A) (A) (A)
                 (A) (A) (A) (A) (A) (A) (A) (A) (A) (A) (A) (A)
                 (A) (A) (A) (A) (A) (A) (A) (A) (A) (A) (A) (A)
                 (A) (A) (A) (A) (A) (A) (A) (A) (A) (A) (A) (A)
                 (A) (A) (A) (A) (A) (A) (A) (A) (A) (A) (A) (A)
                 (A) (A) (A) (A) (A) (A) (A) (A) (A) (A) (A) (A)
                 (A) (A) (A) (A) (A) (A) (A) (A) (A) (A) (A) (A)
                 (A) (A) (A) (A) (A) (A) (A) (A) (A) (A) (A) (A)
                 (A) (A) (A) (A) (A) (A) (A) (A) (A) (A) (A) (A)
                 (A) (A) (A) (A) (A) (A) (A) (A) (A) (A) (A) (A)
                 (A) (A) (A) (A) (A) (A) (A) (A) (A) (A) (A) (A)
                 (A) (A) (A) (A) (A) (A) (A) (A) (A) (A) (A) (A)
                 (A) (A) (A) (A) (A) (A) (A) (A) (A) (A) (A) (A)
                 (A) (A) (A) (A) (A) (A) (A) (A) (A) (A) (A) (A)
                 (A) (A) (A) (A) (A) (A) (A) (A) (A) (A) (A) (A)
                 (A) (A) (A) (A) (A) (A) (A) (A) (A) (A) (A) (A)
                 (A) (A) (A) (A) (A) (A) (A) (A) (A) (A) (A) (A)
                 (A) (A) (A) (A) (A) (A) (A) (A) (A) (A) (A) (A)
                 (A) (A) (A) (A) (A) (A) (A) (A) (A)
       Virtual   (A) (A) (A) (A) (A) (A) (A) (A) (A) (A) (A) (A)
                 (A) (A) (A) (A) (A) (A) (A) (A) (A) (A) (A) (A)
                 (A) (A) (A) (A) (A) (A) (A) (A) (A) (A) (A) (A)
                 (A) (A) (A) (A) (A) (A) (A) (A) (A) (A) (A) (A)
                 (A) (A) (A) (A) (A) (A) (A) (A) (A) (A) (A) (A)
                 (A) (A) (A) (A) (A) (A) (A) (A) (A) (A) (A) (A)
                 (A) (A) (A) (A) (A) (A) (A) (A) (A) (A) (A) (A)
                 (A) (A) (A) (A) (A) (A) (A) (A) (A) (A) (A) (A)
                 (A) (A) (A) (A) (A) (A) (A) (A) (A) (A) (A) (A)
                 (A) (A) (A) (A) (A) (A) (A) (A) (A) (A) (A) (A)
                 (A) (A) (A) (A) (A) (A) (A) (A) (A) (A) (A) (A)
                 (A) (A) (A) (A) (A) (A) (A) (A) (A) (A) (A) (A)
                 (A) (A) (A) (A) (A) (A) (A) (A) (A) (A) (A) (A)
                 (A) (A) (A) (A) (A) (A) (A) (A) (A) (A) (A) (A)
                 (A) (A) (A) (A) (A) (A) (A) (A) (A) (A) (A) (A)
                 (A) (A) (A) (A) (A) (A) (A) (A) (A) (A) (A) (A)
                 (A) (A) (A) (A) (A) (A) (A) (A) (A) (A) (A) (A)
                 (A) (A) (A) (A) (A) (A) (A) (A) (A) (A) (A) (A)
                 (A) (A) (A) (A) (A) (A) (A) (A) (A) (A) (A) (A)
                 (A) (A) (A) (A) (A) (A) (A) (A) (A) (A) (A) (A)
                 (A) (A) (A) (A) (A) (A) (A) (A) (A) (A) (A) (A)
                 (A) (A) (A) (A) (A) (A) (A) (A) (A) (A) (A) (A)
                 (A) (A) (A) (A) (A) (A) (A) (A) (A) (A) (A) (A)
                 (A) (A) (A) (A) (A) (A) (A) (A) (A) (A) (A) (A)
                 (A) (A) (A) (A) (A) (A) (A) (A) (A) (A) (A) (A)
                 (A) (A) (A) (A) (A) (A) (A) (A) (A) (A) (A) (A)
                 (A) (A) (A) (A) (A) (A) (A) (A) (A) (A) (A) (A)
                 (A) (A) (A) (A) (A) (A) (A) (A) (A) (A) (A) (A)
                 (A) (A) (A) (A) (A) (A) (A) (A) (A) (A) (A) (A)
                 (A) (A) (A) (A) (A) (A) (A) (A) (A) (A) (A) (A)
                 (A) (A) (A) (A) (A) (A) (A) (A) (A) (A) (A) (A)
                 (A) (A) (A) (A) (A) (A) (A) (A) (A) (A) (A) (A)
                 (A) (A) (A) (A) (A) (A) (A) (A) (A) (A) (A) (A)
                 (A) (A) (A) (A) (A) (A) (A) (A) (A) (A) (A) (A)
                 (A) (A) (A) (A) (A) (A) (A) (A) (A) (A) (A) (A)
                 (A) (A) (A) (A) (A) (A) (A) (A) (A) (A) (A) (A)
                 (A) (A) (A) (A) (A) (A) (A) (A) (A) (A) (A) (A)
                 (A) (A) (A) (A) (A) (A) (A) (A) (A) (A) (A) (A)
                 (A) (A) (A) (A) (A) (A) (A) (A) (A) (A) (A) (A)
                 (A) (A) (A) (A) (A) (A) (A) (A) (A) (A) (A) (A)
                 (A) (A) (A) (A) (A) (A) (A) (A) (A) (A) (A) (A)
                 (A) (A) (A) (A) (A) (A) (A) (A) (A) (A) (A) (A)
                 (A) (A) (A) (A) (A) (A) (A) (A) (A) (A) (A) (A)
                 (A) (A) (A) (A) (A) (A) (A) (A) (A) (A) (A) (A)
                 (A) (A) (A) (A) (A) (A) (A) (A) (A) (A) (A) (A)
                 (A) (A) (A) (A) (A) (A) (A) (A) (A) (A) (A) (A)
                 (A) (A) (A) (A) (A) (A) (A) (A) (A) (A) (A) (A)
                 (A) (A) (A) (A) (A) (A) (A) (A) (A) (A) (A) (A)
                 (A) (A) (A) (A) (A) (A) (A) (A) (A) (A) (A) (A)
                 (A) (A) (A) (A) (A) (A) (A) (A) (A) (A) (A) (A)
                 (A) (A) (A) (A) (A) (A) (A) (A) (A) (A) (A) (A)
                 (A) (A) (A) (A) (A) (A) (A) (A) (A) (A) (A) (A)
                 (A) (A) (A) (A) (A) (A) (A) (A) (A) (A) (A) (A)
                 (A) (A) (A) (A) (A) (A) (A) (A) (A) (A) (A) (A)
                 (A) (A) (A) (A) (A) (A) (A) (A) (A) (A) (A) (A)
                 (A) (A) (A) (A) (A) (A) (A) (A) (A) (A) (A) (A)
                 (A) (A) (A) (A) (A) (A) (A) (A) (A) (A) (A) (A)
                 (A) (A) (A) (A) (A) (A) (A) (A) (A) (A) (A) (A)
                 (A) (A) (A) (A) (A) (A) (A) (A) (A) (A) (A) (A)
                 (A) (A) (A) (A) (A) (A) (A) (A) (A) (A) (A) (A)
                 (A) (A) (A) (A) (A) (A) (A) (A) (A) (A) (A) (A)
                 (A) (A) (A) (A) (A) (A) (A) (A) (A) (A) (A) (A)
                 (A) (A) (A) (A) (A) (A) (A) (A) (A) (A) (A) (A)
                 (A) (A) (A) (A) (A) (A) (A) (A) (A) (A) (A) (A)
                 (A) (A) (A) (A) (A) (A) (A) (A) (A) (A) (A) (A)
                 (A) (A) (A) (A) (A) (A) (A) (A) (A) (A) (A) (A)
                 (A) (A) (A) (A) (A) (A) (A) (A) (A) (A) (A) (A)
                 (A) (A) (A) (A) (A) (A) (A) (A) (A) (A) (A) (A)
                 (A) (A) (A) (A) (A) (A) (A) (A) (A) (A) (A) (A)
                 (A) (A) (A) (A) (A) (A) (A) (A) (A) (A) (A) (A)
                 (A) (A) (A) (A) (A) (A) (A) (A) (A) (A) (A) (A)
                 (A) (A) (A) (A) (A) (A) (A) (A) (A) (A) (A) (A)
                 (A) (A) (A) (A) (A) (A) (A) (A) (A) (A) (A) (A)
                 (A) (A) (A) (A) (A) (A) (A) (A) (A) (A) (A) (A)
                 (A) (A) (A) (A) (A) (A) (A) (A) (A) (A) (A) (A)
                 (A) (A) (A) (A) (A) (A) (A) (A) (A) (A) (A) (A)
                 (A) (A) (A) (A) (A) (A) (A) (A) (A) (A) (A) (A)
                 (A) (A) (A) (A) (A) (A) (A) (A) (A) (A) (A) (A)
                 (A) (A) (A) (A) (A) (A) (A) (A) (A) (A) (A) (A)
                 (A) (A) (A) (A) (A) (A) (A) (A) (A) (A) (A) (A)
                 (A) (A) (A) (A) (A) (A) (A) (A) (A) (A) (A) (A)
                 (A) (A) (A) (A) (A) (A) (A) (A) (A) (A) (A) (A)
                 (A) (A) (A) (A) (A) (A) (A) (A) (A) (A) (A) (A)
                 (A) (A) (A) (A) (A) (A) (A) (A) (A) (A) (A) (A)
                 (A) (A) (A) (A) (A) (A) (A) (A) (A) (A) (A) (A)
                 (A) (A) (A) (A) (A) (A) (A) (A) (A) (A) (A) (A)
                 (A) (A) (A) (A) (A) (A) (A) (A) (A) (A) (A) (A)
                 (A) (A) (A) (A) (A) (A) (A) (A) (A) (A) (A) (A)
                 (A) (A) (A) (A) (A) (A) (A) (A)
 The electronic state is 1-A.
 Alpha  occ. eigenvalues --  -19.27595 -19.25921 -19.25738 -19.25687 -19.25550
 Alpha  occ. eigenvalues --  -19.25420 -19.25190 -19.24831 -19.24770 -19.24389
 Alpha  occ. eigenvalues --  -19.24274 -19.24237 -19.24235 -19.24233 -19.24162
 Alpha  occ. eigenvalues --  -19.23337 -19.23246 -19.23137 -19.23105 -19.23054
 Alpha  occ. eigenvalues --  -19.23018 -10.34342 -10.34204 -10.34083 -10.34053
 Alpha  occ. eigenvalues --  -10.33962 -10.33534 -10.32910 -10.32841 -10.32811
 Alpha  occ. eigenvalues --  -10.26747 -10.26691 -10.26642 -10.26491 -10.26484
 Alpha  occ. eigenvalues --  -10.26477 -10.26460 -10.26417 -10.26382 -10.26377
 Alpha  occ. eigenvalues --  -10.26369 -10.26181 -10.26160 -10.26062 -10.26033
 Alpha  occ. eigenvalues --  -10.25996 -10.25974 -10.25563 -10.25504 -10.25391
 Alpha  occ. eigenvalues --  -10.25389 -10.25163 -10.25099 -10.25055 -10.25029
 Alpha  occ. eigenvalues --  -10.25019 -10.24986  -1.14606  -1.13152  -1.12623
 Alpha  occ. eigenvalues --   -1.12528  -1.11954  -1.11664  -1.11547  -1.11396
 Alpha  occ. eigenvalues --   -1.11329  -1.11118  -1.10857  -1.09686  -1.09654
 Alpha  occ. eigenvalues --   -1.09558  -1.08655  -1.08375  -1.08179  -1.07944
 Alpha  occ. eigenvalues --   -1.07927  -1.07812  -1.07522  -0.88682  -0.88643
 Alpha  occ. eigenvalues --   -0.88479  -0.88194  -0.88092  -0.87738  -0.87166
 Alpha  occ. eigenvalues --   -0.87060  -0.87034  -0.78534  -0.78457  -0.78404
 Alpha  occ. eigenvalues --   -0.78303  -0.78188  -0.78086  -0.78072  -0.78052
 Alpha  occ. eigenvalues --   -0.77931  -0.77830  -0.77801  -0.77414  -0.77057
 Alpha  occ. eigenvalues --   -0.77001  -0.76966  -0.76862  -0.76765  -0.76736
 Alpha  occ. eigenvalues --   -0.67507  -0.67445  -0.67252  -0.66415  -0.66275
 Alpha  occ. eigenvalues --   -0.65954  -0.65916  -0.65789  -0.65696  -0.64717
 Alpha  occ. eigenvalues --   -0.64594  -0.63889  -0.63278  -0.63016  -0.62633
 Alpha  occ. eigenvalues --   -0.62212  -0.62125  -0.61945  -0.61522  -0.61106
 Alpha  occ. eigenvalues --   -0.60751  -0.60723  -0.59079  -0.59058  -0.58681
 Alpha  occ. eigenvalues --   -0.58255  -0.58089  -0.57973  -0.57337  -0.57294
 Alpha  occ. eigenvalues --   -0.57194  -0.55460  -0.54976  -0.54883  -0.54837
 Alpha  occ. eigenvalues --   -0.54637  -0.54437  -0.54377  -0.54233  -0.54035
 Alpha  occ. eigenvalues --   -0.53959  -0.53867  -0.53730  -0.53618  -0.53534
 Alpha  occ. eigenvalues --   -0.53380  -0.53156  -0.52802  -0.52745  -0.52230
 Alpha  occ. eigenvalues --   -0.51790  -0.51479  -0.51334  -0.51065  -0.50901
 Alpha  occ. eigenvalues --   -0.50763  -0.50502  -0.50244  -0.50099  -0.49944
 Alpha  occ. eigenvalues --   -0.49754  -0.49653  -0.49348  -0.49247  -0.49175
 Alpha  occ. eigenvalues --   -0.48784  -0.48646  -0.48544  -0.48290  -0.48195
 Alpha  occ. eigenvalues --   -0.48036  -0.47827  -0.47727  -0.47679  -0.47569
 Alpha  occ. eigenvalues --   -0.47492  -0.47377  -0.47284  -0.47187  -0.47067
 Alpha  occ. eigenvalues --   -0.46932  -0.46815  -0.46641  -0.46420  -0.46123
 Alpha  occ. eigenvalues --   -0.46011  -0.45957  -0.45930  -0.45816  -0.45744
 Alpha  occ. eigenvalues --   -0.45670  -0.45614  -0.45461  -0.45225  -0.45206
 Alpha  occ. eigenvalues --   -0.45185  -0.44914  -0.44803  -0.44664  -0.44630
 Alpha  occ. eigenvalues --   -0.44578  -0.44484  -0.44347  -0.44304  -0.44105
 Alpha  occ. eigenvalues --   -0.44038  -0.43933  -0.43808  -0.43644  -0.43577
 Alpha  occ. eigenvalues --   -0.43530  -0.43440  -0.43042  -0.42925  -0.42889
 Alpha  occ. eigenvalues --   -0.42835  -0.42472  -0.41974  -0.41823  -0.41701
 Alpha  occ. eigenvalues --   -0.41515  -0.41183  -0.40923  -0.40800  -0.40687
 Alpha  occ. eigenvalues --   -0.40488  -0.40393  -0.39892  -0.39655  -0.39488
 Alpha  occ. eigenvalues --   -0.39299  -0.39264  -0.39170  -0.39139  -0.39031
 Alpha  occ. eigenvalues --   -0.38315  -0.38213  -0.38083  -0.37782  -0.37686
 Alpha  occ. eigenvalues --   -0.37300  -0.36963  -0.36872  -0.36866
 Alpha virt. eigenvalues --   -0.08984  -0.07466  -0.07442  -0.07360  -0.05998
 Alpha virt. eigenvalues --   -0.05994  -0.05954  -0.05928  -0.05904  -0.05219
 Alpha virt. eigenvalues --   -0.04823  -0.04538  -0.04517  -0.04335  -0.04282
 Alpha virt. eigenvalues --   -0.04254  -0.04083  -0.03471  -0.03421  -0.03207
 Alpha virt. eigenvalues --   -0.03167  -0.02993  -0.02950  -0.02765  -0.02602
 Alpha virt. eigenvalues --   -0.02580  -0.02323  -0.02221  -0.02093  -0.01915
 Alpha virt. eigenvalues --   -0.01695  -0.01652  -0.01383  -0.01287  -0.01235
 Alpha virt. eigenvalues --   -0.01037  -0.00818  -0.00704  -0.00564  -0.00538
 Alpha virt. eigenvalues --   -0.00385  -0.00331  -0.00136   0.00057   0.00107
 Alpha virt. eigenvalues --    0.00246   0.00372   0.00437   0.00562   0.00622
 Alpha virt. eigenvalues --    0.01038   0.01066   0.01382   0.01448   0.01553
 Alpha virt. eigenvalues --    0.01613   0.01710   0.01888   0.01985   0.02006
 Alpha virt. eigenvalues --    0.02057   0.02318   0.02350   0.02421   0.02616
 Alpha virt. eigenvalues --    0.02959   0.03003   0.03029   0.03239   0.03322
 Alpha virt. eigenvalues --    0.03441   0.03559   0.03627   0.03763   0.03921
 Alpha virt. eigenvalues --    0.03980   0.04081   0.04283   0.04367   0.04415
 Alpha virt. eigenvalues --    0.04530   0.04558   0.04617   0.04733   0.04852
 Alpha virt. eigenvalues --    0.05190   0.05248   0.05343   0.05373   0.05482
 Alpha virt. eigenvalues --    0.05546   0.05848   0.06076   0.06195   0.06369
 Alpha virt. eigenvalues --    0.06531   0.06703   0.06828   0.07111   0.07194
 Alpha virt. eigenvalues --    0.07460   0.07534   0.07580   0.07679   0.07777
 Alpha virt. eigenvalues --    0.07933   0.08135   0.08198   0.08374   0.08542
 Alpha virt. eigenvalues --    0.08832   0.08934   0.09048   0.09112   0.09280
 Alpha virt. eigenvalues --    0.09315   0.09394   0.09494   0.09732   0.09807
 Alpha virt. eigenvalues --    0.10002   0.10082   0.10203   0.10274   0.10338
 Alpha virt. eigenvalues --    0.10517   0.10557   0.10707   0.10806   0.10857
 Alpha virt. eigenvalues --    0.10966   0.11062   0.11096   0.11279   0.11306
 Alpha virt. eigenvalues --    0.11380   0.11421   0.11516   0.11586   0.11678
 Alpha virt. eigenvalues --    0.11830   0.12028   0.12353   0.12438   0.12536
 Alpha virt. eigenvalues --    0.12721   0.12824   0.12853   0.12878   0.13032
 Alpha virt. eigenvalues --    0.13109   0.13165   0.13312   0.13373   0.13478
 Alpha virt. eigenvalues --    0.13575   0.13626   0.13680   0.13859   0.13987
 Alpha virt. eigenvalues --    0.14208   0.14284   0.14374   0.14491   0.14570
 Alpha virt. eigenvalues --    0.14632   0.14689   0.14700   0.14886   0.15329
 Alpha virt. eigenvalues --    0.15417   0.15536   0.15621   0.15824   0.15916
 Alpha virt. eigenvalues --    0.15989   0.16015   0.16056   0.16133   0.16234
 Alpha virt. eigenvalues --    0.16265   0.16399   0.16550   0.16684   0.16844
 Alpha virt. eigenvalues --    0.16933   0.17012   0.17185   0.17276   0.17312
 Alpha virt. eigenvalues --    0.17398   0.17527   0.17651   0.17678   0.17833
 Alpha virt. eigenvalues --    0.17899   0.17990   0.18081   0.18134   0.18280
 Alpha virt. eigenvalues --    0.18541   0.18631   0.18697   0.18747   0.18870
 Alpha virt. eigenvalues --    0.18926   0.18990   0.19247   0.19323   0.19607
 Alpha virt. eigenvalues --    0.19742   0.19801   0.19859   0.19990   0.20119
 Alpha virt. eigenvalues --    0.20203   0.20267   0.20322   0.20389   0.20507
 Alpha virt. eigenvalues --    0.20636   0.20748   0.20837   0.21017   0.21137
 Alpha virt. eigenvalues --    0.21222   0.21271   0.21366   0.21402   0.21547
 Alpha virt. eigenvalues --    0.21707   0.21757   0.21950   0.22041   0.22090
 Alpha virt. eigenvalues --    0.22282   0.22306   0.22455   0.22516   0.22564
 Alpha virt. eigenvalues --    0.22585   0.22771   0.22972   0.23103   0.23276
 Alpha virt. eigenvalues --    0.23379   0.23426   0.23481   0.23634   0.23695
 Alpha virt. eigenvalues --    0.23764   0.23895   0.23929   0.24009   0.24085
 Alpha virt. eigenvalues --    0.24234   0.24345   0.24414   0.24588   0.24889
 Alpha virt. eigenvalues --    0.25005   0.25034   0.25185   0.25241   0.25440
 Alpha virt. eigenvalues --    0.25536   0.25691   0.25699   0.25937   0.26006
 Alpha virt. eigenvalues --    0.26258   0.26282   0.26299   0.26506   0.26566
 Alpha virt. eigenvalues --    0.26682   0.26714   0.26890   0.26996   0.27140
 Alpha virt. eigenvalues --    0.27315   0.27322   0.27582   0.27677   0.27927
 Alpha virt. eigenvalues --    0.28053   0.28522   0.28969   0.28991   0.29149
 Alpha virt. eigenvalues --    0.29361   0.29500   0.29756   0.29887   0.30103
 Alpha virt. eigenvalues --    0.30219   0.30471   0.30514   0.30683   0.30867
 Alpha virt. eigenvalues --    0.31050   0.31172   0.31521   0.31786   0.31936
 Alpha virt. eigenvalues --    0.31980   0.32287   0.32486   0.32645   0.33050
 Alpha virt. eigenvalues --    0.33184   0.33450   0.33553   0.33744   0.34040
 Alpha virt. eigenvalues --    0.34186   0.34191   0.34452   0.34558   0.34777
 Alpha virt. eigenvalues --    0.35100   0.35228   0.35431   0.35670   0.35757
 Alpha virt. eigenvalues --    0.35914   0.35990   0.36230   0.36499   0.36907
 Alpha virt. eigenvalues --    0.37094   0.37432   0.37624   0.38186   0.38788
 Alpha virt. eigenvalues --    0.39492   0.39907   0.40380   0.40522   0.41016
 Alpha virt. eigenvalues --    0.41422   0.41572   0.41848   0.42221   0.42748
 Alpha virt. eigenvalues --    0.43195   0.43531   0.43749   0.44057   0.44171
 Alpha virt. eigenvalues --    0.44575   0.44914   0.45441   0.45568   0.45812
 Alpha virt. eigenvalues --    0.46257   0.46601   0.46656   0.47012   0.47417
 Alpha virt. eigenvalues --    0.47680   0.48176   0.49451   0.49889   0.50296
 Alpha virt. eigenvalues --    0.50711   0.51221   0.52769   0.53232   0.53491
 Alpha virt. eigenvalues --    0.54186   0.54712   0.54895   0.55564   0.56243
 Alpha virt. eigenvalues --    0.57437   0.58533   0.58936   0.59961   0.61103
 Alpha virt. eigenvalues --    0.61815   0.62071   0.62357   0.62489   0.62637
 Alpha virt. eigenvalues --    0.63168   0.63363   0.63529   0.63807   0.63903
 Alpha virt. eigenvalues --    0.64155   0.64328   0.64512   0.64596   0.64897
 Alpha virt. eigenvalues --    0.65274   0.65347   0.65453   0.65586   0.65798
 Alpha virt. eigenvalues --    0.65828   0.66174   0.66247   0.66480   0.66783
 Alpha virt. eigenvalues --    0.67172   0.67265   0.67408   0.67623   0.67701
 Alpha virt. eigenvalues --    0.67977   0.68125   0.68399   0.68595   0.68647
 Alpha virt. eigenvalues --    0.68929   0.69072   0.69560   0.69618   0.69795
 Alpha virt. eigenvalues --    0.70020   0.70681   0.70992   0.71107   0.71238
 Alpha virt. eigenvalues --    0.71506   0.71985   0.72127   0.72481   0.72943
 Alpha virt. eigenvalues --    0.73073   0.73322   0.73673   0.74068   0.74193
 Alpha virt. eigenvalues --    0.74479   0.74973   0.75198   0.75474   0.75788
 Alpha virt. eigenvalues --    0.75857   0.76061   0.76685   0.77125   0.77531
 Alpha virt. eigenvalues --    0.77680   0.78572   0.78747   0.78924   0.79215
 Alpha virt. eigenvalues --    0.79522   0.79742   0.80318   0.80664   0.80754
 Alpha virt. eigenvalues --    0.81188   0.81657   0.81985   0.82464   0.82667
 Alpha virt. eigenvalues --    0.82800   0.83040   0.83324   0.83506   0.83737
 Alpha virt. eigenvalues --    0.84463   0.84663   0.85137   0.85201   0.85531
 Alpha virt. eigenvalues --    0.85779   0.86055   0.86579   0.86805   0.86987
 Alpha virt. eigenvalues --    0.87133   0.87597   0.87971   0.88196   0.88658
 Alpha virt. eigenvalues --    0.88980   0.89199   0.89428   0.89904   0.90357
 Alpha virt. eigenvalues --    0.90888   0.91603   0.92211   0.92367   0.92644
 Alpha virt. eigenvalues --    0.92821   0.93332   0.93476   0.93700   0.94009
 Alpha virt. eigenvalues --    0.94107   0.94462   0.94536   0.94898   0.95173
 Alpha virt. eigenvalues --    0.95486   0.95597   0.95792   0.95880   0.96502
 Alpha virt. eigenvalues --    0.96712   0.96800   0.97079   0.97183   0.97336
 Alpha virt. eigenvalues --    0.97448   0.97951   0.97979   0.98265   0.98382
 Alpha virt. eigenvalues --    0.98527   0.98997   0.99389   0.99486   0.99869
 Alpha virt. eigenvalues --    1.00025   1.00223   1.00576   1.00748   1.01230
 Alpha virt. eigenvalues --    1.01427   1.01859   1.02045   1.02166   1.02518
 Alpha virt. eigenvalues --    1.02734   1.02910   1.03259   1.03834   1.04262
 Alpha virt. eigenvalues --    1.04377   1.04858   1.04925   1.05302   1.05740
 Alpha virt. eigenvalues --    1.05895   1.06627   1.07257   1.07846   1.08048
 Alpha virt. eigenvalues --    1.08418   1.08581   1.09472   1.09932   1.10241
 Alpha virt. eigenvalues --    1.10382   1.10638   1.10774   1.11149   1.11465
 Alpha virt. eigenvalues --    1.11773   1.11861   1.12044   1.12169   1.12248
 Alpha virt. eigenvalues --    1.12602   1.12920   1.13057   1.13193   1.13370
 Alpha virt. eigenvalues --    1.13679   1.13875   1.14125   1.14714   1.14822
 Alpha virt. eigenvalues --    1.15115   1.15286   1.15593   1.15799   1.15995
 Alpha virt. eigenvalues --    1.16152   1.16519   1.16688   1.16986   1.17148
 Alpha virt. eigenvalues --    1.17388   1.17602   1.18031   1.18162   1.18566
 Alpha virt. eigenvalues --    1.18780   1.18909   1.19211   1.19329   1.19446
 Alpha virt. eigenvalues --    1.19667   1.20014   1.20127   1.20485   1.20601
 Alpha virt. eigenvalues --    1.20751   1.20900   1.21153   1.21329   1.21428
 Alpha virt. eigenvalues --    1.21555   1.21921   1.22240   1.22322   1.22773
 Alpha virt. eigenvalues --    1.22908   1.23084   1.23347   1.23497   1.23585
 Alpha virt. eigenvalues --    1.23776   1.24127   1.24299   1.24679   1.24904
 Alpha virt. eigenvalues --    1.25091   1.25633   1.25891   1.25959   1.26149
 Alpha virt. eigenvalues --    1.26571   1.26884   1.27266   1.27497   1.27570
 Alpha virt. eigenvalues --    1.27832   1.28281   1.28310   1.28827   1.29046
 Alpha virt. eigenvalues --    1.29297   1.29702   1.29868   1.30185   1.30307
 Alpha virt. eigenvalues --    1.30519   1.31025   1.31433   1.31574   1.32042
 Alpha virt. eigenvalues --    1.32288   1.32411   1.32687   1.33286   1.33807
 Alpha virt. eigenvalues --    1.34133   1.34539   1.34781   1.35228   1.35512
 Alpha virt. eigenvalues --    1.35887   1.36450   1.37140   1.37155   1.37442
 Alpha virt. eigenvalues --    1.37935   1.38073   1.38132   1.38547   1.39038
 Alpha virt. eigenvalues --    1.39607   1.39903   1.40251   1.41311   1.41556
 Alpha virt. eigenvalues --    1.42248   1.42614   1.43227   1.43330   1.43581
 Alpha virt. eigenvalues --    1.43965   1.44409   1.44615   1.45291   1.45429
 Alpha virt. eigenvalues --    1.45708   1.46589   1.46758   1.47127   1.47656
 Alpha virt. eigenvalues --    1.47868   1.48346   1.48748   1.49307   1.49571
 Alpha virt. eigenvalues --    1.50327   1.50408   1.50812   1.51278   1.51631
 Alpha virt. eigenvalues --    1.51773   1.52935   1.53134   1.53556   1.53961
 Alpha virt. eigenvalues --    1.54265   1.54832   1.55604   1.55963   1.56259
 Alpha virt. eigenvalues --    1.56463   1.57603   1.57887   1.58737   1.59392
 Alpha virt. eigenvalues --    1.59751   1.60023   1.60627   1.61257   1.61563
 Alpha virt. eigenvalues --    1.62250   1.62528   1.63143   1.63267   1.63777
 Alpha virt. eigenvalues --    1.64134   1.64294   1.64380   1.64575   1.64709
 Alpha virt. eigenvalues --    1.64903   1.65111   1.65305   1.65538   1.65606
 Alpha virt. eigenvalues --    1.65879   1.66169   1.66425   1.66619   1.66741
 Alpha virt. eigenvalues --    1.66939   1.67321   1.67692   1.67875   1.68109
 Alpha virt. eigenvalues --    1.68231   1.68328   1.68792   1.68967   1.69390
 Alpha virt. eigenvalues --    1.69625   1.70323   1.70423   1.70646   1.70775
 Alpha virt. eigenvalues --    1.70889   1.71274   1.71337   1.71587   1.71831
 Alpha virt. eigenvalues --    1.71985   1.72361   1.72498   1.72715   1.73181
 Alpha virt. eigenvalues --    1.73627   1.73852   1.74030   1.74485   1.74787
 Alpha virt. eigenvalues --    1.75079   1.75617   1.76038   1.76278   1.76824
 Alpha virt. eigenvalues --    1.77186   1.77627   1.77846   1.78282   1.78600
 Alpha virt. eigenvalues --    1.78892   1.79026   1.79108   1.79628   1.79704
 Alpha virt. eigenvalues --    1.80643   1.81036   1.81299   1.81536   1.81812
 Alpha virt. eigenvalues --    1.82116   1.82232   1.82478   1.82846   1.82928
 Alpha virt. eigenvalues --    1.83278   1.83310   1.83466   1.83592   1.83902
 Alpha virt. eigenvalues --    1.84043   1.84293   1.84417   1.84459   1.84870
 Alpha virt. eigenvalues --    1.84916   1.85171   1.85194   1.85308   1.85788
 Alpha virt. eigenvalues --    1.85836   1.86033   1.86310   1.86630   1.86879
 Alpha virt. eigenvalues --    1.87076   1.87339   1.87927   1.88171   1.88654
 Alpha virt. eigenvalues --    1.89624   1.89746   1.90152   1.90862   1.91280
 Alpha virt. eigenvalues --    1.91984   1.92749   1.92914   1.93363   1.94561
 Alpha virt. eigenvalues --    1.94721   1.95033   1.95531   1.96376   1.97296
 Alpha virt. eigenvalues --    1.97487   1.97893   1.98698   1.99531   2.00741
 Alpha virt. eigenvalues --    2.01011   2.01481   2.02307   2.02628   2.03417
 Alpha virt. eigenvalues --    2.04410   2.06181   2.07508   2.07598   2.07807
 Alpha virt. eigenvalues --    2.07889   2.08315   2.08419   2.08529   2.08568
 Alpha virt. eigenvalues --    2.08768   2.08939   2.09079   2.09290   2.09525
 Alpha virt. eigenvalues --    2.09640   2.10195   2.10639   2.10987   2.11565
 Alpha virt. eigenvalues --    2.11905   2.12132   2.12535   2.12681   2.13089
 Alpha virt. eigenvalues --    2.13350   2.13925   2.14773   2.14953   2.15682
 Alpha virt. eigenvalues --    2.16555   2.16909   2.17043   2.18540   2.19029
 Alpha virt. eigenvalues --    2.19173   2.19455   2.19576   2.19671   2.19930
 Alpha virt. eigenvalues --    2.20106   2.20358   2.20450   2.20514   2.20613
 Alpha virt. eigenvalues --    2.20705   2.20944   2.20985   2.21099   2.21201
 Alpha virt. eigenvalues --    2.21291   2.21393   2.21424   2.21523   2.21563
 Alpha virt. eigenvalues --    2.21703   2.21833   2.22000   2.22050   2.22168
 Alpha virt. eigenvalues --    2.22188   2.22321   2.22447   2.22512   2.22566
 Alpha virt. eigenvalues --    2.22624   2.22714   2.22882   2.22942   2.23096
 Alpha virt. eigenvalues --    2.23281   2.23422   2.23570   2.23721   2.24065
 Alpha virt. eigenvalues --    2.24231   2.24453   2.24681   2.24852   2.24915
 Alpha virt. eigenvalues --    2.25329   2.25794   2.26096   2.26902   2.35233
 Alpha virt. eigenvalues --    2.36053   2.36711   2.36966   2.37334   2.37860
 Alpha virt. eigenvalues --    2.38222   2.38906   2.39082   2.39744   2.39873
 Alpha virt. eigenvalues --    2.40131   2.40494   2.41139   2.41708   2.43515
 Alpha virt. eigenvalues --    2.44521   2.44913   2.45427   2.46100   2.46359
 Alpha virt. eigenvalues --    2.46493   2.47409   2.48207   2.48780   2.49644
 Alpha virt. eigenvalues --    2.50038   2.50436   2.51982   2.52411   2.52502
 Alpha virt. eigenvalues --    2.52798   2.52841   2.53237   2.53620   2.54162
 Alpha virt. eigenvalues --    2.54541   2.54973   2.56928   2.60603   2.61331
 Alpha virt. eigenvalues --    2.61561   2.62004   2.62570   2.62774   2.63185
 Alpha virt. eigenvalues --    2.63945   2.64104   2.64808   2.65452   2.65603
 Alpha virt. eigenvalues --    2.66279   2.66934   2.67434   2.67729   2.67735
 Alpha virt. eigenvalues --    2.68430   2.68624   2.68793   2.68888   2.69098
 Alpha virt. eigenvalues --    2.69255   2.69468   2.69528   2.69753   2.69877
 Alpha virt. eigenvalues --    2.69960   2.70245   2.70350   2.70501   2.70578
 Alpha virt. eigenvalues --    2.70863   2.70971   2.71158   2.71346   2.71670
 Alpha virt. eigenvalues --    2.72012   2.72118   2.72638   2.86877   2.86956
 Alpha virt. eigenvalues --    2.87921   2.88117   2.88278   2.88522   2.88839
 Alpha virt. eigenvalues --    2.89160   2.89485   4.17334   4.18474   4.18724
 Alpha virt. eigenvalues --    4.18917   4.19015   4.19198   4.21336   4.22431
 Alpha virt. eigenvalues --    4.22861   4.24601   4.27436   4.28729   4.29545
 Alpha virt. eigenvalues --    4.29882   4.30360   4.30686   4.30763   4.30924
 Alpha virt. eigenvalues --    4.31432   4.31542   4.32091   4.32556   4.32905
 Alpha virt. eigenvalues --    4.33392   4.34381   4.35172   4.35567   4.35758
 Alpha virt. eigenvalues --    4.37343   4.38435   4.39612   4.41720   4.45088
 Alpha virt. eigenvalues --    4.45613   4.46253   4.46680   4.48227   4.49306
 Alpha virt. eigenvalues --    4.51435   4.52230   4.52528   4.54675   4.58203
 Alpha virt. eigenvalues --    4.58870   4.60232   4.60980   4.61708   4.66085
 Alpha virt. eigenvalues --    4.66672   4.68344   4.68891   4.69457   4.70381
 Alpha virt. eigenvalues --    4.73146   4.78669   4.79632   5.02284
          Condensed to atoms (all electrons):
 Mulliken atomic charges:
              1
     1  H    0.629982
     2  H    0.647986
     3  H    0.702819
     4  H    0.696226
     5  H    0.679508
     6  H    0.702080
     7  H    0.694091
     8  H    0.706368
     9  H    0.695936
    10  H    0.639275
    11  H    0.637150
    12  H    0.660430
    13  H    0.656149
    14  H    0.650288
    15  H    0.623122
    16  H    0.644011
    17  H    0.647715
    18  H    0.638858
    19  H    0.643756
    20  H    0.616109
    21  H    0.643225
    22  H    0.726012
    23  H    0.720116
    24  H    0.660351
    25  H    0.656035
    26  H    0.640247
    27  H    0.671442
    28  H    0.667171
    29  H    0.638269
    30  H    0.713295
    31  H    0.692498
    32  H    0.653013
    33  H    0.651266
    34  H    0.650767
    35  H    0.230201
    36  H    0.236917
    37  H    0.211586
    38  H    0.228044
    39  H    0.209217
    40  H    0.249415
    41  H    0.234292
    42  H    0.217997
    43  H    0.219494
    44  H    0.233645
    45  H    0.224166
    46  H    0.217320
    47  H    0.241725
    48  H    0.231007
    49  H    0.214521
    50  H    0.232588
    51  H    0.235298
    52  H    0.214957
    53  H    0.224417
    54  H    0.233092
    55  H    0.216141
    56  H    0.231818
    57  H    0.228369
    58  H    0.211335
    59  H    0.232971
    60  H    0.228392
    61  H    0.236418
    62  H    0.225966
    63  H    0.225599
    64  H    0.234232
    65  H    0.226389
    66  H    0.207463
    67  H    0.227790
    68  H    0.228182
    69  H    0.232260
    70  H    0.222551
    71  H    0.219718
    72  H    0.233921
    73  H    0.216578
    74  H    0.233158
    75  H    0.230937
    76  H    0.212299
    77  H    0.239768
    78  H    0.230816
    79  H    0.230681
    80  H    0.224931
    81  H    0.225362
    82  H    0.231016
    83  H    0.225755
    84  H    0.208038
    85  H    0.229470
    86  H    0.228134
    87  H    0.232702
    88  H    0.222430
    89  H    0.224657
    90  H    0.221748
    91  H    0.231925
    92  H    0.225598
    93  H    0.213166
    94  H    0.226016
    95  H    0.228762
    96  H    0.232202
    97  H    0.220380
    98  H    0.232861
    99  H    0.235272
   100  H    0.214403
   101  H    0.218353
   102  H    0.233159
   103  H    0.224977
   104  H    0.239208
   105  H    0.228956
   106  H    0.219536
   107  H    0.211279
   108  H    0.233266
   109  H    0.230208
   110  H    0.220607
   111  H    0.221624
   112  H    0.233682
   113  H    0.235984
   114  H    0.230613
   115  H    0.233680
   116  C   -0.476969
   117  C   -0.402741
   118  C   -0.448292
   119  C   -0.445287
   120  C   -0.476542
   121  C   -0.505851
   122  C   -0.412481
   123  C   -0.494597
   124  C   -0.392967
   125  C   -0.487538
   126  C   -0.471095
   127  C   -0.411922
   128  C   -0.461728
   129  C   -0.460761
   130  C   -0.474976
   131  C   -0.523375
   132  C   -0.434433
   133  C   -0.485278
   134  C   -0.499726
   135  C   -0.425266
   136  C   -0.444233
   137  C   -0.523479
   138  C   -0.473327
   139  C   -0.483398
   140  C   -0.426180
   141  C   -0.455544
   142  C   -0.520741
   143  C   -0.568807
   144  C   -0.472484
   145  C   -0.602027
   146  C   -0.582217
   147  C   -0.570582
   148  C   -0.539264
   149  C   -0.570733
   150  C   -0.510751
   151  C   -0.507939
   152  O   -1.178001
   153  O   -1.361690
   154  O   -0.831673
   155  O   -1.412075
   156  O   -1.388906
   157  O   -0.825169
   158  O   -1.170738
   159  O   -1.192606
   160  O   -1.175553
   161  O   -0.782292
   162  O   -0.798075
   163  O   -1.159556
   164  O   -0.815633
   165  O   -1.391257
   166  O   -1.179858
   167  O   -0.819134
   168  O   -0.814756
   169  O   -0.849867
   170  O   -0.827690
   171  O   -1.401217
   172  O   -1.129904
 Sum of Mulliken atomic charges =   1.00000
 Mulliken charges with hydrogens summed into heavy atoms:
              1
   116  C    0.209707
   117  C    0.269043
   118  C    0.226839
   119  C    0.241967
   120  C    0.206301
   121  C    0.167800
   122  C    0.259041
   123  C    0.203185
   124  C    0.292830
   125  C    0.174104
   126  C    0.211898
   127  C    0.258295
   128  C    0.214666
   129  C    0.240504
   130  C    0.206334
   131  C    0.139888
   132  C    0.248832
   133  C    0.193052
   134  C    0.165054
   135  C    0.256078
   136  C    0.238303
   137  C    0.153010
   138  C    0.214374
   139  C    0.191355
   140  C    0.249734
   141  C    0.244733
   142  C   -0.520741
   143  C   -0.568807
   144  C   -0.472484
   145  C   -0.602027
   146  C   -0.582217
   147  C   -0.570582
   148  C   -0.539264
   149  C   -0.570733
   150  C   -0.510751
   151  C    0.170765
   152  O    0.099968
   153  O    0.037355
   154  O   -0.152166
   155  O   -0.015904
   156  O    0.013397
   157  O   -0.185894
   158  O    0.126842
   159  O    0.113831
   160  O    0.091579
   161  O   -0.134576
   162  O   -0.159217
   163  O    0.100309
   164  O   -0.172407
   165  O    0.054871
   166  O    0.136527
   167  O   -0.178887
   168  O   -0.143314
   169  O   -0.182697
   170  O   -0.189422
   171  O    0.004575
   172  O    0.825142
 Sum of Mulliken charges with hydrogens summed into heavy atoms =   1.00000
 Electronic spatial extent (au):  <R**2>=          46906.4424
 Charge=              1.0000 electrons
 Dipole moment (field-independent basis, Debye):
    X=             -0.4660    Y=             -0.0762    Z=              7.1118  Tot=              7.1275
 Quadrupole moment (field-independent basis, Debye-Ang):
   XX=           -300.0806   YY=           -299.0062   ZZ=           -349.5940
   XY=             -0.8987   XZ=              0.4735   YZ=             -1.9322
 Traceless Quadrupole moment (field-independent basis, Debye-Ang):
   XX=             16.1463   YY=             17.2207   ZZ=            -33.3670
   XY=             -0.8987   XZ=              0.4735   YZ=             -1.9322
 Octapole moment (field-independent basis, Debye-Ang**2):
  XXX=             22.2997  YYY=             28.8601  ZZZ=            158.3304  XYY=            -30.5657
  XXY=            -42.8308  XXZ=            -25.3107  XZZ=            -10.3915  YZZ=              4.2349
  YYZ=            -29.7810  XYZ=             -2.3231
 Hexadecapole moment (field-independent basis, Debye-Ang**3):
 XXXX=         -21221.6964 YYYY=         -20702.6733 ZZZZ=         -16227.7582 XXXY=            -22.8674
 XXXZ=            283.7544 YYYX=            -21.9602 YYYZ=           -186.5670 ZZZX=             33.3069
 ZZZY=            -25.3363 XXYY=          -6942.3424 XXZZ=          -6082.8462 YYZZ=          -6042.2419
 XXYZ=            152.4646 YYXZ=           -299.1675 ZZXY=             16.4295
 N-N= 1.167674181128D+04 E-N=-3.036356036279D+04  KE= 2.992789406368D+03
 1\1\GINC-NODE220\SP\RB3LYP\6-31+G(d)\C36H115O21(1+)\P253081\27-Jun-201
 4\0\\# sp b3lyp/6-31+g*\\something\\1,1\H,0,-2.55671,-2.08736,-0.55769
 3\H,0,-2.2847,-2.09224,-2.09624\H,0,0.0543254,0.0944451,-1.67846\H,0,0
 .990323,0.429564,-2.88625\H,0,-0.312056,-3.25517,1.04967\H,0,-0.281923
 ,2.49062,1.83393\H,0,-0.759406,3.02051,0.383339\H,0,-0.931786,-1.2868,
 0.57325\H,0,-1.95546,-1.76255,1.67076\H,0,0.53741,3.51816,-1.17042\H,0
 ,2.36786,2.1997,-1.63162\H,0,2.44723,2.76126,-0.155728\H,0,0.657862,-0
 .916713,3.30171\H,0,0.411396,0.642933,3.44771\H,0,-1.22333,1.37509,-2.
 78486\H,0,-1.49065,2.72103,-2.0409\H,0,2.63986,-2.04943,-1.59113\H,0,1
 .47158,-2.90431,2.25583\H,0,-3.18201,0.443799,1.9054\H,0,-2.54586,1.73
 644,1.30092\H,0,3.12966,0.048107,-2.51128\H,0,-0.301002,0.875371,0.410
 336\H,0,0.97344,-0.0870859,0.339251\H,0,1.10149,-3.39238,-0.592567\H,0
 ,0.552372,-2.93375,-2.01305\H,0,1.78658,2.45178,2.64425\H,0,3.06912,1.
 24927,1.27848\H,0,-0.459064,-1.42824,-3.10528\H,0,-1.59219,-0.527267,3
 .31339\H,0,3.03902,-0.785577,0.0306042\H,0,2.50828,-1.06431,1.52775\H,
 0,-2.98264,1.18595,-1.7305\H,0,-3.3872,-0.419716,-1.353\H,0,-3.56807,0
 .79727,-0.189697\H,0,5.69227,-3.41152,-3.12266\H,0,3.93387,-3.33626,-3
 .34525\H,0,4.94314,-1.91707,-3.71139\H,0,5.41639,-4.06576,-0.619489\H,
 0,4.31945,-3.11156,0.394695\H,0,3.66752,-4.10814,-0.923701\H,0,6.75582
 ,-1.91244,-1.23873\H,0,5.86182,-0.487794,-1.79959\H,0,5.67974,-1.05047
 ,-0.123672\H,0,4.49963,-3.80889,4.14581\H,0,3.53337,-4.28683,2.73851\H
 ,0,4.52208,-2.81193,2.67926\H,0,2.36935,-0.754735,4.94728\H,0,3.86527,
 -1.60141,5.39035\H,0,3.77483,-0.715555,3.8576\H,0,2.38613,-3.74428,5.6
 8375\H,0,0.957265,-2.85338,5.11836\H,0,1.46771,-4.34417,4.29456\H,0,-1
 .78956,-4.80807,2.19131\H,0,-1.19186,-6.45854,2.42603\H,0,-0.402136,-5
 .10594,3.26144\H,0,1.11232,-7.12792,1.31384\H,0,2.04284,-5.85536,0.497
 442\H,0,1.83293,-5.81637,2.26339\H,0,0.0426227,-5.49482,-1.02465\H,0,-
 1.00691,-6.62434,-0.146816\H,0,-1.50137,-4.93363,-0.345103\H,0,-1.6191
 9,-4.92455,-5.0096\H,0,-0.765677,-4.95158,-3.45276\H,0,-2.4325,-4.3385
 3,-3.5442\H,0,0.375862,-3.51475,-5.98793\H,0,0.832122,-2.01473,-5.1635
 5\H,0,1.14935,-3.58454,-4.38976\H,0,-2.07283,-2.5907,-6.15437\H,0,-2.9
 0679,-2.11117,-4.66324\H,0,-1.56907,-1.12424,-5.29415\H,0,1.91224,0.10
 4762,-5.31068\H,0,3.39993,0.587939,-6.14473\H,0,3.45344,-0.683822,-4.9
 1139\H,0,5.17179,2.02038,-4.83819\H,0,4.90173,2.30904,-3.10608\H,0,5.2
 7748,0.672743,-3.69541\H,0,2.66898,3.38558,-3.667\H,0,2.81929,3.02176,
 -5.39792\H,0,1.41052,2.43947,-4.49152\H,0,-0.193765,6.61461,-2.96357\H
 ,0,0.966058,5.2743,-2.88398\H,0,-0.690205,4.98559,-3.46792\H,0,0.25838
 8,7.05298,-0.418933\H,0,0.00797247,5.72568,0.731072\H,0,1.38345,5.6800
 3,-0.398066\H,0,-2.20068,6.63081,-1.25326\H,0,-2.63749,5.01535,-1.8406
 6\H,0,-2.34465,5.28364,-0.10669\H,0,-4.17705,-0.448353,5.90866\H,0,-2.
 59759,0.236442,5.47894\H,0,-4.04681,0.69466,4.55451\H,0,-3.13395,-2.84
 373,5.62489\H,0,-2.35271,-3.25235,4.08442\H,0,-1.5889,-2.08638,5.18998
 \H,0,-5.27818,-2.17758,4.25093\H,0,-5.12097,-0.967279,2.9638\H,0,-4.41
 283,-2.58587,2.75625\H,0,5.50969,4.50063,2.03854\H,0,3.96998,4.67304,1
 .17353\H,0,3.9817,4.2808,2.90752\H,0,5.15371,0.730299,2.48425\H,0,6.17
 667,2.10821,2.92451\H,0,4.57575,1.92169,3.67122\H,0,4.81944,2.98179,-0
 .514519\H,0,6.31367,2.64315,0.382696\H,0,5.19673,1.32288,-0.00102136\H
 ,0,2.86936,3.26463,4.75501\H,0,1.78159,3.67007,6.09102\H,0,1.9014,1.98
 917,5.53037\H,0,1.71852,4.93176,3.15744\H,0,-0.0481379,4.87521,2.9752\
 H,0,0.671296,5.43614,4.49519\H,0,-0.610913,1.91834,5.20967\H,0,-0.8088
 25,3.62093,5.67067\H,0,-1.40054,3.05838,4.09653\C,0,4.50063,-3.46451,-
 0.625476\C,0,5.80408,-1.37631,-1.1625\C,0,3.88537,-3.42939,3.32181\C,0
 ,3.20707,-1.33997,4.55538\C,0,1.82498,-3.43735,4.79444\C,0,-0.88477,-5
 .41152,2.32775\C,0,1.34162,-6.05728,1.31455\C,0,-0.641621,-5.59181,-0.
 175876\C,0,-1.47192,-4.3843,-4.0686\C,0,0.439054,-3.02621,-5.00935\C,0
 ,-1.93169,-2.1507,-5.16091\C,0,2.98723,0.269569,-5.18123\C,0,4.73891,1
 .59941,-3.92409\C,0,2.48914,2.62443,-4.43273\C,0,-0.0867377,5.54601,-2
 .74582\C,0,0.331685,5.96769,-0.287177\C,0,-2.0207,5.55931,-1.11677\C,0
 ,-3.54605,-0.131418,5.07069\C,0,-2.54727,-2.43945,4.79248\C,0,-4.60686
 ,-1.78568,3.47973\C,0,4.49111,4.10883,1.954\C,0,5.1422,1.79621,2.74219
 \C,0,5.25492,2.37777,0.287312\C,0,1.89744,3.03509,5.20602\C,0,0.778191
 ,4.71642,3.67627\C,0,-0.597971,2.94669,4.83423\C,0,4.52211,2.62183,1.6
 1122\C,0,0.758458,3.28351,4.21484\C,0,-0.540227,5.24074,-1.31559\C,0,3
 .24367,1.33411,-4.11149\C,0,4.64909,-2.28065,-1.58689\C,0,2.71177,-2.6
 0898,3.86202\C,0,0.0647566,-5.23955,1.1384\C,0,-0.938607,-2.97941,-4.3
 4114\C,0,-3.30325,-1.29662,4.10757\C,0,4.81325,-2.76413,-3.02982\O,0,-
 2.98243,-1.88418,-1.42697\O,0,0.0639173,0.158281,-2.67175\O,0,0.495387
 ,-3.83919,1.08008\O,0,-0.90599,2.33065,1.08307\O,0,-1.49003,-2.0642,0.
 846939\O,0,-0.417319,3.79978,-1.09257\O,0,2.12422,2.96354,-1.06248\O,0
 ,0.0400187,-0.242211,3.66105\O,0,-1.94882,1.99564,-2.53087\O,0,3.44204
 ,-1.45251,-1.5099\O,0,1.89876,-2.14638,2.73247\O,0,-3.36211,1.18139,1.
 27367\O,0,2.6853,0.86868,-2.83841\O,0,0.0374351,0.0184092,0.0314697\O,
 0,1.374,-3.11866,-1.49818\O,0,0.907294,2.35738,3.08797\O,0,3.12115,2.2
 2355,1.45546\O,0,-0.794451,-2.35923,-3.02355\O,0,-2.49418,-0.806807,2.
 99178\O,0,2.63406,-0.364984,0.835639\O,0,-3.63772,0.579772,-1.20348\\V
 ersion=AM64L-G09RevC.01\State=1-A\HF=-3021.0069481\RMSD=1.691e-09\Dipo
 le=2.6453853,-0.3049935,0.8787886\Quadrupole=-20.4980876,10.4767125,10
 .021375,6.1996311,-10.3804613,1.727911\PG=C01 [X(C36H115O21)]\\@


 UNDER MOST GREENE GRASSE LY MOST GREATE SNAKES.
 -- PROVERBS AND REASONS OF THE YEAR 1585
           AS REPRINTED IN PAISLEY MAGAZINE 1828.
 Job cpu time:  0 days 11 hours 44 minutes 29.3 seconds.
 File lengths (MBytes):  RWF=    889 Int=      0 D2E=      0 Chk=     61 Scr=      1
 Normal termination of Gaussian 09 at Fri Jun 27 14:35:25 2014.
