# Supplementary material for: Geometry of the magic number H+(H2O)21water cluster by proxy
Source: Royal Society of Chemistry journal article supplement (doi:10.1039/c4cp05246c), 2015-01-01
Supplement: c4cp05246c3.out [file c4cp05246c3.out]

 Entering Gaussian System, Link 0=g09
 Input=w3.gjf
 Output=w3.out
 Initial command:
 /cm/shared/apps/gaussian/g09/l1.exe /local/10967269.millipede2.cm.cluster/Gau-12966.inp -scrdir=/local/10967269.millipede2.cm.cluster/
 Entering Link 1 = /cm/shared/apps/gaussian/g09/l1.exe PID=     12975.
  
 Copyright (c) 1988,1990,1992,1993,1995,1998,2003,2009,2011,
            Gaussian, Inc.  All Rights Reserved.
  
 This is part of the Gaussian(R) 09 program.  It is based on
 the Gaussian(R) 03 system (copyright 2003, Gaussian, Inc.),
 the Gaussian(R) 98 system (copyright 1998, Gaussian, Inc.),
 the Gaussian(R) 94 system (copyright 1995, Gaussian, Inc.),
 the Gaussian 92(TM) system (copyright 1992, Gaussian, Inc.),
 the Gaussian 90(TM) system (copyright 1990, Gaussian, Inc.),
 the Gaussian 88(TM) system (copyright 1988, Gaussian, Inc.),
 the Gaussian 86(TM) system (copyright 1986, Carnegie Mellon
 University), and the Gaussian 82(TM) system (copyright 1983,
 Carnegie Mellon University). Gaussian is a federally registered
 trademark of Gaussian, Inc.
  
 This software contains proprietary and confidential information,
 including trade secrets, belonging to Gaussian, Inc.
  
 This software is provided under written license and may be
 used, copied, transmitted, or stored only in accord with that
 written license.
  
 The following legend is applicable only to US Government
 contracts under FAR:
  
                    RESTRICTED RIGHTS LEGEND
  
 Use, reproduction and disclosure by the US Government is
 subject to restrictions as set forth in subparagraphs (a)
 and (c) of the Commercial Computer Software - Restricted
 Rights clause in FAR 52.227-19.
  
 Gaussian, Inc.
 340 Quinnipiac St., Bldg. 40, Wallingford CT 06492
  
  
 ---------------------------------------------------------------
 Warning -- This program may not be used in any manner that
 competes with the business of Gaussian, Inc. or will provide
 assistance to any competitor of Gaussian, Inc.  The licensee
 of this program is prohibited from giving any competitor of
 Gaussian, Inc. access to this program.  By using this program,
 the user acknowledges that Gaussian, Inc. is engaged in the
 business of creating and licensing software in the field of
 computational chemistry and represents and warrants to the
 licensee that it is not a competitor of Gaussian, Inc. and that
 it will not use this program in any manner prohibited above.
 ---------------------------------------------------------------
  

 Cite this work as:
 Gaussian 09, Revision C.01,
 M. J. Frisch, G. W. Trucks, H. B. Schlegel, G. E. Scuseria, 
 M. A. Robb, J. R. Cheeseman, G. Scalmani, V. Barone, B. Mennucci, 
 G. A. Petersson, H. Nakatsuji, M. Caricato, X. Li, H. P. Hratchian, 
 A. F. Izmaylov, J. Bloino, G. Zheng, J. L. Sonnenberg, M. Hada, 
 M. Ehara, K. Toyota, R. Fukuda, J. Hasegawa, M. Ishida, T. Nakajima, 
 Y. Honda, O. Kitao, H. Nakai, T. Vreven, J. A. Montgomery, Jr., 
 J. E. Peralta, F. Ogliaro, M. Bearpark, J. J. Heyd, E. Brothers, 
 K. N. Kudin, V. N. Staroverov, T. Keith, R. Kobayashi, J. Normand, 
 K. Raghavachari, A. Rendell, J. C. Burant, S. S. Iyengar, J. Tomasi, 
 M. Cossi, N. Rega, J. M. Millam, M. Klene, J. E. Knox, J. B. Cross, 
 V. Bakken, C. Adamo, J. Jaramillo, R. Gomperts, R. E. Stratmann, 
 O. Yazyev, A. J. Austin, R. Cammi, C. Pomelli, J. W. Ochterski, 
 R. L. Martin, K. Morokuma, V. G. Zakrzewski, G. A. Voth, 
 P. Salvador, J. J. Dannenberg, S. Dapprich, A. D. Daniels, 
 O. Farkas, J. B. Foresman, J. V. Ortiz, J. Cioslowski, 
 and D. J. Fox, Gaussian, Inc., Wallingford CT, 2010.
 
 ******************************************
 Gaussian 09:  AM64L-G09RevC.01 23-Sep-2011
                27-Jun-2014 
 ******************************************
 %chk=w3
 %mem=2GB
 %nprocshared=12
 Will use up to   12 processors via shared memory.
 ------------------
 # sp b3lyp/6-31+g*
 ------------------
 1/38=1/1;
 2/12=2,17=6,18=5,40=1/2;
 3/5=1,6=6,7=11,11=2,16=1,25=1,30=1,74=-5/1,2,3;
 4//1;
 5/5=2,38=5/2;
 6/7=2,8=2,9=2,10=2,28=1/1;
 99/5=1,9=1/99;
 ---------
 something
 ---------
 Charge =  1 Multiplicity = 1
 Symbolic Z-Matrix:
 H                    -2.51186  -2.08757  -0.55914 
 H                    -2.21668  -2.09555  -2.09314 
 H                     0.0719    0.11575  -1.66457 
 H                     1.00888   0.451    -2.87166 
 H                    -0.23635  -3.25664   0.99598 
 H                    -0.26639   2.46595   1.89499 
 H                    -0.67539   3.01436   0.42177 
 H                    -0.90227  -1.29543   0.56986 
 H                    -1.89001  -1.77252   1.69087 
 H                     0.65918   3.53667  -1.18519 
 H                     2.48802   2.29116  -1.73518 
 H                     2.56475   2.85591  -0.26775 
 H                     0.70937  -0.93809   3.48956 
 H                     0.44493   0.6115    3.64546 
 H                    -1.18744   1.39174  -2.74567 
 H                    -1.41217   2.73039  -1.97907 
 H                     2.6209   -2.18037  -1.6082 
 H                     1.45662  -2.83515   2.1909 
 H                    -3.08342   0.41424   1.94782 
 H                    -2.49847   1.72626   1.33321 
 H                     3.04807  -0.0058   -2.40784 
 H                    -0.29131   0.88397   0.44696 
 H                     0.98694  -0.07284   0.35873 
 H                     1.17853  -3.57202  -0.67097 
 H                     0.65761  -3.12157  -2.09572 
 H                     1.76187   2.35644   2.59947 
 H                     2.99574   1.27472   1.20462 
 H                    -0.38448  -1.45535  -3.03826 
 H                    -1.50242  -0.56135   3.40671 
 H                     2.99453  -0.81731   0.0155 
 H                     2.4976   -1.0424    1.53973 
 H                    -2.91398   1.2027   -1.67656 
 H                    -3.31451  -0.41596  -1.33453 
 H                    -3.49515   0.77551  -0.13845 
 H                     6.59028  -4.16087  -3.14731 
 H                     4.81651  -3.98267  -3.27818 
 H                     5.87766  -2.62537  -3.71508 
 H                     6.21017  -4.77029  -0.67294 
 H                     5.27391  -3.60558   0.30827 
 H                     4.4597   -4.5372   -0.96483 
 H                     7.75666  -2.79135  -1.29619 
 H                     6.96722  -1.34668  -1.98601 
 H                     6.70841  -1.76461  -0.278 
 H                     5.19376  -4.11501   5.21524 
 H                     4.21284  -4.71286   3.84842 
 H                     5.16287  -3.22172   3.66912 
 H                     2.92458  -1.17297   5.67192 
 H                     4.39475  -1.93487   6.34998 
 H                     4.42784  -1.18965   4.72634 
 H                     3.01848  -4.09607   6.60685 
 H                     1.63756  -3.19141   5.92144 
 H                     2.18239  -4.69596   5.14785 
 H                    -1.98229  -5.85095   2.18214 
 H                    -1.57468  -7.58148   2.35192 
 H                    -0.64489  -6.34515   3.24404 
 H                     0.65605  -8.35438   1.32588 
 H                     1.64696  -7.1062    0.51972 
 H                     1.44462  -7.07313   2.28622 
 H                    -0.16676  -6.41808  -0.91358 
 H                    -1.27579  -7.63316  -0.21044 
 H                    -1.70909  -5.89932  -0.20559 
 H                    -1.71222  -5.37981  -6.16669 
 H                    -0.81778  -5.37806  -4.61975 
 H                    -2.48663  -4.76935  -4.67711 
 H                     0.21295  -3.97089  -7.13541 
 H                     0.63476  -2.47316  -6.25895 
 H                     0.97845  -4.05366  -5.52235 
 H                    -2.20802  -3.0854   -7.22403 
 H                    -2.95233  -2.62382  -5.66699 
 H                    -1.62899  -1.64689  -6.33668 
 H                     2.47498   0.4536   -6.27939 
 H                     3.85093   1.09201  -7.22217 
 H                     4.10058  -0.22487  -6.04246 
 H                     5.62653   2.43483  -5.91446 
 H                     5.35391   2.62585  -4.15957 
 H                     5.7602    1.02747  -4.82492 
 H                     3.14552   3.54151  -4.48336 
 H                     3.28      3.41862  -6.26306 
 H                     1.93242   2.62525  -5.39883 
 H                    -0.32902   7.79003  -3.1115 
 H                     0.85501   6.46125  -2.94841 
 H                    -0.78476   6.11691  -3.54189 
 H                     0.06688   8.27672  -0.61166 
 H                    -0.15078   6.90981   0.51725 
 H                     1.22037   6.91161  -0.61394 
 H                    -2.31391   7.78307  -1.47138 
 H                    -2.64414   6.11178  -2.00874 
 H                    -2.3749    6.44815  -0.28567 
 H                    -4.86041  -0.86525   6.81685 
 H                    -3.24742  -0.24649   6.35995 
 H                    -4.67746   0.23409   5.42035 
 H                    -3.88162  -3.23471   6.5629 
 H                    -3.09664  -3.61772   5.00483 
 H                    -2.33452  -2.45895   6.11604 
 H                    -5.95915  -2.54378   5.20343 
 H                    -5.71062  -1.33493   3.91189 
 H                    -5.03834  -2.96942   3.73298 
 H                     6.6654    4.83505   2.07519 
 H                     5.11005   4.95866   1.20437 
 H                     5.12358   4.63277   2.95168 
 H                     6.18337   1.16786   2.61393 
 H                     7.32622   2.50097   2.94358 
 H                     5.74079   2.44866   3.76343 
 H                     5.69367   3.21165  -0.35046 
 H                     7.30074   2.9804    0.40226 
 H                     6.16372   1.6093    0.25125 
 H                     2.71524   4.11428   5.72398 
 H                     1.60145   4.49653   7.06527 
 H                     1.76614   2.81596   6.48242 
 H                     1.64318   5.67178   4.22883 
 H                    -0.09655   5.52588   3.89585 
 H                     0.45708   6.16908   5.46765 
 H                    -0.59429   2.62502   6.02848 
 H                    -0.91359   4.2948    6.58329 
 H                    -1.384     3.78171   4.93739 
 H                    -2.96754  -1.14625   3.77658 
 H                     2.45057  -2.50851   3.43509 
 H                     0.32907  -4.75438   1.13579 
 H                     0.91611   2.95976   3.85649 
 H                     3.96053   2.50913   1.56318 
 H                    -0.83032  -2.74965  -3.90735 
 H                    -0.40949   4.75458  -1.20254 
 H                     3.15803   1.04215  -3.65445 
 H                     4.21212  -1.97014  -1.58146 
 C                     5.39105  -4.02995  -0.69435 
 C                     6.83904  -2.17695  -1.2839 
 C                     4.55747  -3.81132   4.36537 
 C                     3.81291  -1.7635    5.42735 
 C                     2.516    -3.7941    5.6714 
 C                    -1.15713  -6.56059   2.3006 
 C                     0.94232  -7.28808   1.33728 
 C                    -0.88059  -6.60764  -0.10614 
 C                    -1.54198  -4.82566  -5.22696 
 C                     0.26557  -3.49717  -6.13917 
 C                    -2.01009  -2.66673  -6.22177 
 C                     3.54174   0.69597  -6.23893 
 C                     5.2089    1.95491  -5.01205 
 C                     2.9953    2.88029  -5.34236 
 C                    -0.20203   6.72624  -2.84404 
 C                     0.16658   7.18313  -0.49436 
 C                    -2.07106   6.71948  -1.3017 
 C                    -4.21006  -0.59011   5.96794 
 C                    -3.2926   -2.81819   5.72671 
 C                    -5.24613  -2.1677    4.44889 
 C                     5.6389    4.4344    2.00629 
 C                     6.25996   2.24008   2.82243 
 C                     6.23721   2.68544   0.44028 
 C                     1.74729   3.86516   6.1713 
 C                     0.67031   5.43427   4.67156 
 C                    -0.62406   3.67391   5.71759 
 C                     5.7445   -3.46239  -3.02207 
 N                    -3.99051  -1.71789   5.05764 
 N                     3.4023   -3.02172   4.79635 
 N                    -0.21752  -6.40646   1.18727 
 N                     0.68576   4.06066   5.18098 
 N                     5.6284    2.99391   1.73777 
 N                    -1.03897  -3.47077  -5.47367 
 N                    -0.64003   6.44986  -1.47267 
 N                     3.78265   1.65538  -5.15868 
 N                     5.65228  -2.95063  -1.6519 
 O                    -2.92875  -1.88484  -1.43487 
 O                     0.0809    0.17088  -2.65836 
 O                     0.60194  -3.79234   1.02511 
 O                    -0.88505   2.34491   1.12761 
 O                    -1.46057  -2.07259   0.84558 
 O                    -0.30483   3.7632   -1.05757 
 O                     2.31967   3.0973   -1.19261 
 O                     0.11708  -0.27749   3.91941 
 O                    -1.89941   2.02552  -2.478 
 O                     3.33602  -1.48237  -1.51665 
 O                     1.87664  -2.10423   2.71613 
 O                    -3.30279   1.14957   1.32057 
 O                     2.69258   0.83784  -2.78746 
 O                     0.04889   0.03484   0.05203 
 O                     1.46582  -3.40775  -1.60195 
 O                     0.9199    2.27718   3.11776 
 O                     3.00707   2.2499    1.38394 
 O                    -0.71758  -2.38752  -2.97505 
 O                    -2.38883  -0.81293   3.02325 
 O                     2.64102  -0.3626    0.82788 
 O                    -3.5678    0.58047  -1.16063 
 
 Stoichiometry    C27H124N9O21(1+)
 Framework group  C1[X(C27H124N9O21)]
 Deg. of freedom   537
 Full point group                 C1      NOp   1
 Largest Abelian subgroup         C1      NOp   1
 Largest concise Abelian subgroup C1      NOp   1
                         Standard orientation:                         
 ---------------------------------------------------------------------
 Center     Atomic      Atomic             Coordinates (Angstroms)
 Number     Number       Type             X           Y           Z
 ---------------------------------------------------------------------
      1          1           0       -1.716227   -1.797584   -3.194093
      2          1           0       -0.506768   -2.765187   -3.397358
      3          1           0        1.291208   -0.921155   -1.479565
      4          1           0        2.690080   -1.462691   -1.035390
      5          1           0       -2.752962   -1.921269   -0.388214
      6          1           0       -0.006534    3.134583   -1.061002
      7          1           0        1.246714    2.690816   -1.994200
      8          1           0       -1.506185   -0.593451   -1.462378
      9          1           0       -2.944696   -0.212792   -1.958059
     10          1           0        3.184414    2.023648   -1.333602
     11          1           0        3.473816    0.579632    0.406942
     12          1           0        2.772887    1.918676    0.847210
     13          1           0       -2.852642    1.366762    0.902862
     14          1           0       -2.134134    2.699890    0.453413
     15          1           0        2.399438   -0.493042   -3.203340
     16          1           0        2.563290    1.045932   -3.390082
     17          1           0        0.764316   -2.869771    1.294971
     18          1           0       -2.782646   -0.974099    1.502186
     19          1           0       -2.241230    1.748004   -3.348241
     20          1           0       -0.811852    2.362754   -3.205915
     21          1           0        2.787035   -1.678935    1.092031
     22          1           0        0.092352    1.003518   -1.282031
     23          1           0        0.028521    0.108019    0.041298
     24          1           0       -1.242942   -3.289875    0.464342
     25          1           0       -0.121901   -3.773224   -0.542540
     26          1           0        0.119022    3.339935    1.075397
     27          1           0        0.912705    1.547833    1.967921
     28          1           0        1.193454   -2.968162   -2.082774
     29          1           0       -3.333169    1.765654   -1.253710
     30          1           0        0.528286   -0.827371    1.932791
     31          1           0       -0.882692   -0.035150    1.981944
     32          1           0        0.914599    0.133617   -4.453229
     33          1           0       -0.436030   -0.902362   -4.458774
     34          1           0       -0.655957    0.781176   -4.445834
     35          1           0        2.073372   -5.647080    4.847455
     36          1           0        1.660897   -5.464209    3.117841
     37          1           0        3.153116   -4.737838    3.754120
     38          1           0       -0.214949   -4.582582    5.365913
     39          1           0       -0.556389   -2.999513    4.608798
     40          1           0       -0.469938   -4.456897    3.598752
     41          1           0        1.950503   -3.515054    6.297295
     42          1           0        3.038059   -2.746807    5.108532
     43          1           0        1.461340   -2.010093    5.469314
     44          1           0       -4.444986   -0.385121    6.154133
     45          1           0       -4.149445   -1.625833    4.904688
     46          1           0       -2.802693   -0.628462    5.496055
     47          1           0       -3.808529    2.366966    3.697658
     48          1           0       -4.245433    2.081511    5.409174
     49          1           0       -2.613006    1.669692    4.810639
     50          1           0       -6.194956    0.634075    4.551752
     51          1           0       -5.636822    1.021155    2.898334
     52          1           0       -5.783709   -0.674818    3.409267
     53          1           0       -5.762030   -3.113875   -1.230186
     54          1           0       -6.774901   -4.399525   -0.515413
     55          1           0       -6.363677   -2.944085    0.434057
     56          1           0       -5.719869   -5.791540    1.375479
     57          1           0       -4.049234   -5.372636    1.847975
     58          1           0       -5.380192   -4.249128    2.206916
     59          1           0       -3.227570   -5.584634   -0.409754
     60          1           0       -4.844651   -6.032502   -1.030424
     61          1           0       -3.965297   -4.635358   -1.715041
     62          1           0        0.664719   -7.882586   -3.670302
     63          1           0       -0.146373   -6.994401   -2.348822
     64          1           0       -0.319427   -6.435001   -4.026920
     65          1           0        2.872082   -7.501672   -2.400571
     66          1           0        3.274660   -5.814966   -1.973661
     67          1           0        1.918112   -6.630493   -1.165345
     68          1           0        2.626416   -6.691555   -4.837047
     69          1           0        1.515096   -5.321815   -5.120255
     70          1           0        3.040204   -5.055659   -4.250019
     71          1           0        5.669236   -3.652355   -0.731948
     72          1           0        7.208893   -3.823678    0.156731
     73          1           0        5.655595   -4.153504    0.973248
     74          1           0        7.674792   -2.088177    2.010646
     75          1           0        6.422024   -0.842648    2.274615
     76          1           0        6.092859   -2.536454    2.705026
     77          1           0        6.438346   -0.167767   -0.041531
     78          1           0        7.701903   -1.365336   -0.453565
     79          1           0        6.136709   -1.366072   -1.315230
     80          1           0        6.772608    4.257079   -3.550564
     81          1           0        6.272421    3.229600   -2.176426
     82          1           0        5.930434    2.708326   -3.841036
     83          1           0        5.387103    6.145805   -2.475449
     84          1           0        3.679206    5.777851   -2.104020
     85          1           0        4.974604    4.990431   -1.175825
     86          1           0        4.892896    5.395124   -4.892722
     87          1           0        4.172774    3.773503   -5.099570
     88          1           0        3.217065    5.076316   -4.362077
     89          1           0       -7.147884    3.850868   -3.277897
     90          1           0       -5.890201    3.945664   -2.011956
     91          1           0       -5.417373    3.846586   -3.722346
     92          1           0       -8.036578    1.763044   -2.058022
     93          1           0       -6.863646    0.451670   -1.749800
     94          1           0       -6.715449    1.992087   -0.876006
     95          1           0       -7.358008    1.616820   -4.539923
     96          1           0       -5.615678    1.758531   -4.907842
     97          1           0       -6.227010    0.316233   -4.070241
     98          1           0        3.671448    4.628620    5.098150
     99          1           0        3.838449    4.299563    3.349850
    100          1           0        2.382257    5.113919    3.962882
    101          1           0        0.929845    2.107217    5.409629
    102          1           0        1.880182    3.279050    6.366512
    103          1           0        0.706298    3.850624    5.148407
    104          1           0        4.126940    1.930976    3.691489
    105          1           0        3.999332    2.099326    5.468597
    106          1           0        2.898876    1.006765    4.579305
    107          1           0       -0.769402    6.573266    2.662140
    108          1           0       -1.899353    7.773871    1.978428
    109          1           0       -2.420845    6.082746    2.221931
    110          1           0        0.871456    6.955930    0.938264
    111          1           0        0.424235    6.757487   -0.770369
    112          1           0       -0.140688    8.189216    0.136151
    113          1           0       -3.021884    5.817697   -0.098125
    114          1           0       -2.539965    7.493850   -0.493342
    115          1           0       -1.815039    6.113272   -1.366277
    116          1           0       -4.456446    1.633871   -2.414042
    117          1           0       -3.146319   -0.022885    2.769298
    118          1           0       -3.550862   -3.053089    0.427145
    119          1           0       -0.725455    4.644209    0.580282
    120          1           0        1.721708    2.672084    2.783229
    121          1           0        0.898390   -4.488629   -2.562798
    122          1           0        3.552801    3.045292   -2.536183
    123          1           0        4.353025   -1.626657    0.634579
    124          1           0        1.420507   -2.798251    2.758252
    125          6           0       -0.041764   -3.956463    4.472884
    126          6           0        1.990173   -2.960525    5.343048
    127          6           0       -3.868036   -0.623346    5.243228
    128          6           0       -3.675714    1.690780    4.547837
    129          6           0       -5.510705    0.332733    3.739513
    130          6           0       -5.985199   -3.656734   -0.306059
    131          6           0       -4.993996   -4.965454    1.474297
    132          6           0       -4.172747   -5.189065   -0.793956
    133          6           0        0.372389   -6.882021   -3.306202
    134          6           0        2.450193   -6.521575   -2.115805
    135          6           0        2.217633   -5.761149   -4.405507
    136          6           0        6.153233   -3.510779    0.239681
    137          6           0        6.590262   -1.883335    1.980374
    138          6           0        6.615299   -1.204444   -0.344263
    139          6           0        5.988995    3.575362   -3.175703
    140          6           0        4.685164    5.350434   -2.168354
    141          6           0        4.220365    4.645561   -4.440120
    142          6           0       -6.143625    3.501595   -2.979945
    143          6           0       -6.978541    1.537058   -1.836360
    144          6           0       -6.340364    1.400502   -4.170096
    145          6           0        3.127721    4.342286    4.180902
    146          6           0        1.443830    3.073383    5.373059
    147          6           0        3.428238    1.964289    4.533098
    148          6           0       -1.576869    6.718711    1.936932
    149          6           0        0.072529    7.108036    0.205132
    150          6           0       -2.182035    6.454316   -0.393217
    151          6           0        2.106084   -4.962102    3.982217
    152          7           0       -6.079489    2.040746   -2.877223
    153          7           0       -4.109712    0.342289    4.169556
    154          7           0       -4.761270   -4.283441    0.199282
    155          7           0       -1.109614    6.338694    0.601622
    156          7           0        2.460754    3.044982    4.320122
    157          7           0        1.532244   -6.002211   -3.132188
    158          7           0        4.678671    4.229387   -3.111010
    159          7           0        6.024857   -2.110081    0.648341
    160          7           0        1.385668   -3.712692    4.242492
    161          8           0       -1.104777   -2.146311   -3.891463
    162          8           0        2.047634   -1.487938   -1.791520
    163          8           0       -2.803218   -2.382979    0.492045
    164          8           0        0.263729    2.611565   -1.860791
    165          8           0       -2.362080   -0.997094   -1.772563
    166          8           0        2.893399    2.346963   -2.232320
    167          8           0        3.502403    1.558328    0.288952
    168          8           0       -2.975649    2.191202    0.376419
    169          8           0        2.336636    0.219116   -3.888257
    170          8           0        1.361037   -2.314016    1.879815
    171          8           0       -2.582791   -0.105998    1.941487
    172          8           0       -1.424376    1.957024   -3.869134
    173          8           0        3.441798   -1.223382    0.503842
    174          8           0       -0.009439    0.069641   -0.950000
    175          8           0       -0.370794   -3.751550    0.414800
    176          8           0       -0.595149    3.653819    0.462814
    177          8           0        1.367473    2.424277    1.876850
    178          8           0        0.477184   -3.639712   -2.223746
    179          8           0       -3.511600    1.393964   -2.162590
    180          8           0        0.087900    0.053149    1.782996
    181          8           0       -0.056200    0.005817   -4.802594
 ---------------------------------------------------------------------
 Rotational constants (GHZ):      0.0263499      0.0261748      0.0219976
 Standard basis: 6-31+G(d) (6D, 7F)
 There are  1331 symmetry adapted basis functions of A   symmetry.
 Integral buffers will be    131072 words long.
 Raffenetti 2 integral format.
 Two-electron integral symmetry is turned on.
  1331 basis functions,  2320 primitive gaussians,  1331 cartesian basis functions
   258 alpha electrons      258 beta electrons
       nuclear repulsion energy     11165.0401712733 Hartrees.
 NAtoms=  181 NActive=  181 NUniq=  181 SFac= 1.00D+00 NAtFMM=   60 NAOKFM=T Big=T
 One-electron integrals computed using PRISM.
 NBasis=  1331 RedAO= T  NBF=  1331
 NBsUse=  1331 1.00D-06 NBFU=  1331
 Harris functional with IExCor=  402 diagonalized for initial guess.
 ExpMin= 4.38D-02 ExpMax= 5.48D+03 ExpMxC= 8.25D+02 IAcc=2 IRadAn=         4 AccDes= 0.00D+00
 HarFok:  IExCor=  402 AccDes= 0.00D+00 IRadAn=         4 IDoV= 1
 ScaDFX=  1.000000  1.000000  1.000000  1.000000
 FoFCou: FMM=F IPFlag=           0 FMFlag=      100000 FMFlg1=        2001
         NFxFlg=           0 DoJE=T BraDBF=F KetDBF=T FulRan=T
         Omega=  0.000000  0.000000  1.000000  0.000000  0.000000 ICntrl=     500 IOpCl=  0
         NMat0=    1 NMatS0=    1 NMatT0=    0 NMatD0=    1 NMtDS0=    0 NMtDT0=    0
         I1Cent=           4 NGrid=           0.
 Petite list used in FoFCou.
 Initial guess orbital symmetries:
       Occupied  (A) (A) (A) (A) (A) (A) (A) (A) (A) (A) (A) (A)
                 (A) (A) (A) (A) (A) (A) (A) (A) (A) (A) (A) (A)
                 (A) (A) (A) (A) (A) (A) (A) (A) (A) (A) (A) (A)
                 (A) (A) (A) (A) (A) (A) (A) (A) (A) (A) (A) (A)
                 (A) (A) (A) (A) (A) (A) (A) (A) (A) (A) (A) (A)
                 (A) (A) (A) (A) (A) (A) (A) (A) (A) (A) (A) (A)
                 (A) (A) (A) (A) (A) (A) (A) (A) (A) (A) (A) (A)
                 (A) (A) (A) (A) (A) (A) (A) (A) (A) (A) (A) (A)
                 (A) (A) (A) (A) (A) (A) (A) (A) (A) (A) (A) (A)
                 (A) (A) (A) (A) (A) (A) (A) (A) (A) (A) (A) (A)
                 (A) (A) (A) (A) (A) (A) (A) (A) (A) (A) (A) (A)
                 (A) (A) (A) (A) (A) (A) (A) (A) (A) (A) (A) (A)
                 (A) (A) (A) (A) (A) (A) (A) (A) (A) (A) (A) (A)
                 (A) (A) (A) (A) (A) (A) (A) (A) (A) (A) (A) (A)
                 (A) (A) (A) (A) (A) (A) (A) (A) (A) (A) (A) (A)
                 (A) (A) (A) (A) (A) (A) (A) (A) (A) (A) (A) (A)
                 (A) (A) (A) (A) (A) (A) (A) (A) (A) (A) (A) (A)
                 (A) (A) (A) (A) (A) (A) (A) (A) (A) (A) (A) (A)
                 (A) (A) (A) (A) (A) (A) (A) (A) (A) (A) (A) (A)
                 (A) (A) (A) (A) (A) (A) (A) (A) (A) (A) (A) (A)
                 (A) (A) (A) (A) (A) (A) (A) (A) (A) (A) (A) (A)
                 (A) (A) (A) (A) (A) (A)
       Virtual   (A) (A) (A) (A) (A) (A) (A) (A) (A) (A) (A) (A)
                 (A) (A) (A) (A) (A) (A) (A) (A) (A) (A) (A) (A)
                 (A) (A) (A) (A) (A) (A) (A) (A) (A) (A) (A) (A)
                 (A) (A) (A) (A) (A) (A) (A) (A) (A) (A) (A) (A)
                 (A) (A) (A) (A) (A) (A) (A) (A) (A) (A) (A) (A)
                 (A) (A) (A) (A) (A) (A) (A) (A) (A) (A) (A) (A)
                 (A) (A) (A) (A) (A) (A) (A) (A) (A) (A) (A) (A)
                 (A) (A) (A) (A) (A) (A) (A) (A) (A) (A) (A) (A)
                 (A) (A) (A) (A) (A) (A) (A) (A) (A) (A) (A) (A)
                 (A) (A) (A) (A) (A) (A) (A) (A) (A) (A) (A) (A)
                 (A) (A) (A) (A) (A) (A) (A) (A) (A) (A) (A) (A)
                 (A) (A) (A) (A) (A) (A) (A) (A) (A) (A) (A) (A)
                 (A) (A) (A) (A) (A) (A) (A) (A) (A) (A) (A) (A)
                 (A) (A) (A) (A) (A) (A) (A) (A) (A) (A) (A) (A)
                 (A) (A) (A) (A) (A) (A) (A) (A) (A) (A) (A) (A)
                 (A) (A) (A) (A) (A) (A) (A) (A) (A) (A) (A) (A)
                 (A) (A) (A) (A) (A) (A) (A) (A) (A) (A) (A) (A)
                 (A) (A) (A) (A) (A) (A) (A) (A) (A) (A) (A) (A)
                 (A) (A) (A) (A) (A) (A) (A) (A) (A) (A) (A) (A)
                 (A) (A) (A) (A) (A) (A) (A) (A) (A) (A) (A) (A)
                 (A) (A) (A) (A) (A) (A) (A) (A) (A) (A) (A) (A)
                 (A) (A) (A) (A) (A) (A) (A) (A) (A) (A) (A) (A)
                 (A) (A) (A) (A) (A) (A) (A) (A) (A) (A) (A) (A)
                 (A) (A) (A) (A) (A) (A) (A) (A) (A) (A) (A) (A)
                 (A) (A) (A) (A) (A) (A) (A) (A) (A) (A) (A) (A)
                 (A) (A) (A) (A) (A) (A) (A) (A) (A) (A) (A) (A)
                 (A) (A) (A) (A) (A) (A) (A) (A) (A) (A) (A) (A)
                 (A) (A) (A) (A) (A) (A) (A) (A) (A) (A) (A) (A)
                 (A) (A) (A) (A) (A) (A) (A) (A) (A) (A) (A) (A)
                 (A) (A) (A) (A) (A) (A) (A) (A) (A) (A) (A) (A)
                 (A) (A) (A) (A) (A) (A) (A) (A) (A) (A) (A) (A)
                 (A) (A) (A) (A) (A) (A) (A) (A) (A) (A) (A) (A)
                 (A) (A) (A) (A) (A) (A) (A) (A) (A) (A) (A) (A)
                 (A) (A) (A) (A) (A) (A) (A) (A) (A) (A) (A) (A)
                 (A) (A) (A) (A) (A) (A) (A) (A) (A) (A) (A) (A)
                 (A) (A) (A) (A) (A) (A) (A) (A) (A) (A) (A) (A)
                 (A) (A) (A) (A) (A) (A) (A) (A) (A) (A) (A) (A)
                 (A) (A) (A) (A) (A) (A) (A) (A) (A) (A) (A) (A)
                 (A) (A) (A) (A) (A) (A) (A) (A) (A) (A) (A) (A)
                 (A) (A) (A) (A) (A) (A) (A) (A) (A) (A) (A) (A)
                 (A) (A) (A) (A) (A) (A) (A) (A) (A) (A) (A) (A)
                 (A) (A) (A) (A) (A) (A) (A) (A) (A) (A) (A) (A)
                 (A) (A) (A) (A) (A) (A) (A) (A) (A) (A) (A) (A)
                 (A) (A) (A) (A) (A) (A) (A) (A) (A) (A) (A) (A)
                 (A) (A) (A) (A) (A) (A) (A) (A) (A) (A) (A) (A)
                 (A) (A) (A) (A) (A) (A) (A) (A) (A) (A) (A) (A)
                 (A) (A) (A) (A) (A) (A) (A) (A) (A) (A) (A) (A)
                 (A) (A) (A) (A) (A) (A) (A) (A) (A) (A) (A) (A)
                 (A) (A) (A) (A) (A) (A) (A) (A) (A) (A) (A) (A)
                 (A) (A) (A) (A) (A) (A) (A) (A) (A) (A) (A) (A)
                 (A) (A) (A) (A) (A) (A) (A) (A) (A) (A) (A) (A)
                 (A) (A) (A) (A) (A) (A) (A) (A) (A) (A) (A) (A)
                 (A) (A) (A) (A) (A) (A) (A) (A) (A) (A) (A) (A)
                 (A) (A) (A) (A) (A) (A) (A) (A) (A) (A) (A) (A)
                 (A) (A) (A) (A) (A) (A) (A) (A) (A) (A) (A) (A)
                 (A) (A) (A) (A) (A) (A) (A) (A) (A) (A) (A) (A)
                 (A) (A) (A) (A) (A) (A) (A) (A) (A) (A) (A) (A)
                 (A) (A) (A) (A) (A) (A) (A) (A) (A) (A) (A) (A)
                 (A) (A) (A) (A) (A) (A) (A) (A) (A) (A) (A) (A)
                 (A) (A) (A) (A) (A) (A) (A) (A) (A) (A) (A) (A)
                 (A) (A) (A) (A) (A) (A) (A) (A) (A) (A) (A) (A)
                 (A) (A) (A) (A) (A) (A) (A) (A) (A) (A) (A) (A)
                 (A) (A) (A) (A) (A) (A) (A) (A) (A) (A) (A) (A)
                 (A) (A) (A) (A) (A) (A) (A) (A) (A) (A) (A) (A)
                 (A) (A) (A) (A) (A) (A) (A) (A) (A) (A) (A) (A)
                 (A) (A) (A) (A) (A) (A) (A) (A) (A) (A) (A) (A)
                 (A) (A) (A) (A) (A) (A) (A) (A) (A) (A) (A) (A)
                 (A) (A) (A) (A) (A) (A) (A) (A) (A) (A) (A) (A)
                 (A) (A) (A) (A) (A) (A) (A) (A) (A) (A) (A) (A)
                 (A) (A) (A) (A) (A) (A) (A) (A) (A) (A) (A) (A)
                 (A) (A) (A) (A) (A) (A) (A) (A) (A) (A) (A) (A)
                 (A) (A) (A) (A) (A) (A) (A) (A) (A) (A) (A) (A)
                 (A) (A) (A) (A) (A) (A) (A) (A) (A) (A) (A) (A)
                 (A) (A) (A) (A) (A) (A) (A) (A) (A) (A) (A) (A)
                 (A) (A) (A) (A) (A) (A) (A) (A) (A) (A) (A) (A)
                 (A) (A) (A) (A) (A) (A) (A) (A) (A) (A) (A) (A)
                 (A) (A) (A) (A) (A) (A) (A) (A) (A) (A) (A) (A)
                 (A) (A) (A) (A) (A) (A) (A) (A) (A) (A) (A) (A)
                 (A) (A) (A) (A) (A) (A) (A) (A) (A) (A) (A) (A)
                 (A) (A) (A) (A) (A) (A) (A) (A) (A) (A) (A) (A)
                 (A) (A) (A) (A) (A) (A) (A) (A) (A) (A) (A) (A)
                 (A) (A) (A) (A) (A) (A) (A) (A) (A) (A) (A) (A)
                 (A) (A) (A) (A) (A) (A) (A) (A) (A) (A) (A) (A)
                 (A) (A) (A) (A) (A) (A) (A) (A) (A) (A) (A) (A)
                 (A) (A) (A) (A) (A) (A) (A) (A) (A) (A) (A) (A)
                 (A) (A) (A) (A) (A) (A) (A) (A) (A) (A) (A) (A)
                 (A) (A) (A) (A) (A) (A) (A) (A) (A) (A) (A) (A)
                 (A) (A) (A) (A) (A) (A) (A) (A) (A) (A) (A) (A)
                 (A) (A) (A) (A) (A) (A) (A) (A) (A) (A) (A) (A)
                 (A) (A) (A) (A) (A)
 The electronic state of the initial guess is 1-A.
 Requested convergence on RMS density matrix=1.00D-08 within 128 cycles.
 Requested convergence on MAX density matrix=1.00D-06.
 Requested convergence on             energy=1.00D-06.
 No special actions if energy rises.
 SCF Done:  E(RB3LYP) =  -3176.16934978     A.U. after   11 cycles
             Convg  =    0.7218D-08             -V/T =  2.0096

 **********************************************************************

            Population analysis using the SCF density.

 **********************************************************************

 Orbital symmetries:
       Occupied  (A) (A) (A) (A) (A) (A) (A) (A) (A) (A) (A) (A)
                 (A) (A) (A) (A) (A) (A) (A) (A) (A) (A) (A) (A)
                 (A) (A) (A) (A) (A) (A) (A) (A) (A) (A) (A) (A)
                 (A) (A) (A) (A) (A) (A) (A) (A) (A) (A) (A) (A)
                 (A) (A) (A) (A) (A) (A) (A) (A) (A) (A) (A) (A)
                 (A) (A) (A) (A) (A) (A) (A) (A) (A) (A) (A) (A)
                 (A) (A) (A) (A) (A) (A) (A) (A) (A) (A) (A) (A)
                 (A) (A) (A) (A) (A) (A) (A) (A) (A) (A) (A) (A)
                 (A) (A) (A) (A) (A) (A) (A) (A) (A) (A) (A) (A)
                 (A) (A) (A) (A) (A) (A) (A) (A) (A) (A) (A) (A)
                 (A) (A) (A) (A) (A) (A) (A) (A) (A) (A) (A) (A)
                 (A) (A) (A) (A) (A) (A) (A) (A) (A) (A) (A) (A)
                 (A) (A) (A) (A) (A) (A) (A) (A) (A) (A) (A) (A)
                 (A) (A) (A) (A) (A) (A) (A) (A) (A) (A) (A) (A)
                 (A) (A) (A) (A) (A) (A) (A) (A) (A) (A) (A) (A)
                 (A) (A) (A) (A) (A) (A) (A) (A) (A) (A) (A) (A)
                 (A) (A) (A) (A) (A) (A) (A) (A) (A) (A) (A) (A)
                 (A) (A) (A) (A) (A) (A) (A) (A) (A) (A) (A) (A)
                 (A) (A) (A) (A) (A) (A) (A) (A) (A) (A) (A) (A)
                 (A) (A) (A) (A) (A) (A) (A) (A) (A) (A) (A) (A)
                 (A) (A) (A) (A) (A) (A) (A) (A) (A) (A) (A) (A)
                 (A) (A) (A) (A) (A) (A)
       Virtual   (A) (A) (A) (A) (A) (A) (A) (A) (A) (A) (A) (A)
                 (A) (A) (A) (A) (A) (A) (A) (A) (A) (A) (A) (A)
                 (A) (A) (A) (A) (A) (A) (A) (A) (A) (A) (A) (A)
                 (A) (A) (A) (A) (A) (A) (A) (A) (A) (A) (A) (A)
                 (A) (A) (A) (A) (A) (A) (A) (A) (A) (A) (A) (A)
                 (A) (A) (A) (A) (A) (A) (A) (A) (A) (A) (A) (A)
                 (A) (A) (A) (A) (A) (A) (A) (A) (A) (A) (A) (A)
                 (A) (A) (A) (A) (A) (A) (A) (A) (A) (A) (A) (A)
                 (A) (A) (A) (A) (A) (A) (A) (A) (A) (A) (A) (A)
                 (A) (A) (A) (A) (A) (A) (A) (A) (A) (A) (A) (A)
                 (A) (A) (A) (A) (A) (A) (A) (A) (A) (A) (A) (A)
                 (A) (A) (A) (A) (A) (A) (A) (A) (A) (A) (A) (A)
                 (A) (A) (A) (A) (A) (A) (A) (A) (A) (A) (A) (A)
                 (A) (A) (A) (A) (A) (A) (A) (A) (A) (A) (A) (A)
                 (A) (A) (A) (A) (A) (A) (A) (A) (A) (A) (A) (A)
                 (A) (A) (A) (A) (A) (A) (A) (A) (A) (A) (A) (A)
                 (A) (A) (A) (A) (A) (A) (A) (A) (A) (A) (A) (A)
                 (A) (A) (A) (A) (A) (A) (A) (A) (A) (A) (A) (A)
                 (A) (A) (A) (A) (A) (A) (A) (A) (A) (A) (A) (A)
                 (A) (A) (A) (A) (A) (A) (A) (A) (A) (A) (A) (A)
                 (A) (A) (A) (A) (A) (A) (A) (A) (A) (A) (A) (A)
                 (A) (A) (A) (A) (A) (A) (A) (A) (A) (A) (A) (A)
                 (A) (A) (A) (A) (A) (A) (A) (A) (A) (A) (A) (A)
                 (A) (A) (A) (A) (A) (A) (A) (A) (A) (A) (A) (A)
                 (A) (A) (A) (A) (A) (A) (A) (A) (A) (A) (A) (A)
                 (A) (A) (A) (A) (A) (A) (A) (A) (A) (A) (A) (A)
                 (A) (A) (A) (A) (A) (A) (A) (A) (A) (A) (A) (A)
                 (A) (A) (A) (A) (A) (A) (A) (A) (A) (A) (A) (A)
                 (A) (A) (A) (A) (A) (A) (A) (A) (A) (A) (A) (A)
                 (A) (A) (A) (A) (A) (A) (A) (A) (A) (A) (A) (A)
                 (A) (A) (A) (A) (A) (A) (A) (A) (A) (A) (A) (A)
                 (A) (A) (A) (A) (A) (A) (A) (A) (A) (A) (A) (A)
                 (A) (A) (A) (A) (A) (A) (A) (A) (A) (A) (A) (A)
                 (A) (A) (A) (A) (A) (A) (A) (A) (A) (A) (A) (A)
                 (A) (A) (A) (A) (A) (A) (A) (A) (A) (A) (A) (A)
                 (A) (A) (A) (A) (A) (A) (A) (A) (A) (A) (A) (A)
                 (A) (A) (A) (A) (A) (A) (A) (A) (A) (A) (A) (A)
                 (A) (A) (A) (A) (A) (A) (A) (A) (A) (A) (A) (A)
                 (A) (A) (A) (A) (A) (A) (A) (A) (A) (A) (A) (A)
                 (A) (A) (A) (A) (A) (A) (A) (A) (A) (A) (A) (A)
                 (A) (A) (A) (A) (A) (A) (A) (A) (A) (A) (A) (A)
                 (A) (A) (A) (A) (A) (A) (A) (A) (A) (A) (A) (A)
                 (A) (A) (A) (A) (A) (A) (A) (A) (A) (A) (A) (A)
                 (A) (A) (A) (A) (A) (A) (A) (A) (A) (A) (A) (A)
                 (A) (A) (A) (A) (A) (A) (A) (A) (A) (A) (A) (A)
                 (A) (A) (A) (A) (A) (A) (A) (A) (A) (A) (A) (A)
                 (A) (A) (A) (A) (A) (A) (A) (A) (A) (A) (A) (A)
                 (A) (A) (A) (A) (A) (A) (A) (A) (A) (A) (A) (A)
                 (A) (A) (A) (A) (A) (A) (A) (A) (A) (A) (A) (A)
                 (A) (A) (A) (A) (A) (A) (A) (A) (A) (A) (A) (A)
                 (A) (A) (A) (A) (A) (A) (A) (A) (A) (A) (A) (A)
                 (A) (A) (A) (A) (A) (A) (A) (A) (A) (A) (A) (A)
                 (A) (A) (A) (A) (A) (A) (A) (A) (A) (A) (A) (A)
                 (A) (A) (A) (A) (A) (A) (A) (A) (A) (A) (A) (A)
                 (A) (A) (A) (A) (A) (A) (A) (A) (A) (A) (A) (A)
                 (A) (A) (A) (A) (A) (A) (A) (A) (A) (A) (A) (A)
                 (A) (A) (A) (A) (A) (A) (A) (A) (A) (A) (A) (A)
                 (A) (A) (A) (A) (A) (A) (A) (A) (A) (A) (A) (A)
                 (A) (A) (A) (A) (A) (A) (A) (A) (A) (A) (A) (A)
                 (A) (A) (A) (A) (A) (A) (A) (A) (A) (A) (A) (A)
                 (A) (A) (A) (A) (A) (A) (A) (A) (A) (A) (A) (A)
                 (A) (A) (A) (A) (A) (A) (A) (A) (A) (A) (A) (A)
                 (A) (A) (A) (A) (A) (A) (A) (A) (A) (A) (A) (A)
                 (A) (A) (A) (A) (A) (A) (A) (A) (A) (A) (A) (A)
                 (A) (A) (A) (A) (A) (A) (A) (A) (A) (A) (A) (A)
                 (A) (A) (A) (A) (A) (A) (A) (A) (A) (A) (A) (A)
                 (A) (A) (A) (A) (A) (A) (A) (A) (A) (A) (A) (A)
                 (A) (A) (A) (A) (A) (A) (A) (A) (A) (A) (A) (A)
                 (A) (A) (A) (A) (A) (A) (A) (A) (A) (A) (A) (A)
                 (A) (A) (A) (A) (A) (A) (A) (A) (A) (A) (A) (A)
                 (A) (A) (A) (A) (A) (A) (A) (A) (A) (A) (A) (A)
                 (A) (A) (A) (A) (A) (A) (A) (A) (A) (A) (A) (A)
                 (A) (A) (A) (A) (A) (A) (A) (A) (A) (A) (A) (A)
                 (A) (A) (A) (A) (A) (A) (A) (A) (A) (A) (A) (A)
                 (A) (A) (A) (A) (A) (A) (A) (A) (A) (A) (A) (A)
                 (A) (A) (A) (A) (A) (A) (A) (A) (A) (A) (A) (A)
                 (A) (A) (A) (A) (A) (A) (A) (A) (A) (A) (A) (A)
                 (A) (A) (A) (A) (A) (A) (A) (A) (A) (A) (A) (A)
                 (A) (A) (A) (A) (A) (A) (A) (A) (A) (A) (A) (A)
                 (A) (A) (A) (A) (A) (A) (A) (A) (A) (A) (A) (A)
                 (A) (A) (A) (A) (A) (A) (A) (A) (A) (A) (A) (A)
                 (A) (A) (A) (A) (A) (A) (A) (A) (A) (A) (A) (A)
                 (A) (A) (A) (A) (A) (A) (A) (A) (A) (A) (A) (A)
                 (A) (A) (A) (A) (A) (A) (A) (A) (A) (A) (A) (A)
                 (A) (A) (A) (A) (A) (A) (A) (A) (A) (A) (A) (A)
                 (A) (A) (A) (A) (A) (A) (A) (A) (A) (A) (A) (A)
                 (A) (A) (A) (A) (A) (A) (A) (A) (A) (A) (A) (A)
                 (A) (A) (A) (A) (A) (A) (A) (A) (A) (A) (A) (A)
                 (A) (A) (A) (A) (A) (A) (A) (A) (A) (A) (A) (A)
                 (A) (A) (A) (A) (A)
 The electronic state is 1-A.
 Alpha  occ. eigenvalues --  -19.24563 -19.20993 -19.20952 -19.20538 -19.20488
 Alpha  occ. eigenvalues --  -19.20454 -19.20414 -19.20370 -19.20348 -19.20326
 Alpha  occ. eigenvalues --  -19.20279 -19.20149 -19.19861 -19.19810 -19.19803
 Alpha  occ. eigenvalues --  -19.19741 -19.19616 -19.19587 -19.19140 -19.19139
 Alpha  occ. eigenvalues --  -19.19080 -14.42771 -14.42753 -14.42714 -14.42368
 Alpha  occ. eigenvalues --  -14.42345 -14.42245 -14.41705 -14.41660 -14.41574
 Alpha  occ. eigenvalues --  -10.28719 -10.28718 -10.28692 -10.28473 -10.28416
 Alpha  occ. eigenvalues --  -10.28416 -10.28360 -10.28358 -10.28323 -10.28225
 Alpha  occ. eigenvalues --  -10.28216 -10.28193 -10.28144 -10.28120 -10.28086
 Alpha  occ. eigenvalues --  -10.27780 -10.27772 -10.27629 -10.27627 -10.27563
 Alpha  occ. eigenvalues --  -10.27466 -10.27324 -10.27282 -10.27255 -10.27231
 Alpha  occ. eigenvalues --  -10.27201 -10.27113  -1.11454  -1.08203  -1.07121
 Alpha  occ. eigenvalues --   -1.07064  -1.06988  -1.06330  -1.06142  -1.06104
 Alpha  occ. eigenvalues --   -1.05754  -1.05677  -1.05393  -1.05287  -1.05225
 Alpha  occ. eigenvalues --   -1.04592  -1.04150  -1.03846  -1.03812  -1.03794
 Alpha  occ. eigenvalues --   -1.03294  -1.03249  -1.03212  -1.00842  -1.00805
 Alpha  occ. eigenvalues --   -1.00763  -1.00396  -1.00370  -1.00276  -0.99738
 Alpha  occ. eigenvalues --   -0.99688  -0.99596  -0.79008  -0.78985  -0.78979
 Alpha  occ. eigenvalues --   -0.78870  -0.78818  -0.78770  -0.78598  -0.78549
 Alpha  occ. eigenvalues --   -0.78479  -0.78354  -0.78330  -0.78223  -0.77896
 Alpha  occ. eigenvalues --   -0.77841  -0.77748  -0.77705  -0.77670  -0.77573
 Alpha  occ. eigenvalues --   -0.67705  -0.67668  -0.67630  -0.67260  -0.67230
 Alpha  occ. eigenvalues --   -0.67132  -0.66590  -0.66544  -0.66450  -0.61624
 Alpha  occ. eigenvalues --   -0.61501  -0.60455  -0.60306  -0.60095  -0.59518
 Alpha  occ. eigenvalues --   -0.59470  -0.59168  -0.59114  -0.59014  -0.58879
 Alpha  occ. eigenvalues --   -0.58656  -0.58349  -0.58206  -0.58070  -0.57832
 Alpha  occ. eigenvalues --   -0.57455  -0.57250  -0.57164  -0.57129  -0.56863
 Alpha  occ. eigenvalues --   -0.56835  -0.55070  -0.55048  -0.55032  -0.55007
 Alpha  occ. eigenvalues --   -0.54980  -0.54951  -0.54691  -0.54597  -0.54576
 Alpha  occ. eigenvalues --   -0.54560  -0.54552  -0.54543  -0.54496  -0.54460
 Alpha  occ. eigenvalues --   -0.54378  -0.54058  -0.54033  -0.54027  -0.53915
 Alpha  occ. eigenvalues --   -0.53907  -0.53886  -0.53845  -0.53790  -0.53748
 Alpha  occ. eigenvalues --   -0.53495  -0.53405  -0.53303  -0.49169  -0.48858
 Alpha  occ. eigenvalues --   -0.48530  -0.48340  -0.47935  -0.47892  -0.47868
 Alpha  occ. eigenvalues --   -0.47811  -0.47728  -0.47722  -0.47687  -0.47457
 Alpha  occ. eigenvalues --   -0.47433  -0.47380  -0.47327  -0.47285  -0.47251
 Alpha  occ. eigenvalues --   -0.47201  -0.47126  -0.46785  -0.46738  -0.46641
 Alpha  occ. eigenvalues --   -0.46627  -0.46588  -0.46493  -0.46283  -0.45377
 Alpha  occ. eigenvalues --   -0.45340  -0.45301  -0.45165  -0.44933  -0.44892
 Alpha  occ. eigenvalues --   -0.44806  -0.44765  -0.44712  -0.44695  -0.44658
 Alpha  occ. eigenvalues --   -0.44619  -0.44575  -0.44537  -0.44477  -0.44254
 Alpha  occ. eigenvalues --   -0.44248  -0.44210  -0.44195  -0.44174  -0.44161
 Alpha  occ. eigenvalues --   -0.44149  -0.44094  -0.44081  -0.44036  -0.43750
 Alpha  occ. eigenvalues --   -0.43535  -0.43521  -0.43493  -0.43477  -0.43394
 Alpha  occ. eigenvalues --   -0.43383  -0.43199  -0.43166  -0.43037  -0.42906
 Alpha  occ. eigenvalues --   -0.42265  -0.41466  -0.41181  -0.40254  -0.37672
 Alpha  occ. eigenvalues --   -0.37640  -0.37443  -0.37268  -0.37223  -0.37174
 Alpha  occ. eigenvalues --   -0.37102  -0.36994  -0.36759  -0.36606  -0.36501
 Alpha  occ. eigenvalues --   -0.36429  -0.36325  -0.36158  -0.36082  -0.35892
 Alpha  occ. eigenvalues --   -0.35750  -0.35556  -0.35410  -0.35340  -0.31602
 Alpha  occ. eigenvalues --   -0.31564  -0.31525  -0.31166  -0.31153  -0.31027
 Alpha  occ. eigenvalues --   -0.30522  -0.30474  -0.30394
 Alpha virt. eigenvalues --   -0.08766  -0.07578  -0.07531  -0.07024  -0.06093
 Alpha virt. eigenvalues --   -0.06016  -0.05679  -0.05654  -0.05620  -0.04884
 Alpha virt. eigenvalues --   -0.04627  -0.04538  -0.04510  -0.04179  -0.03890
 Alpha virt. eigenvalues --   -0.03883  -0.03711  -0.03363  -0.03314  -0.03214
 Alpha virt. eigenvalues --   -0.03089  -0.02980  -0.02950  -0.02652  -0.02602
 Alpha virt. eigenvalues --   -0.02186  -0.02130  -0.02052  -0.01811  -0.01717
 Alpha virt. eigenvalues --   -0.01644  -0.01484  -0.01439  -0.01396  -0.01351
 Alpha virt. eigenvalues --   -0.01282  -0.00960  -0.00861  -0.00811  -0.00564
 Alpha virt. eigenvalues --   -0.00470  -0.00376  -0.00274   0.00021   0.00105
 Alpha virt. eigenvalues --    0.00150   0.00340   0.00376   0.00452   0.00574
 Alpha virt. eigenvalues --    0.00605   0.00786   0.00843   0.00939   0.00968
 Alpha virt. eigenvalues --    0.01073   0.01322   0.01443   0.01516   0.01681
 Alpha virt. eigenvalues --    0.01846   0.01951   0.02148   0.02295   0.02491
 Alpha virt. eigenvalues --    0.02613   0.02795   0.03056   0.03381   0.03649
 Alpha virt. eigenvalues --    0.03915   0.04051   0.04111   0.04191   0.04305
 Alpha virt. eigenvalues --    0.04523   0.04583   0.04627   0.04648   0.05044
 Alpha virt. eigenvalues --    0.05180   0.05332   0.05341   0.05475   0.05503
 Alpha virt. eigenvalues --    0.05549   0.05854   0.05966   0.06040   0.06146
 Alpha virt. eigenvalues --    0.06225   0.06315   0.06570   0.06683   0.06755
 Alpha virt. eigenvalues --    0.06875   0.06965   0.07028   0.07224   0.07491
 Alpha virt. eigenvalues --    0.07556   0.07705   0.07835   0.07912   0.08033
 Alpha virt. eigenvalues --    0.08077   0.08172   0.08191   0.08299   0.08394
 Alpha virt. eigenvalues --    0.08507   0.08542   0.08719   0.08798   0.08913
 Alpha virt. eigenvalues --    0.09071   0.09108   0.09181   0.09257   0.09353
 Alpha virt. eigenvalues --    0.09392   0.09571   0.09661   0.09715   0.09786
 Alpha virt. eigenvalues --    0.09927   0.10013   0.10159   0.10250   0.10425
 Alpha virt. eigenvalues --    0.10447   0.10486   0.10707   0.10851   0.10977
 Alpha virt. eigenvalues --    0.11042   0.11239   0.11459   0.11718   0.11791
 Alpha virt. eigenvalues --    0.11888   0.11983   0.12229   0.12286   0.12735
 Alpha virt. eigenvalues --    0.12849   0.13037   0.13306   0.13407   0.13602
 Alpha virt. eigenvalues --    0.13627   0.13815   0.13887   0.14065   0.14209
 Alpha virt. eigenvalues --    0.14313   0.14357   0.14443   0.14484   0.14603
 Alpha virt. eigenvalues --    0.14699   0.14789   0.14881   0.14959   0.15124
 Alpha virt. eigenvalues --    0.15220   0.15533   0.15633   0.15858   0.15918
 Alpha virt. eigenvalues --    0.16126   0.16372   0.16440   0.16608   0.16784
 Alpha virt. eigenvalues --    0.16852   0.16939   0.17061   0.17114   0.17220
 Alpha virt. eigenvalues --    0.17261   0.17312   0.17492   0.17523   0.17682
 Alpha virt. eigenvalues --    0.17777   0.17817   0.17845   0.17926   0.17985
 Alpha virt. eigenvalues --    0.18097   0.18213   0.18279   0.18334   0.18412
 Alpha virt. eigenvalues --    0.18506   0.18561   0.18575   0.18739   0.18775
 Alpha virt. eigenvalues --    0.18858   0.18989   0.19059   0.19124   0.19169
 Alpha virt. eigenvalues --    0.19231   0.19414   0.19449   0.19551   0.19619
 Alpha virt. eigenvalues --    0.19689   0.19724   0.19814   0.19834   0.19992
 Alpha virt. eigenvalues --    0.20117   0.20196   0.20361   0.20493   0.20526
 Alpha virt. eigenvalues --    0.20754   0.20809   0.20948   0.20987   0.21041
 Alpha virt. eigenvalues --    0.21252   0.21296   0.21324   0.21427   0.21526
 Alpha virt. eigenvalues --    0.21568   0.21585   0.21688   0.21776   0.21929
 Alpha virt. eigenvalues --    0.22029   0.22169   0.22289   0.22338   0.22391
 Alpha virt. eigenvalues --    0.22497   0.22537   0.22629   0.22729   0.22814
 Alpha virt. eigenvalues --    0.22833   0.22977   0.23055   0.23240   0.23365
 Alpha virt. eigenvalues --    0.23422   0.23483   0.23625   0.23672   0.23776
 Alpha virt. eigenvalues --    0.23850   0.23942   0.24093   0.24267   0.24346
 Alpha virt. eigenvalues --    0.24469   0.24560   0.24704   0.24878   0.24902
 Alpha virt. eigenvalues --    0.24994   0.25050   0.25152   0.25360   0.25465
 Alpha virt. eigenvalues --    0.25644   0.25740   0.25773   0.25911   0.25962
 Alpha virt. eigenvalues --    0.26086   0.26148   0.26278   0.26420   0.26532
 Alpha virt. eigenvalues --    0.26683   0.26832   0.26982   0.27084   0.27144
 Alpha virt. eigenvalues --    0.27266   0.27427   0.27554   0.27635   0.27855
 Alpha virt. eigenvalues --    0.27914   0.28139   0.28194   0.28328   0.28598
 Alpha virt. eigenvalues --    0.28740   0.28877   0.28966   0.29141   0.29208
 Alpha virt. eigenvalues --    0.29457   0.29528   0.29683   0.29855   0.30116
 Alpha virt. eigenvalues --    0.30326   0.30662   0.30706   0.30848   0.31163
 Alpha virt. eigenvalues --    0.31398   0.31443   0.31559   0.31771   0.32279
 Alpha virt. eigenvalues --    0.32646   0.32904   0.33150   0.33322   0.33857
 Alpha virt. eigenvalues --    0.34443   0.34634   0.34749   0.35104   0.35147
 Alpha virt. eigenvalues --    0.35348   0.35690   0.35914   0.36626   0.36920
 Alpha virt. eigenvalues --    0.36954   0.37138   0.37293   0.37519   0.37733
 Alpha virt. eigenvalues --    0.37848   0.38017   0.38465   0.38634   0.38997
 Alpha virt. eigenvalues --    0.39212   0.39347   0.39802   0.39925   0.40341
 Alpha virt. eigenvalues --    0.40608   0.40713   0.40984   0.41561   0.41736
 Alpha virt. eigenvalues --    0.44215   0.44349   0.45144   0.45627   0.46193
 Alpha virt. eigenvalues --    0.46254   0.46661   0.46741   0.47564   0.48745
 Alpha virt. eigenvalues --    0.49677   0.50096   0.50184   0.50428   0.51016
 Alpha virt. eigenvalues --    0.51506   0.51974   0.52296   0.52686   0.53303
 Alpha virt. eigenvalues --    0.53378   0.54913   0.55525   0.55898   0.57625
 Alpha virt. eigenvalues --    0.57998   0.58353   0.58881   0.59565   0.59886
 Alpha virt. eigenvalues --    0.59934   0.60008   0.60137   0.60383   0.60469
 Alpha virt. eigenvalues --    0.60792   0.60974   0.61061   0.61165   0.61260
 Alpha virt. eigenvalues --    0.61308   0.61494   0.61543   0.61671   0.61784
 Alpha virt. eigenvalues --    0.61879   0.62002   0.62152   0.62628   0.62710
 Alpha virt. eigenvalues --    0.62982   0.63118   0.63280   0.63447   0.63572
 Alpha virt. eigenvalues --    0.63666   0.63935   0.63986   0.64461   0.64525
 Alpha virt. eigenvalues --    0.64834   0.64842   0.65268   0.65459   0.65596
 Alpha virt. eigenvalues --    0.65705   0.66132   0.66592   0.66933   0.67033
 Alpha virt. eigenvalues --    0.67581   0.67849   0.68075   0.68296   0.69001
 Alpha virt. eigenvalues --    0.69204   0.69336   0.69621   0.70049   0.70199
 Alpha virt. eigenvalues --    0.70602   0.70894   0.70940   0.72285   0.72413
 Alpha virt. eigenvalues --    0.72635   0.72955   0.73027   0.73169   0.73385
 Alpha virt. eigenvalues --    0.73534   0.73638   0.73698   0.74113   0.74306
 Alpha virt. eigenvalues --    0.74403   0.75244   0.75470   0.76910   0.77128
 Alpha virt. eigenvalues --    0.77546   0.77780   0.77864   0.78358   0.78443
 Alpha virt. eigenvalues --    0.78716   0.79306   0.79556   0.80045   0.80400
 Alpha virt. eigenvalues --    0.87016   0.87223   0.87417   0.88044   0.88121
 Alpha virt. eigenvalues --    0.88274   0.88564   0.88643   0.88896   0.89031
 Alpha virt. eigenvalues --    0.89297   0.89593   0.89663   0.89774   0.89874
 Alpha virt. eigenvalues --    0.89986   0.90041   0.90215   0.90437   0.90601
 Alpha virt. eigenvalues --    0.90747   0.91237   0.91352   0.91546   0.91639
 Alpha virt. eigenvalues --    0.92289   0.92526   0.92885   0.93005   0.93288
 Alpha virt. eigenvalues --    0.93468   0.93549   0.93667   0.93940   0.94218
 Alpha virt. eigenvalues --    0.94341   0.94455   0.94668   0.94814   0.94843
 Alpha virt. eigenvalues --    0.95016   0.95071   0.95165   0.95252   0.95392
 Alpha virt. eigenvalues --    0.95743   0.95779   0.95854   0.96264   0.96452
 Alpha virt. eigenvalues --    0.96757   0.97344   0.97736   0.97829   0.98519
 Alpha virt. eigenvalues --    0.98626   0.98772   0.98870   0.99045   0.99212
 Alpha virt. eigenvalues --    0.99361   0.99457   0.99548   0.99667   0.99791
 Alpha virt. eigenvalues --    0.99886   1.00059   1.00128   1.00262   1.00385
 Alpha virt. eigenvalues --    1.00634   1.00811   1.01063   1.02478   1.02541
 Alpha virt. eigenvalues --    1.04165   1.04597   1.04768   1.05252   1.05371
 Alpha virt. eigenvalues --    1.05422   1.05579   1.05788   1.05829   1.06155
 Alpha virt. eigenvalues --    1.06511   1.06660   1.06878   1.07202   1.07716
 Alpha virt. eigenvalues --    1.08011   1.08066   1.08597   1.08819   1.08961
 Alpha virt. eigenvalues --    1.09133   1.09549   1.09686   1.09972   1.10127
 Alpha virt. eigenvalues --    1.10286   1.10542   1.10725   1.11055   1.11270
 Alpha virt. eigenvalues --    1.11393   1.11635   1.11727   1.12091   1.12138
 Alpha virt. eigenvalues --    1.12469   1.12630   1.12737   1.12871   1.13195
 Alpha virt. eigenvalues --    1.13241   1.13718   1.13790   1.13858   1.14157
 Alpha virt. eigenvalues --    1.14525   1.14829   1.14979   1.15357   1.15775
 Alpha virt. eigenvalues --    1.15914   1.16148   1.16294   1.16630   1.16972
 Alpha virt. eigenvalues --    1.17152   1.17515   1.17613   1.17907   1.18232
 Alpha virt. eigenvalues --    1.18484   1.18797   1.18950   1.19291   1.19566
 Alpha virt. eigenvalues --    1.19969   1.20137   1.20350   1.20885   1.21013
 Alpha virt. eigenvalues --    1.21282   1.21783   1.22051   1.22231   1.22507
 Alpha virt. eigenvalues --    1.22808   1.23019   1.23357   1.23559   1.23974
 Alpha virt. eigenvalues --    1.24173   1.24548   1.24784   1.24883   1.25027
 Alpha virt. eigenvalues --    1.25429   1.25734   1.26094   1.26171   1.26459
 Alpha virt. eigenvalues --    1.26793   1.26872   1.27278   1.27502   1.27874
 Alpha virt. eigenvalues --    1.28168   1.28223   1.28413   1.28529   1.28840
 Alpha virt. eigenvalues --    1.28909   1.28957   1.29276   1.29486   1.29912
 Alpha virt. eigenvalues --    1.30255   1.30390   1.30579   1.30756   1.30844
 Alpha virt. eigenvalues --    1.31119   1.31456   1.31637   1.31759   1.32052
 Alpha virt. eigenvalues --    1.32135   1.32996   1.33051   1.33628   1.33740
 Alpha virt. eigenvalues --    1.34010   1.34075   1.34531   1.34654   1.34786
 Alpha virt. eigenvalues --    1.35039   1.35320   1.35626   1.35876   1.36057
 Alpha virt. eigenvalues --    1.36290   1.36537   1.36613   1.36678   1.36838
 Alpha virt. eigenvalues --    1.36910   1.36941   1.37083   1.37209   1.37265
 Alpha virt. eigenvalues --    1.37355   1.37426   1.37582   1.37756   1.37830
 Alpha virt. eigenvalues --    1.37965   1.38006   1.38095   1.38290   1.38378
 Alpha virt. eigenvalues --    1.38649   1.38912   1.39114   1.39270   1.39784
 Alpha virt. eigenvalues --    1.40154   1.40499   1.40643   1.40836   1.41382
 Alpha virt. eigenvalues --    1.41473   1.41732   1.41851   1.42370   1.42447
 Alpha virt. eigenvalues --    1.42720   1.42982   1.43292   1.43501   1.43878
 Alpha virt. eigenvalues --    1.44193   1.44427   1.44732   1.45079   1.45454
 Alpha virt. eigenvalues --    1.45879   1.46145   1.46487   1.46763   1.47354
 Alpha virt. eigenvalues --    1.47994   1.48436   1.49036   1.49915   1.52704
 Alpha virt. eigenvalues --    1.53071   1.54261   1.54865   1.55230   1.55605
 Alpha virt. eigenvalues --    1.56041   1.57363   1.57977   1.58930   1.59302
 Alpha virt. eigenvalues --    1.59736   1.59923   1.63475   1.63840   1.64367
 Alpha virt. eigenvalues --    1.64815   1.66041   1.67213   1.67271   1.67324
 Alpha virt. eigenvalues --    1.67447   1.67585   1.67663   1.67701   1.67783
 Alpha virt. eigenvalues --    1.67826   1.68171   1.68331   1.68375   1.68450
 Alpha virt. eigenvalues --    1.68790   1.69212   1.69272   1.69825   1.69986
 Alpha virt. eigenvalues --    1.70042   1.70348   1.70614   1.70922   1.71295
 Alpha virt. eigenvalues --    1.71652   1.71784   1.72111   1.72251   1.72633
 Alpha virt. eigenvalues --    1.72966   1.73009   1.73417   1.73736   1.74086
 Alpha virt. eigenvalues --    1.74916   1.75178   1.75510   1.75626   1.75931
 Alpha virt. eigenvalues --    1.76284   1.76538   1.77090   1.77607   1.78043
 Alpha virt. eigenvalues --    1.79001   1.79903   1.80025   1.80440   1.81119
 Alpha virt. eigenvalues --    1.82432   1.82831   1.83101   1.83245   1.83387
 Alpha virt. eigenvalues --    1.83483   1.83624   1.83761   1.83790   1.83828
 Alpha virt. eigenvalues --    1.83952   1.84014   1.84056   1.84166   1.84206
 Alpha virt. eigenvalues --    1.84277   1.84357   1.84380   1.84444   1.84635
 Alpha virt. eigenvalues --    1.85380   1.85773   1.86026   1.86825   1.87242
 Alpha virt. eigenvalues --    1.87833   1.88326   1.89293   1.89612   1.90223
 Alpha virt. eigenvalues --    1.90331   1.90554   1.90726   1.90868   1.90947
 Alpha virt. eigenvalues --    1.91018   1.91089   1.91303   1.91568   1.91639
 Alpha virt. eigenvalues --    1.91893   1.91998   1.92785   1.93200   1.93772
 Alpha virt. eigenvalues --    1.94037   1.94443   1.94566   1.94689   1.94876
 Alpha virt. eigenvalues --    1.95169   1.95333   1.95567   1.95617   1.95777
 Alpha virt. eigenvalues --    1.95845   1.96104   1.96411   1.96556   1.96573
 Alpha virt. eigenvalues --    1.96691   1.96765   1.96846   1.97403   1.97652
 Alpha virt. eigenvalues --    1.97730   1.98328   1.98719   2.00173   2.00304
 Alpha virt. eigenvalues --    2.00738   2.01112   2.01759   2.02256   2.02794
 Alpha virt. eigenvalues --    2.03498   2.05026   2.06266   2.06706   2.08391
 Alpha virt. eigenvalues --    2.08856   2.09140   2.09772   2.09915   2.10084
 Alpha virt. eigenvalues --    2.10215   2.10431   2.10549   2.10780   2.10999
 Alpha virt. eigenvalues --    2.11138   2.11390   2.11582   2.11711   2.12160
 Alpha virt. eigenvalues --    2.12332   2.12837   2.14722   2.14809   2.14958
 Alpha virt. eigenvalues --    2.15245   2.15464   2.15503   2.15636   2.15672
 Alpha virt. eigenvalues --    2.15883   2.17056   2.17731   2.17839   2.17960
 Alpha virt. eigenvalues --    2.18191   2.18265   2.18403   2.18489   2.18586
 Alpha virt. eigenvalues --    2.18785   2.19673   2.19724   2.19835   2.20072
 Alpha virt. eigenvalues --    2.20160   2.20277   2.20440   2.20482   2.20520
 Alpha virt. eigenvalues --    2.20634   2.20697   2.20771   2.20785   2.20865
 Alpha virt. eigenvalues --    2.20872   2.20934   2.20978   2.21009   2.21032
 Alpha virt. eigenvalues --    2.21058   2.21168   2.21278   2.21308   2.21352
 Alpha virt. eigenvalues --    2.21620   2.21693   2.21719   2.38529   2.40321
 Alpha virt. eigenvalues --    2.41305   2.42020   2.42697   2.43088   2.44397
 Alpha virt. eigenvalues --    2.45951   2.47732   2.47925   2.48214   2.48576
 Alpha virt. eigenvalues --    2.48806   2.49040   2.49183   2.49245   2.49504
 Alpha virt. eigenvalues --    2.49542   2.49750   2.50014   2.50156   2.50375
 Alpha virt. eigenvalues --    2.51095   2.51141   2.51219   2.51254   2.51461
 Alpha virt. eigenvalues --    2.51504   2.51571   2.51660   2.51682   2.51717
 Alpha virt. eigenvalues --    2.51751   2.51789   2.51870   2.52075   2.52110
 Alpha virt. eigenvalues --    2.52207   2.52265   2.52309   2.52333   2.52539
 Alpha virt. eigenvalues --    2.53230   2.54520   2.55392   2.55852   2.56629
 Alpha virt. eigenvalues --    2.60054   2.64970   2.65440   2.65638   2.66253
 Alpha virt. eigenvalues --    2.66638   2.66991   2.67157   2.67456   2.67713
 Alpha virt. eigenvalues --    2.68075   2.68557   2.68784   2.68903   2.69267
 Alpha virt. eigenvalues --    2.69413   2.70300   2.70669   2.71059   2.71115
 Alpha virt. eigenvalues --    2.71211   2.71350   2.71467   2.71783   2.71876
 Alpha virt. eigenvalues --    2.72020   2.72042   2.72167   2.72288   2.72327
 Alpha virt. eigenvalues --    2.72436   2.72536   2.72631   2.72760   2.72877
 Alpha virt. eigenvalues --    2.72986   2.73063   2.73225   2.73272   2.73443
 Alpha virt. eigenvalues --    2.74088   4.12162   4.13725   4.13952   4.14360
 Alpha virt. eigenvalues --    4.14628   4.14880   4.15189   4.15425   4.15586
 Alpha virt. eigenvalues --    4.16145   4.20584   4.21154   4.22380   4.23980
 Alpha virt. eigenvalues --    4.24918   4.26566   4.26771   4.26945   4.27250
 Alpha virt. eigenvalues --    4.27259   4.27386   4.27499   4.27567   4.27764
 Alpha virt. eigenvalues --    4.27785   4.28196   4.28240   4.28486   4.28717
 Alpha virt. eigenvalues --    4.28954   4.29205   4.31028   4.31331   4.33091
 Alpha virt. eigenvalues --    4.35345   4.37234   4.37779   4.38108   4.39074
 Alpha virt. eigenvalues --    4.39764   4.39908   4.40375   4.40808   4.42106
 Alpha virt. eigenvalues --    4.42880   4.43339   4.46023   4.47707   4.49545
 Alpha virt. eigenvalues --    4.50326   4.52312   4.53184   4.55531   4.57482
 Alpha virt. eigenvalues --    4.59072   4.68330   4.81187
          Condensed to atoms (all electrons):
 Mulliken atomic charges:
              1
     1  H    0.618544
     2  H    0.617265
     3  H    0.690510
     4  H    0.654876
     5  H    0.653003
     6  H    0.661195
     7  H    0.658284
     8  H    0.693510
     9  H    0.658458
    10  H    0.623969
    11  H    0.620560
    12  H    0.630983
    13  H    0.628836
    14  H    0.624750
    15  H    0.613587
    16  H    0.620023
    17  H    0.636758
    18  H    0.614796
    19  H    0.618727
    20  H    0.609249
    21  H    0.625264
    22  H    0.711784
    23  H    0.705312
    24  H    0.633282
    25  H    0.619276
    26  H    0.617416
    27  H    0.653174
    28  H    0.647397
    29  H    0.620981
    30  H    0.673243
    31  H    0.661052
    32  H    0.648794
    33  H    0.646867
    34  H    0.646918
    35  H    0.208229
    36  H    0.228868
    37  H    0.208862
    38  H    0.206099
    39  H    0.212471
    40  H    0.238138
    41  H    0.209792
    42  H    0.210704
    43  H    0.207437
    44  H    0.209986
    45  H    0.211334
    46  H    0.207619
    47  H    0.236252
    48  H    0.206919
    49  H    0.212124
    50  H    0.208749
    51  H    0.227550
    52  H    0.209109
    53  H    0.217451
    54  H    0.209658
    55  H    0.208485
    56  H    0.208778
    57  H    0.218012
    58  H    0.205917
    59  H    0.229841
    60  H    0.206811
    61  H    0.228345
    62  H    0.207002
    63  H    0.216810
    64  H    0.223942
    65  H    0.206778
    66  H    0.207093
    67  H    0.219568
    68  H    0.206645
    69  H    0.223854
    70  H    0.212333
    71  H    0.213495
    72  H    0.209911
    73  H    0.207413
    74  H    0.209080
    75  H    0.218382
    76  H    0.204443
    77  H    0.233486
    78  H    0.207564
    79  H    0.225200
    80  H    0.206437
    81  H    0.216689
    82  H    0.222947
    83  H    0.206410
    84  H    0.208993
    85  H    0.217549
    86  H    0.206400
    87  H    0.224624
    88  H    0.214850
    89  H    0.206549
    90  H    0.215104
    91  H    0.223396
    92  H    0.206401
    93  H    0.209749
    94  H    0.218234
    95  H    0.206566
    96  H    0.223823
    97  H    0.212625
    98  H    0.208814
    99  H    0.224318
   100  H    0.209140
   101  H    0.208840
   102  H    0.209065
   103  H    0.212390
   104  H    0.234489
   105  H    0.206419
   106  H    0.213992
   107  H    0.204506
   108  H    0.208819
   109  H    0.218452
   110  H    0.208339
   111  H    0.216954
   112  H    0.209551
   113  H    0.227559
   114  H    0.207721
   115  H    0.226939
   116  H    0.634990
   117  H    0.631986
   118  H    0.644619
   119  H    0.630919
   120  H    0.647712
   121  H    0.644919
   122  H    0.636394
   123  H    0.626697
   124  H    0.640633
   125  C   -0.477504
   126  C   -0.486175
   127  C   -0.471863
   128  C   -0.486342
   129  C   -0.459742
   130  C   -0.455321
   131  C   -0.461994
   132  C   -0.499591
   133  C   -0.474086
   134  C   -0.469793
   135  C   -0.444026
   136  C   -0.462357
   137  C   -0.452013
   138  C   -0.507518
   139  C   -0.458271
   140  C   -0.465342
   141  C   -0.464378
   142  C   -0.459225
   143  C   -0.466932
   144  C   -0.461216
   145  C   -0.466870
   146  C   -0.460108
   147  C   -0.488577
   148  C   -0.447770
   149  C   -0.457737
   150  C   -0.506050
   151  C   -0.450214
   152  N   -0.561610
   153  N   -0.532497
   154  N   -0.538633
   155  N   -0.537099
   156  N   -0.528046
   157  N   -0.551200
   158  N   -0.560614
   159  N   -0.527534
   160  N   -0.540955
   161  O   -1.180331
   162  O   -1.350521
   163  O   -1.294369
   164  O   -1.368480
   165  O   -1.366807
   166  O   -1.235477
   167  O   -1.203093
   168  O   -1.205041
   169  O   -1.177395
   170  O   -1.268607
   171  O   -1.236406
   172  O   -1.162599
   173  O   -1.242418
   174  O   -1.347715
   175  O   -1.201362
   176  O   -1.245147
   177  O   -1.298994
   178  O   -1.278764
   179  O   -1.239752
   180  O   -1.373965
   181  O   -1.131262
 Sum of Mulliken atomic charges =   1.00000
 Mulliken charges with hydrogens summed into heavy atoms:
              1
   125  C    0.179204
   126  C    0.141759
   127  C    0.157077
   128  C    0.168953
   129  C    0.185666
   130  C    0.180273
   131  C    0.170713
   132  C    0.165407
   133  C    0.173668
   134  C    0.163646
   135  C    0.198806
   136  C    0.168462
   137  C    0.179893
   138  C    0.158732
   139  C    0.187802
   140  C    0.167610
   141  C    0.181496
   142  C    0.185825
   143  C    0.167452
   144  C    0.181798
   145  C    0.175401
   146  C    0.170186
   147  C    0.166322
   148  C    0.184006
   149  C    0.177107
   150  C    0.156168
   151  C    0.195744
   152  N   -0.561610
   153  N   -0.532497
   154  N   -0.538633
   155  N   -0.537099
   156  N   -0.528046
   157  N   -0.551200
   158  N   -0.560614
   159  N   -0.527534
   160  N   -0.540955
   161  O    0.055478
   162  O   -0.005135
   163  O    0.003253
   164  O   -0.049001
   165  O   -0.014839
   166  O    0.024886
   167  O    0.048449
   168  O    0.048545
   169  O    0.056215
   170  O    0.008785
   171  O    0.010377
   172  O    0.065378
   173  O    0.009544
   174  O    0.069382
   175  O    0.051195
   176  O    0.003188
   177  O    0.001893
   178  O    0.013552
   179  O    0.016220
   180  O   -0.039669
   181  O    0.811317
 Sum of Mulliken charges with hydrogens summed into heavy atoms =   1.00000
 Electronic spatial extent (au):  <R**2>=          64155.0469
 Charge=              1.0000 electrons
 Dipole moment (field-independent basis, Debye):
    X=              0.0619    Y=             -0.0692    Z=              9.4487  Tot=              9.4492
 Quadrupole moment (field-independent basis, Debye-Ang):
   XX=           -247.5353   YY=           -249.4919   ZZ=           -324.1287
   XY=             -1.1317   XZ=             -0.6922   YZ=              1.3225
 Traceless Quadrupole moment (field-independent basis, Debye-Ang):
   XX=             26.1833   YY=             24.2268   ZZ=            -50.4101
   XY=             -1.1317   XZ=             -0.6922   YZ=              1.3225
 Octapole moment (field-independent basis, Debye-Ang**2):
  XXX=            -87.5497  YYY=             56.8972  ZZZ=            256.3803  XYY=             73.5632
  XXY=            -33.1647  XXZ=            -59.2782  XZZ=             15.5631  YZZ=             -3.2075
  YYZ=            -62.3418  XYZ=              1.9339
 Hexadecapole moment (field-independent basis, Debye-Ang**3):
 XXXX=         -27148.6914 YYYY=         -26860.6520 ZZZZ=         -20396.8939 XXXY=            -55.0955
 XXXZ=            278.8701 YYYX=              2.7927 YYYZ=            538.5533 ZZZX=            -49.0188
 ZZZY=              6.6762 XXYY=          -8978.1381 XXZZ=          -7667.7315 YYZZ=          -7600.5367
 XXYZ=           -517.6872 YYXZ=           -253.9437 ZZXY=             13.7883
 N-N= 1.116504017127D+04 E-N=-2.971662158589D+04  KE= 3.146070384654D+03
 1\1\GINC-NODE220\SP\RB3LYP\6-31+G(d)\C27H124N9O21(1+)\P253081\27-Jun-2
 014\0\\# sp b3lyp/6-31+g*\\something\\1,1\H,0,-2.51186,-2.08757,-0.559
 136\H,0,-2.21668,-2.09555,-2.09314\H,0,0.0718957,0.115751,-1.66457\H,0
 ,1.00888,0.450996,-2.87166\H,0,-0.23635,-3.25664,0.995984\H,0,-0.26639
 3,2.46595,1.89499\H,0,-0.675385,3.01436,0.421766\H,0,-0.90227,-1.29543
 ,0.569857\H,0,-1.89001,-1.77252,1.69087\H,0,0.659182,3.53667,-1.18519\
 H,0,2.48802,2.29116,-1.73518\H,0,2.56475,2.85591,-0.267752\H,0,0.70937
 1,-0.938094,3.48956\H,0,0.444928,0.611504,3.64546\H,0,-1.18744,1.39174
 ,-2.74567\H,0,-1.41217,2.73039,-1.97907\H,0,2.6209,-2.18037,-1.6082\H,
 0,1.45662,-2.83515,2.1909\H,0,-3.08342,0.414244,1.94782\H,0,-2.49847,1
 .72626,1.33321\H,0,3.04807,-0.00579643,-2.40784\H,0,-0.291312,0.88397,
 0.44696\H,0,0.98694,-0.0728369,0.358727\H,0,1.17853,-3.57202,-0.670973
 \H,0,0.657606,-3.12157,-2.09572\H,0,1.76187,2.35644,2.59947\H,0,2.9957
 4,1.27472,1.20462\H,0,-0.384475,-1.45535,-3.03826\H,0,-1.50242,-0.5613
 49,3.40671\H,0,2.99453,-0.817311,0.0154971\H,0,2.4976,-1.0424,1.53973\
 H,0,-2.91398,1.2027,-1.67656\H,0,-3.31451,-0.415964,-1.33453\H,0,-3.49
 515,0.775505,-0.138451\H,0,6.59028,-4.16087,-3.14731\H,0,4.81651,-3.98
 267,-3.27818\H,0,5.87766,-2.62537,-3.71508\H,0,6.21017,-4.77029,-0.672
 943\H,0,5.27391,-3.60558,0.30827\H,0,4.4597,-4.5372,-0.964829\H,0,7.75
 666,-2.79135,-1.29619\H,0,6.96722,-1.34668,-1.98601\H,0,6.70841,-1.764
 61,-0.277998\H,0,5.19376,-4.11501,5.21524\H,0,4.21284,-4.71286,3.84842
 \H,0,5.16287,-3.22172,3.66912\H,0,2.92458,-1.17297,5.67192\H,0,4.39475
 ,-1.93487,6.34998\H,0,4.42784,-1.18965,4.72634\H,0,3.01848,-4.09607,6.
 60685\H,0,1.63756,-3.19141,5.92144\H,0,2.18239,-4.69596,5.14785\H,0,-1
 .98229,-5.85095,2.18214\H,0,-1.57468,-7.58148,2.35192\H,0,-0.644886,-6
 .34515,3.24404\H,0,0.656046,-8.35438,1.32588\H,0,1.64696,-7.1062,0.519
 72\H,0,1.44462,-7.07313,2.28622\H,0,-0.166758,-6.41808,-0.913575\H,0,-
 1.27579,-7.63316,-0.210444\H,0,-1.70909,-5.89932,-0.205592\H,0,-1.7122
 2,-5.37981,-6.16669\H,0,-0.817777,-5.37806,-4.61975\H,0,-2.48663,-4.76
 935,-4.67711\H,0,0.212953,-3.97089,-7.13541\H,0,0.634759,-2.47316,-6.2
 5895\H,0,0.978448,-4.05366,-5.52235\H,0,-2.20802,-3.0854,-7.22403\H,0,
 -2.95233,-2.62382,-5.66699\H,0,-1.62899,-1.64689,-6.33668\H,0,2.47498,
 0.453596,-6.27939\H,0,3.85093,1.09201,-7.22217\H,0,4.10058,-0.224873,-
 6.04246\H,0,5.62653,2.43483,-5.91446\H,0,5.35391,2.62585,-4.15957\H,0,
 5.7602,1.02747,-4.82492\H,0,3.14552,3.54151,-4.48336\H,0,3.28,3.41862,
 -6.26306\H,0,1.93242,2.62525,-5.39883\H,0,-0.329015,7.79003,-3.1115\H,
 0,0.855005,6.46125,-2.94841\H,0,-0.784757,6.11691,-3.54189\H,0,0.06688
 17,8.27672,-0.611664\H,0,-0.150775,6.90981,0.517249\H,0,1.22037,6.9116
 1,-0.613942\H,0,-2.31391,7.78307,-1.47138\H,0,-2.64414,6.11178,-2.0087
 4\H,0,-2.3749,6.44815,-0.285672\H,0,-4.86041,-0.865246,6.81685\H,0,-3.
 24742,-0.246485,6.35995\H,0,-4.67746,0.234091,5.42035\H,0,-3.88162,-3.
 23471,6.5629\H,0,-3.09664,-3.61772,5.00483\H,0,-2.33452,-2.45895,6.116
 04\H,0,-5.95915,-2.54378,5.20343\H,0,-5.71062,-1.33493,3.91189\H,0,-5.
 03834,-2.96942,3.73298\H,0,6.6654,4.83505,2.07519\H,0,5.11005,4.95866,
 1.20437\H,0,5.12358,4.63277,2.95168\H,0,6.18337,1.16786,2.61393\H,0,7.
 32622,2.50097,2.94358\H,0,5.74079,2.44866,3.76343\H,0,5.69367,3.21165,
 -0.350458\H,0,7.30074,2.9804,0.402263\H,0,6.16372,1.6093,0.25125\H,0,2
 .71524,4.11428,5.72398\H,0,1.60145,4.49653,7.06527\H,0,1.76614,2.81596
 ,6.48242\H,0,1.64318,5.67178,4.22883\H,0,-0.0965478,5.52588,3.89585\H,
 0,0.45708,6.16908,5.46765\H,0,-0.594292,2.62502,6.02848\H,0,-0.913593,
 4.2948,6.58329\H,0,-1.384,3.78171,4.93739\H,0,-2.96754,-1.14625,3.7765
 8\H,0,2.45057,-2.50851,3.43509\H,0,0.329071,-4.75438,1.13579\H,0,0.916
 105,2.95976,3.85649\H,0,3.96053,2.50913,1.56318\H,0,-0.830315,-2.74965
 ,-3.90735\H,0,-0.409489,4.75458,-1.20254\H,0,3.15803,1.04215,-3.65445\
 H,0,4.21212,-1.97014,-1.58146\C,0,5.39105,-4.02995,-0.694353\C,0,6.839
 04,-2.17695,-1.2839\C,0,4.55747,-3.81132,4.36537\C,0,3.81291,-1.7635,5
 .42735\C,0,2.516,-3.7941,5.6714\C,0,-1.15713,-6.56059,2.3006\C,0,0.942
 316,-7.28808,1.33728\C,0,-0.880588,-6.60764,-0.106135\C,0,-1.54198,-4.
 82566,-5.22696\C,0,0.265567,-3.49717,-6.13917\C,0,-2.01009,-2.66673,-6
 .22177\C,0,3.54174,0.695973,-6.23893\C,0,5.2089,1.95491,-5.01205\C,0,2
 .9953,2.88029,-5.34236\C,0,-0.20203,6.72624,-2.84404\C,0,0.166582,7.18
 313,-0.494362\C,0,-2.07106,6.71948,-1.3017\C,0,-4.21006,-0.590107,5.96
 794\C,0,-3.2926,-2.81819,5.72671\C,0,-5.24613,-2.1677,4.44889\C,0,5.63
 89,4.4344,2.00629\C,0,6.25996,2.24008,2.82243\C,0,6.23721,2.68544,0.44
 0281\C,0,1.74729,3.86516,6.1713\C,0,0.670307,5.43427,4.67156\C,0,-0.62
 4059,3.67391,5.71759\C,0,5.7445,-3.46239,-3.02207\N,0,-3.99051,-1.7178
 9,5.05764\N,0,3.4023,-3.02172,4.79635\N,0,-0.217516,-6.40646,1.18727\N
 ,0,0.685763,4.06066,5.18098\N,0,5.6284,2.99391,1.73777\N,0,-1.03897,-3
 .47077,-5.47367\N,0,-0.640028,6.44986,-1.47267\N,0,3.78265,1.65538,-5.
 15868\N,0,5.65228,-2.95063,-1.6519\O,0,-2.92875,-1.88484,-1.43487\O,0,
 0.0809015,0.170878,-2.65836\O,0,0.601943,-3.79234,1.02511\O,0,-0.88504
 5,2.34491,1.12761\O,0,-1.46057,-2.07259,0.845578\O,0,-0.304827,3.7632,
 -1.05757\O,0,2.31967,3.0973,-1.19261\O,0,0.117084,-0.27749,3.91941\O,0
 ,-1.89941,2.02552,-2.478\O,0,3.33602,-1.48237,-1.51665\O,0,1.87664,-2.
 10423,2.71613\O,0,-3.30279,1.14957,1.32057\O,0,2.69258,0.837841,-2.787
 46\O,0,0.0488946,0.0348388,0.0520316\O,0,1.46582,-3.40775,-1.60195\O,0
 ,0.919899,2.27718,3.11776\O,0,3.00707,2.2499,1.38394\O,0,-0.717578,-2.
 38752,-2.97505\O,0,-2.38883,-0.812926,3.02325\O,0,2.64102,-0.362602,0.
 827879\O,0,-3.5678,0.580466,-1.16063\\Version=AM64L-G09RevC.01\State=1
 -A\HF=-3176.1693498\RMSD=7.218e-09\Dipole=3.4887581,-0.6087158,1.13069
 03\Quadrupole=-30.8202425,16.1339643,14.6862782,8.9882339,-16.0222807,
 2.3481521\PG=C01 [X(C27H124N9O21)]\\@


 IF IT'S NOT TRUE, IT'S WELL INVENTED -- DANTE
 Job cpu time:  0 days  6 hours 10 minutes 44.4 seconds.
 File lengths (MBytes):  RWF=    914 Int=      0 D2E=      0 Chk=     62 Scr=      1
 Normal termination of Gaussian 09 at Fri Jun 27 14:14:56 2014.
