# Supplementary material for: Geometry of the magic number H+(H2O)21water cluster by proxy
Source: Royal Society of Chemistry journal article supplement (doi:10.1039/c4cp05246c), 2015-01-01
Supplement: c4cp05246c4.out [file c4cp05246c4.out]

 Entering Gaussian System, Link 0=g09
 Input=w4.gjf
 Output=w4.out
 Initial command:
 /cm/shared/apps/gaussian/g09/l1.exe /local/10967270.millipede2.cm.cluster/Gau-13068.inp -scrdir=/local/10967270.millipede2.cm.cluster/
 Entering Link 1 = /cm/shared/apps/gaussian/g09/l1.exe PID=     13069.
  
 Copyright (c) 1988,1990,1992,1993,1995,1998,2003,2009,2011,
            Gaussian, Inc.  All Rights Reserved.
  
 This is part of the Gaussian(R) 09 program.  It is based on
 the Gaussian(R) 03 system (copyright 2003, Gaussian, Inc.),
 the Gaussian(R) 98 system (copyright 1998, Gaussian, Inc.),
 the Gaussian(R) 94 system (copyright 1995, Gaussian, Inc.),
 the Gaussian 92(TM) system (copyright 1992, Gaussian, Inc.),
 the Gaussian 90(TM) system (copyright 1990, Gaussian, Inc.),
 the Gaussian 88(TM) system (copyright 1988, Gaussian, Inc.),
 the Gaussian 86(TM) system (copyright 1986, Carnegie Mellon
 University), and the Gaussian 82(TM) system (copyright 1983,
 Carnegie Mellon University). Gaussian is a federally registered
 trademark of Gaussian, Inc.
  
 This software contains proprietary and confidential information,
 including trade secrets, belonging to Gaussian, Inc.
  
 This software is provided under written license and may be
 used, copied, transmitted, or stored only in accord with that
 written license.
  
 The following legend is applicable only to US Government
 contracts under FAR:
  
                    RESTRICTED RIGHTS LEGEND
  
 Use, reproduction and disclosure by the US Government is
 subject to restrictions as set forth in subparagraphs (a)
 and (c) of the Commercial Computer Software - Restricted
 Rights clause in FAR 52.227-19.
  
 Gaussian, Inc.
 340 Quinnipiac St., Bldg. 40, Wallingford CT 06492
  
  
 ---------------------------------------------------------------
 Warning -- This program may not be used in any manner that
 competes with the business of Gaussian, Inc. or will provide
 assistance to any competitor of Gaussian, Inc.  The licensee
 of this program is prohibited from giving any competitor of
 Gaussian, Inc. access to this program.  By using this program,
 the user acknowledges that Gaussian, Inc. is engaged in the
 business of creating and licensing software in the field of
 computational chemistry and represents and warrants to the
 licensee that it is not a competitor of Gaussian, Inc. and that
 it will not use this program in any manner prohibited above.
 ---------------------------------------------------------------
  

 Cite this work as:
 Gaussian 09, Revision C.01,
 M. J. Frisch, G. W. Trucks, H. B. Schlegel, G. E. Scuseria, 
 M. A. Robb, J. R. Cheeseman, G. Scalmani, V. Barone, B. Mennucci, 
 G. A. Petersson, H. Nakatsuji, M. Caricato, X. Li, H. P. Hratchian, 
 A. F. Izmaylov, J. Bloino, G. Zheng, J. L. Sonnenberg, M. Hada, 
 M. Ehara, K. Toyota, R. Fukuda, J. Hasegawa, M. Ishida, T. Nakajima, 
 Y. Honda, O. Kitao, H. Nakai, T. Vreven, J. A. Montgomery, Jr., 
 J. E. Peralta, F. Ogliaro, M. Bearpark, J. J. Heyd, E. Brothers, 
 K. N. Kudin, V. N. Staroverov, T. Keith, R. Kobayashi, J. Normand, 
 K. Raghavachari, A. Rendell, J. C. Burant, S. S. Iyengar, J. Tomasi, 
 M. Cossi, N. Rega, J. M. Millam, M. Klene, J. E. Knox, J. B. Cross, 
 V. Bakken, C. Adamo, J. Jaramillo, R. Gomperts, R. E. Stratmann, 
 O. Yazyev, A. J. Austin, R. Cammi, C. Pomelli, J. W. Ochterski, 
 R. L. Martin, K. Morokuma, V. G. Zakrzewski, G. A. Voth, 
 P. Salvador, J. J. Dannenberg, S. Dapprich, A. D. Daniels, 
 O. Farkas, J. B. Foresman, J. V. Ortiz, J. Cioslowski, 
 and D. J. Fox, Gaussian, Inc., Wallingford CT, 2010.
 
 ******************************************
 Gaussian 09:  AM64L-G09RevC.01 23-Sep-2011
                27-Jun-2014 
 ******************************************
 %chk=w4
 %mem=2GB
 %nprocshared=12
 Will use up to   12 processors via shared memory.
 ------------------
 # sp b3lyp/6-31+g*
 ------------------
 1/38=1/1;
 2/12=2,17=6,18=5,40=1/2;
 3/5=1,6=6,7=11,11=2,16=1,25=1,30=1,74=-5/1,2,3;
 4//1;
 5/5=2,38=5/2;
 6/7=2,8=2,9=2,10=2,28=1/1;
 99/5=1,9=1/99;
 ---------
 something
 ---------
 Charge =  1 Multiplicity = 1
 Symbolic Z-Matrix:
 H                    -2.5587   -2.48268  -0.42406 
 H                    -2.27799  -2.65749  -1.94426 
 H                    -0.1631    0.18644  -1.69385 
 H                     0.86518   0.39128  -2.84679 
 H                    -0.28624  -3.0544    0.98649 
 H                    -0.17245   2.52296   1.91407 
 H                    -0.53196   3.14494   0.47105 
 H                    -1.0895   -1.14537   0.51511 
 H                    -1.91463  -1.66172   1.75148 
 H                     0.97898   3.68753  -1.08603 
 H                     2.60437   2.24941  -1.68424 
 H                     2.76763   2.80964  -0.22077 
 H                     0.80989  -0.9496    3.55738 
 H                     0.52965   0.58993   3.74423 
 H                    -1.10098   1.69639  -2.86734 
 H                    -1.09713   3.02833  -2.0648 
 H                     2.53527  -2.23846  -1.65017 
 H                     1.45713  -2.79056   2.18785 
 H                    -2.96054   0.56097   2.23013 
 H                    -2.49215   1.90196   1.59702 
 H                     2.94394  -0.06023  -2.41462 
 H                    -0.40273   1.0075    0.4241 
 H                     0.83825   0.00716   0.30726 
 H                     1.0888   -3.52245  -0.68811 
 H                     0.56265  -3.1319   -2.12167 
 H                     1.84027   2.30529   2.66699 
 H                     3.00868   1.22039   1.21108 
 H                    -0.59583  -1.45143  -2.94214 
 H                    -1.36831  -0.61079   3.56244 
 H                     2.86675  -0.81653  -0.05597 
 H                     2.41768  -1.01366   1.47813 
 H                    -2.76067   1.45901  -1.57417 
 H                    -3.23098   0.99627  -0.13016 
 H                     6.54037  -4.29712  -3.00774 
 H                     4.77133  -4.12778  -3.20078 
 H                     5.84227  -2.77925  -3.63939 
 H                     6.05878  -4.84026  -0.5199 
 H                     5.08273  -3.64472   0.38269 
 H                     4.32413  -4.61218  -0.8965 
 H                     7.63891  -2.87568  -1.14234 
 H                     6.87393  -1.45429  -1.90582 
 H                     6.548    -1.8223   -0.19808 
 H                     5.19108  -4.00122   5.41022 
 H                     4.31111  -4.67077   4.00856 
 H                     5.24992  -3.17201   3.83022 
 H                     2.85684  -1.08311   5.59984 
 H                     4.28983  -1.79729   6.40171 
 H                     4.41954  -1.11134   4.75726 
 H                     2.93613  -3.96348   6.65609 
 H                     1.58833  -3.10692   5.85162 
 H                     2.19738  -4.63427   5.17518 
 H                    -2.15694  -5.73523   2.00439 
 H                    -1.75059  -7.47398   2.05583 
 H                    -0.8493   -6.30728   3.06355 
 H                     0.51739  -8.16309   1.02593 
 H                     1.52118  -6.84585   0.35503 
 H                     1.26806  -6.96016   2.11162 
 H                    -0.2455   -6.05825  -1.06943 
 H                    -1.38562  -7.31589  -0.50054 
 H                    -1.80445  -5.57905  -0.37782 
 H                    -1.49386  -5.34293  -6.28576 
 H                    -0.73851  -5.31039  -4.66648 
 H                    -2.43604  -4.82553  -4.85868 
 H                     0.39742  -3.78186  -7.0554 
 H                     0.62466  -2.27063  -6.12918 
 H                     1.02414  -3.83181  -5.38117 
 H                    -2.06829  -3.05788  -7.34167 
 H                    -2.97446  -2.69659  -5.84652 
 H                    -1.67629  -1.60648  -6.37567 
 H                     2.34759   0.58023  -6.34042 
 H                     3.76433   1.2407   -7.20384 
 H                     3.95256  -0.14217  -6.08976 
 H                     5.5213    2.48095  -5.76316 
 H                     5.18986   2.57264  -4.00914 
 H                     5.59261   1.00892  -4.75495 
 H                     3.01688   3.5529   -4.35857 
 H                     3.2037    3.52191  -6.13793 
 H                     1.81507   2.71217  -5.35679 
 H                    -0.42845   7.82384  -3.21682 
 H                     0.97744   6.75203  -2.95716 
 H                    -0.57011   6.06378  -3.49713 
 H                    -0.13283   8.58563  -0.77028 
 H                    -0.10596   7.30276   0.47118 
 H                     1.24714   7.45628  -0.6716 
 H                    -2.3827    7.5987   -1.56557 
 H                    -2.40131   5.85151  -1.94599 
 H                    -2.20638   6.38642  -0.2649 
 H                    -4.83623  -0.76448   6.91653 
 H                    -3.17395  -0.24086   6.52202 
 H                    -4.53139   0.30415   5.51569 
 H                    -3.96386  -3.19351   6.72791 
 H                    -3.13985  -3.62813   5.20363 
 H                    -2.36643  -2.49781   6.33387 
 H                    -5.95672  -2.40199   5.27395 
 H                    -5.58177  -1.22358   3.98476 
 H                    -4.99414  -2.89713   3.85321 
 H                     6.71093   4.80041   1.81138 
 H                     5.08709   4.81713   1.06437 
 H                     5.25313   4.57199   2.81727 
 H                     6.44825   1.14379   2.53286 
 H                     7.5501    2.53788   2.71054 
 H                     6.04224   2.45372   3.66313 
 H                     5.61332   3.03558  -0.45774 
 H                     7.28915   2.9098    0.16184 
 H                     6.21248   1.48362   0.16037 
 H                     2.64659   4.2373    5.80457 
 H                     1.46374   4.57378   7.09885 
 H                     1.74372   2.89758   6.54723 
 H                     1.55145   5.70683   4.24431 
 H                    -0.162     5.45864   3.84409 
 H                     0.28971   6.15907   5.42453 
 H                    -0.58706   2.5737    6.01463 
 H                    -1.01411   4.2328    6.52842 
 H                    -1.3962    3.66847   4.87571 
 H                    -2.84652  -1.156     3.93907 
 H                     2.50138  -2.49204   3.41197 
 H                     0.2127   -4.57609   1.08733 
 H                     0.96539   2.93452   3.88923 
 H                     4.05482   2.38985   1.59018 
 H                    -0.93022  -2.72224  -3.88275 
 H                    -0.07411   4.92362  -1.10054 
 H                     3.00444   1.01763  -3.63244 
 H                     4.12411  -2.04362  -1.57903 
 H                    -5.11473  -0.05617  -0.08926 
 H                    -6.77985  -0.7096   -0.25334 
 H                    -5.50743  -1.6772    0.55491 
 H                    -5.74719  -3.24174  -2.75457 
 H                    -5.88196  -3.52704  -1.00436 
 H                    -7.15709  -2.59586  -1.85815 
 H                    -4.86554   0.28628  -2.41393 
 H                    -5.10681  -1.05395  -3.58157 
 H                    -6.52919  -0.32359  -2.77642 
 H                    -4.30623  -1.86063  -1.47325 
 C                     5.24411  -4.09918  -0.59999 
 C                     6.72005  -2.26414  -1.18506 
 C                     4.60768  -3.74291   4.50858 
 C                     3.76722  -1.66785   5.43768 
 C                     2.48739  -3.70676   5.68018 
 C                    -1.33414  -6.45162   2.09241 
 C                     0.79459  -7.09917   1.13371 
 C                    -0.98819  -6.30439  -0.30455 
 C                    -1.44639  -4.79858  -5.32595 
 C                     0.32748  -3.32157  -6.05377 
 C                    -1.98662  -2.65447  -6.31675 
 C                     3.41665   0.79882  -6.25305 
 C                     5.06406   1.95657  -4.90514 
 C                     2.88003   2.94203  -5.25587 
 C                    -0.11088   6.82709  -2.86126 
 C                     0.16087   7.54078  -0.5635 
 C                    -1.9529    6.61579  -1.30441 
 C                    -4.13617  -0.53702   6.09318 
 C                    -3.32518  -2.81335   5.91088 
 C                    -5.18912  -2.07499   4.54987 
 C                     5.70131   4.35358   1.84236 
 C                     6.49039   2.22653   2.69034 
 C                     6.24806   2.56885   0.3015 
 C                     1.67775   3.94005   6.21968 
 C                     0.57553   5.42335   4.65188 
 C                    -0.66123   3.61442   5.68441 
 C                     5.68928  -3.59776  -2.92834 
 C                    -5.71379  -0.95296  -0.2361 
 C                    -6.08731  -2.81781  -1.80785 
 C                    -5.47278  -0.58404  -2.66617 
 N                    -3.94005  -1.68705   5.20676 
 N                     3.41612  -2.9561    4.83032 
 N                    -0.36551  -6.21276   1.02137 
 N                     0.645     4.06195   5.1886 
 N                     5.73656   2.90321   1.63421 
 N                    -1.02786  -3.40599  -5.50424 
 N                    -0.49605   6.59545  -1.46673 
 N                     3.63876   1.69363  -5.11595 
 N                     5.54926  -3.04981  -1.57674 
 N                    -5.3324   -1.56149  -1.54597 
 O                    -2.99045  -2.78962  -1.26493 
 O                    -0.08643   0.16826  -2.68566 
 O                     0.53122  -3.62643   1.00701 
 O                    -0.82005   2.49443   1.16512 
 O                    -1.56236  -1.9509    0.86693 
 O                     0.02624   3.93904  -0.94429 
 O                     2.60184   3.08189  -1.1545 
 O                     0.24487  -0.30582   4.04688 
 O                    -1.67217   2.46013  -2.62774 
 O                     3.25342  -1.54524  -1.55229 
 O                     1.92065  -2.08027   2.70553 
 O                    -3.27157   1.30734   1.66905 
 O                     2.56936   0.78951  -2.75777 
 O                    -0.09997   0.14637   0.02305 
 O                     1.36436  -3.44857  -1.6352 
 O                     0.98984   2.23392   3.17083 
 O                     3.08531   2.18182   1.44558 
 O                    -0.85194  -2.41478  -2.93268 
 O                    -2.26699  -0.83347   3.18884 
 O                     2.51497  -0.3478    0.74776 
 O                    -3.29716   0.78647  -1.08972 
 
 Stoichiometry    C30H133N10O21(1+)
 Framework group  C1[X(C30H133N10O21)]
 Deg. of freedom   576
 Full point group                 C1      NOp   1
 Largest Abelian subgroup         C1      NOp   1
 Largest concise Abelian subgroup C1      NOp   1
                         Standard orientation:                         
 ---------------------------------------------------------------------
 Center     Atomic      Atomic             Coordinates (Angstroms)
 Number     Number       Type             X           Y           Z
 ---------------------------------------------------------------------
      1          1           0       -3.589324   -0.171223   -1.465739
      2          1           0       -3.605035   -1.723529   -1.568028
      3          1           0       -0.064959   -1.594304   -1.294941
      4          1           0        0.649846   -2.919903   -0.894420
      5          1           0       -2.812217    0.561046    1.052290
      6          1           0        1.941776    2.199338   -1.535341
      7          1           0        2.247234    0.985023   -2.550497
      8          1           0       -1.654585    0.565289   -0.728632
      9          1           0       -2.518978    1.879203   -0.778796
     10          1           0        3.502198   -0.797579   -2.051265
     11          1           0        3.171604   -1.961060   -0.152590
     12          1           0        3.751397   -0.516023    0.088194
     13          1           0       -0.413222    3.061394    1.536295
     14          1           0        0.728462    3.521713    0.552295
     15          1           0        0.674568   -2.287937   -3.168073
     16          1           0        1.805520   -1.332767   -3.644252
     17          1           0       -0.630320   -2.534715    2.163271
     18          1           0       -1.625054    1.334887    2.647293
     19          1           0       -1.216630    2.898004   -2.657438
     20          1           0        0.154091    2.363642   -3.161489
     21          1           0        1.408369   -3.064786    1.134262
     22          1           0        0.523808    0.612294   -1.334589
     23          1           0        0.358198    0.064152    0.157553
     24          1           0       -2.480692   -1.442251    1.941683
     25          1           0       -2.459913   -2.639716    0.916943
     26          1           0        2.865131    2.410950    0.405779
     27          1           0        2.569893    0.581647    1.514088
     28          1           0       -1.692309   -2.917643   -1.125793
     29          1           0       -1.314130    3.634594   -0.392226
     30          1           0        0.765749   -0.884707    2.121926
     31          1           0        0.378036    0.669622    2.288424
     32          1           0       -0.409085   -0.680980   -4.020478
     33          1           0       -1.032460    0.754995   -3.756160
     34          1           0       -0.197529   -5.083585    6.092376
     35          1           0       -1.020806   -4.822199    4.527340
     36          1           0        0.686884   -5.312816    4.557605
     37          1           0       -0.879520   -2.652989    6.678346
     38          1           0       -0.394737   -1.386085    5.513614
     39          1           0       -1.637441   -2.568075    5.059334
     40          1           0        1.619389   -3.356613    6.743051
     41          1           0        2.384584   -3.709914    5.168853
     42          1           0        1.923015   -2.041909    5.572287
     43          1           0       -0.562734    3.369782    7.177462
     44          1           0       -1.623322    2.140502    6.434951
     45          1           0        0.142233    1.952472    6.351807
     46          1           0        0.617848    4.515699    3.816941
     47          1           0        0.809948    4.844179    5.566715
     48          1           0        1.432373    3.328089    4.855642
     49          1           0       -1.740162    5.111936    5.688510
     50          1           0       -1.766506    4.780331    3.931588
     51          1           0       -2.726087    3.772530    5.038318
     52          1           0       -6.064408    1.614814    1.240161
     53          1           0       -7.301182    1.325650    2.496263
     54          1           0       -5.817590    2.240269    2.885420
     55          1           0       -6.659994   -0.302495    4.398183
     56          1           0       -5.018420   -1.004607    4.326740
     57          1           0       -5.226845    0.728127    4.668696
     58          1           0       -5.339424   -1.841323    2.097971
     59          1           0       -7.006642   -1.196340    2.000232
     60          1           0       -5.775763   -0.737090    0.783220
     61          1           0       -5.493426   -6.455976   -0.723635
     62          1           0       -5.031901   -5.076166    0.314059
     63          1           0       -5.551574   -4.787292   -1.359305
     64          1           0       -3.165825   -7.431532   -0.237016
     65          1           0       -1.761146   -6.386087   -0.593750
     66          1           0       -2.842706   -5.979581    0.755831
     67          1           0       -3.904231   -7.016017   -2.679953
     68          1           0       -4.072768   -5.312207   -3.185696
     69          1           0       -2.459522   -5.980082   -2.861712
     70          1           0        1.564847   -6.605721   -0.767057
     71          1           0        2.877396   -7.682831   -0.213959
     72          1           0        1.835725   -6.849235    0.973041
     73          1           0        4.894487   -6.546733    0.944206
     74          1           0        4.816221   -4.769129    1.114051
     75          1           0        3.712883   -5.799267    2.054860
     76          1           0        4.451179   -4.448796   -1.245818
     77          1           0        4.501313   -6.207712   -1.570908
     78          1           0        3.077659   -5.237117   -2.045573
     79          1           0        6.175728   -1.934220   -5.948757
     80          1           0        6.045290   -2.169938   -4.182368
     81          1           0        4.618136   -2.413987   -5.213784
     82          1           0        7.010727    0.451813   -5.436000
     83          1           0        5.966968    1.460310   -4.396200
     84          1           0        6.815609    0.059613   -3.704648
     85          1           0        4.947201    0.089036   -6.945543
     86          1           0        3.465925   -0.514597   -6.146052
     87          1           0        4.044831    1.128469   -5.806348
     88          1           0       -3.281905    7.666405   -2.173343
     89          1           0       -1.943832    6.962140   -1.221208
     90          1           0       -2.239670    6.395618   -2.877684
     91          1           0       -4.847620    6.939205   -0.245517
     92          1           0       -4.785721    5.216887    0.224703
     93          1           0       -3.400469    6.274798    0.564031
     94          1           0       -5.288828    6.128817   -2.666384
     95          1           0       -4.114750    4.963781   -3.341277
     96          1           0       -5.200816    4.464433   -2.024274
     97          1           0        7.596192    0.769373    2.772910
     98          1           0        6.715944    0.442478    1.251902
     99          1           0        6.625787    2.053189    1.998764
    100          1           0        4.396123    1.018006    4.685536
    101          1           0        6.167690    1.118549    4.886957
    102          1           0        5.290300    2.383150    3.981903
    103          1           0        5.485925   -1.393446    2.192166
    104          1           0        6.301145   -1.216590    3.777171
    105          1           0        4.518886   -1.158275    3.661576
    106          1           0        4.969604    5.501249    0.904246
    107          1           0        4.626827    7.074804    0.133569
    108          1           0        3.365116    6.245046    1.088506
    109          1           0        5.584109    4.467970   -1.180935
    110          1           0        4.437845    4.459004   -2.538763
    111          1           0        5.293877    5.966867   -2.107495
    112          1           0        1.817562    6.246105   -0.762481
    113          1           0        2.984360    7.072336   -1.837140
    114          1           0        2.279345    5.497253   -2.304023
    115          1           0       -2.570417    4.274626   -1.189918
    116          1           0       -0.788877    2.302739    3.668132
    117          1           0       -3.815814    0.327318    2.282256
    118          1           0        2.934476    3.882206   -0.291227
    119          1           0        4.125598    0.857901    1.844586
    120          1           0       -2.953810   -3.917902   -0.985735
    121          1           0        3.965927   -0.387913   -3.552680
    122          1           0        2.328022   -4.099938    0.279145
    123          1           0        0.398665   -2.819565    3.358046
    124          1           0       -2.939738    1.099048   -4.705765
    125          1           0       -4.396259    1.249193   -5.746201
    126          1           0       -4.504031    1.587060   -3.990406
    127          1           0       -5.994429   -1.753020   -4.274174
    128          1           0       -6.281990   -0.078475   -3.748815
    129          1           0       -6.206902   -0.464509   -5.500201
    130          1           0       -2.550216   -1.146981   -5.327910
    131          1           0       -3.822541   -2.397328   -5.139167
    132          1           0       -3.972245   -1.181811   -6.444910
    133          1           0       -4.033405   -0.674878   -3.488294
    134          6           0       -0.702262   -2.432113    5.611063
    135          6           0        1.631821   -3.092870    5.670486
    136          6           0       -0.676412    2.678817    6.323249
    137          6           0        0.620345    4.060823    4.811974
    138          6           0       -1.782968    4.317151    4.922901
    139          6           0       -6.216415    1.403040    2.303179
    140          6           0       -5.615106   -0.117590    4.090926
    141          6           0       -5.939048   -0.962716    1.841616
    142          6           0       -4.997182   -5.469435   -0.706767
    143          6           0       -2.803385   -6.388371   -0.258771
    144          6           0       -3.506677   -5.994655   -2.543416
    145          6           0        2.331167   -6.747279    0.001721
    146          6           0        4.218106   -5.685559    1.089572
    147          6           0        3.851396   -5.363109   -1.282280
    148          6           0        5.517461   -1.806895   -5.070547
    149          6           0        6.296988    0.435201   -4.592775
    150          6           0        4.360259    0.100706   -6.010445
    151          6           0       -2.721989    6.739220   -1.957591
    152          6           0       -4.192910    6.053979   -0.157747
    153          6           0       -4.607234    5.294680   -2.421283
    154          6           0        6.672445    0.978755    2.204755
    155          6           0        5.329607    1.309541    4.193077
    156          6           0        5.450655   -0.880543    3.158011
    157          6           0        4.199036    6.090769    0.396293
    158          6           0        4.821130    5.053850   -1.703915
    159          6           0        2.645512    6.090983   -1.461109
    160          6           0       -0.072799   -4.706519    5.061829
    161          6           0       -4.020106    0.976836   -4.756081
    162          6           0       -5.810286   -0.703011   -4.509225
    163          6           0       -3.614337   -1.364846   -5.427861
    164          7           0       -3.592733    5.680836   -1.439524
    165          7           0       -0.660101    3.382386    5.039845
    166          7           0       -5.504354    0.175140    2.660461
    167          7           0        3.724571    5.364025   -0.783234
    168          7           0        5.471944    0.568977    2.938935
    169          7           0       -3.603785   -5.547635   -1.152402
    170          7           0        5.133563   -0.406769   -4.873066
    171          7           0        3.218975   -5.583520    0.023559
    172          7           0        0.330068   -3.298109    5.034282
    173          7           0       -4.341860   -0.457644   -4.491022
    174          8           0       -4.093795   -0.918543   -1.883714
    175          8           0       -0.052718   -2.568270   -1.497756
    176          8           0       -2.846994    0.305717    2.016389
    177          8           0        1.554728    1.630655   -2.248028
    178          8           0       -2.582578    0.904733   -0.587717
    179          8           0        3.196817   -0.398437   -2.910620
    180          8           0        3.876182   -1.335842   -0.446402
    181          8           0       -0.173587    3.756374    0.878348
    182          8           0        1.007901   -1.814976   -3.963159
    183          8           0        0.343375   -2.516310    2.402967
    184          8           0       -0.769567    1.820016    2.789232
    185          8           0       -0.767790    2.536864   -3.455403
    186          8           0        1.912466   -3.186946    0.291006
    187          8           0       -0.039601    0.034911   -0.748715
    188          8           0       -2.282362   -2.408063    1.862714
    189          8           0        2.349753    3.088750   -0.101322
    190          8           0        3.421483    0.922103    1.134490
    191          8           0       -2.639668   -2.980974   -0.822109
    192          8           0       -1.995276    3.459751   -1.100928
    193          8           0        0.979082    0.036905    1.814410
    194          8           0       -1.258232   -0.180393   -3.964082
 ---------------------------------------------------------------------
 Rotational constants (GHZ):      0.0238147      0.0230483      0.0211063
 Standard basis: 6-31+G(d) (6D, 7F)
 There are  1425 symmetry adapted basis functions of A   symmetry.
 Integral buffers will be    131072 words long.
 Raffenetti 2 integral format.
 Two-electron integral symmetry is turned on.
  1425 basis functions,  2484 primitive gaussians,  1425 cartesian basis functions
   275 alpha electrons      275 beta electrons
       nuclear repulsion energy     12474.4006792722 Hartrees.
 NAtoms=  194 NActive=  194 NUniq=  194 SFac= 1.00D+00 NAtFMM=   60 NAOKFM=T Big=T
 One-electron integrals computed using PRISM.
 NBasis=  1425 RedAO= T  NBF=  1425
 NBsUse=  1425 1.00D-06 NBFU=  1425
 Harris functional with IExCor=  402 diagonalized for initial guess.
 ExpMin= 4.38D-02 ExpMax= 5.48D+03 ExpMxC= 8.25D+02 IAcc=2 IRadAn=         4 AccDes= 0.00D+00
 HarFok:  IExCor=  402 AccDes= 0.00D+00 IRadAn=         4 IDoV= 1
 ScaDFX=  1.000000  1.000000  1.000000  1.000000
 FoFCou: FMM=F IPFlag=           0 FMFlag=      100000 FMFlg1=        2001
         NFxFlg=           0 DoJE=T BraDBF=F KetDBF=T FulRan=T
         Omega=  0.000000  0.000000  1.000000  0.000000  0.000000 ICntrl=     500 IOpCl=  0
         NMat0=    1 NMatS0=    1 NMatT0=    0 NMatD0=    1 NMtDS0=    0 NMtDT0=    0
         I1Cent=           4 NGrid=           0.
 Petite list used in FoFCou.
 Initial guess orbital symmetries:
       Occupied  (A) (A) (A) (A) (A) (A) (A) (A) (A) (A) (A) (A)
                 (A) (A) (A) (A) (A) (A) (A) (A) (A) (A) (A) (A)
                 (A) (A) (A) (A) (A) (A) (A) (A) (A) (A) (A) (A)
                 (A) (A) (A) (A) (A) (A) (A) (A) (A) (A) (A) (A)
                 (A) (A) (A) (A) (A) (A) (A) (A) (A) (A) (A) (A)
                 (A) (A) (A) (A) (A) (A) (A) (A) (A) (A) (A) (A)
                 (A) (A) (A) (A) (A) (A) (A) (A) (A) (A) (A) (A)
                 (A) (A) (A) (A) (A) (A) (A) (A) (A) (A) (A) (A)
                 (A) (A) (A) (A) (A) (A) (A) (A) (A) (A) (A) (A)
                 (A) (A) (A) (A) (A) (A) (A) (A) (A) (A) (A) (A)
                 (A) (A) (A) (A) (A) (A) (A) (A) (A) (A) (A) (A)
                 (A) (A) (A) (A) (A) (A) (A) (A) (A) (A) (A) (A)
                 (A) (A) (A) (A) (A) (A) (A) (A) (A) (A) (A) (A)
                 (A) (A) (A) (A) (A) (A) (A) (A) (A) (A) (A) (A)
                 (A) (A) (A) (A) (A) (A) (A) (A) (A) (A) (A) (A)
                 (A) (A) (A) (A) (A) (A) (A) (A) (A) (A) (A) (A)
                 (A) (A) (A) (A) (A) (A) (A) (A) (A) (A) (A) (A)
                 (A) (A) (A) (A) (A) (A) (A) (A) (A) (A) (A) (A)
                 (A) (A) (A) (A) (A) (A) (A) (A) (A) (A) (A) (A)
                 (A) (A) (A) (A) (A) (A) (A) (A) (A) (A) (A) (A)
                 (A) (A) (A) (A) (A) (A) (A) (A) (A) (A) (A) (A)
                 (A) (A) (A) (A) (A) (A) (A) (A) (A) (A) (A) (A)
                 (A) (A) (A) (A) (A) (A) (A) (A) (A) (A) (A)
       Virtual   (A) (A) (A) (A) (A) (A) (A) (A) (A) (A) (A) (A)
                 (A) (A) (A) (A) (A) (A) (A) (A) (A) (A) (A) (A)
                 (A) (A) (A) (A) (A) (A) (A) (A) (A) (A) (A) (A)
                 (A) (A) (A) (A) (A) (A) (A) (A) (A) (A) (A) (A)
                 (A) (A) (A) (A) (A) (A) (A) (A) (A) (A) (A) (A)
                 (A) (A) (A) (A) (A) (A) (A) (A) (A) (A) (A) (A)
                 (A) (A) (A) (A) (A) (A) (A) (A) (A) (A) (A) (A)
                 (A) (A) (A) (A) (A) (A) (A) (A) (A) (A) (A) (A)
                 (A) (A) (A) (A) (A) (A) (A) (A) (A) (A) (A) (A)
                 (A) (A) (A) (A) (A) (A) (A) (A) (A) (A) (A) (A)
                 (A) (A) (A) (A) (A) (A) (A) (A) (A) (A) (A) (A)
                 (A) (A) (A) (A) (A) (A) (A) (A) (A) (A) (A) (A)
                 (A) (A) (A) (A) (A) (A) (A) (A) (A) (A) (A) (A)
                 (A) (A) (A) (A) (A) (A) (A) (A) (A) (A) (A) (A)
                 (A) (A) (A) (A) (A) (A) (A) (A) (A) (A) (A) (A)
                 (A) (A) (A) (A) (A) (A) (A) (A) (A) (A) (A) (A)
                 (A) (A) (A) (A) (A) (A) (A) (A) (A) (A) (A) (A)
                 (A) (A) (A) (A) (A) (A) (A) (A) (A) (A) (A) (A)
                 (A) (A) (A) (A) (A) (A) (A) (A) (A) (A) (A) (A)
                 (A) (A) (A) (A) (A) (A) (A) (A) (A) (A) (A) (A)
                 (A) (A) (A) (A) (A) (A) (A) (A) (A) (A) (A) (A)
                 (A) (A) (A) (A) (A) (A) (A) (A) (A) (A) (A) (A)
                 (A) (A) (A) (A) (A) (A) (A) (A) (A) (A) (A) (A)
                 (A) (A) (A) (A) (A) (A) (A) (A) (A) (A) (A) (A)
                 (A) (A) (A) (A) (A) (A) (A) (A) (A) (A) (A) (A)
                 (A) (A) (A) (A) (A) (A) (A) (A) (A) (A) (A) (A)
                 (A) (A) (A) (A) (A) (A) (A) (A) (A) (A) (A) (A)
                 (A) (A) (A) (A) (A) (A) (A) (A) (A) (A) (A) (A)
                 (A) (A) (A) (A) (A) (A) (A) (A) (A) (A) (A) (A)
                 (A) (A) (A) (A) (A) (A) (A) (A) (A) (A) (A) (A)
                 (A) (A) (A) (A) (A) (A) (A) (A) (A) (A) (A) (A)
                 (A) (A) (A) (A) (A) (A) (A) (A) (A) (A) (A) (A)
                 (A) (A) (A) (A) (A) (A) (A) (A) (A) (A) (A) (A)
                 (A) (A) (A) (A) (A) (A) (A) (A) (A) (A) (A) (A)
                 (A) (A) (A) (A) (A) (A) (A) (A) (A) (A) (A) (A)
                 (A) (A) (A) (A) (A) (A) (A) (A) (A) (A) (A) (A)
                 (A) (A) (A) (A) (A) (A) (A) (A) (A) (A) (A) (A)
                 (A) (A) (A) (A) (A) (A) (A) (A) (A) (A) (A) (A)
                 (A) (A) (A) (A) (A) (A) (A) (A) (A) (A) (A) (A)
                 (A) (A) (A) (A) (A) (A) (A) (A) (A) (A) (A) (A)
                 (A) (A) (A) (A) (A) (A) (A) (A) (A) (A) (A) (A)
                 (A) (A) (A) (A) (A) (A) (A) (A) (A) (A) (A) (A)
                 (A) (A) (A) (A) (A) (A) (A) (A) (A) (A) (A) (A)
                 (A) (A) (A) (A) (A) (A) (A) (A) (A) (A) (A) (A)
                 (A) (A) (A) (A) (A) (A) (A) (A) (A) (A) (A) (A)
                 (A) (A) (A) (A) (A) (A) (A) (A) (A) (A) (A) (A)
                 (A) (A) (A) (A) (A) (A) (A) (A) (A) (A) (A) (A)
                 (A) (A) (A) (A) (A) (A) (A) (A) (A) (A) (A) (A)
                 (A) (A) (A) (A) (A) (A) (A) (A) (A) (A) (A) (A)
                 (A) (A) (A) (A) (A) (A) (A) (A) (A) (A) (A) (A)
                 (A) (A) (A) (A) (A) (A) (A) (A) (A) (A) (A) (A)
                 (A) (A) (A) (A) (A) (A) (A) (A) (A) (A) (A) (A)
                 (A) (A) (A) (A) (A) (A) (A) (A) (A) (A) (A) (A)
                 (A) (A) (A) (A) (A) (A) (A) (A) (A) (A) (A) (A)
                 (A) (A) (A) (A) (A) (A) (A) (A) (A) (A) (A) (A)
                 (A) (A) (A) (A) (A) (A) (A) (A) (A) (A) (A) (A)
                 (A) (A) (A) (A) (A) (A) (A) (A) (A) (A) (A) (A)
                 (A) (A) (A) (A) (A) (A) (A) (A) (A) (A) (A) (A)
                 (A) (A) (A) (A) (A) (A) (A) (A) (A) (A) (A) (A)
                 (A) (A) (A) (A) (A) (A) (A) (A) (A) (A) (A) (A)
                 (A) (A) (A) (A) (A) (A) (A) (A) (A) (A) (A) (A)
                 (A) (A) (A) (A) (A) (A) (A) (A) (A) (A) (A) (A)
                 (A) (A) (A) (A) (A) (A) (A) (A) (A) (A) (A) (A)
                 (A) (A) (A) (A) (A) (A) (A) (A) (A) (A) (A) (A)
                 (A) (A) (A) (A) (A) (A) (A) (A) (A) (A) (A) (A)
                 (A) (A) (A) (A) (A) (A) (A) (A) (A) (A) (A) (A)
                 (A) (A) (A) (A) (A) (A) (A) (A) (A) (A) (A) (A)
                 (A) (A) (A) (A) (A) (A) (A) (A) (A) (A) (A) (A)
                 (A) (A) (A) (A) (A) (A) (A) (A) (A) (A) (A) (A)
                 (A) (A) (A) (A) (A) (A) (A) (A) (A) (A) (A) (A)
                 (A) (A) (A) (A) (A) (A) (A) (A) (A) (A) (A) (A)
                 (A) (A) (A) (A) (A) (A) (A) (A) (A) (A) (A) (A)
                 (A) (A) (A) (A) (A) (A) (A) (A) (A) (A) (A) (A)
                 (A) (A) (A) (A) (A) (A) (A) (A) (A) (A) (A) (A)
                 (A) (A) (A) (A) (A) (A) (A) (A) (A) (A) (A) (A)
                 (A) (A) (A) (A) (A) (A) (A) (A) (A) (A) (A) (A)
                 (A) (A) (A) (A) (A) (A) (A) (A) (A) (A) (A) (A)
                 (A) (A) (A) (A) (A) (A) (A) (A) (A) (A) (A) (A)
                 (A) (A) (A) (A) (A) (A) (A) (A) (A) (A) (A) (A)
                 (A) (A) (A) (A) (A) (A) (A) (A) (A) (A) (A) (A)
                 (A) (A) (A) (A) (A) (A) (A) (A) (A) (A) (A) (A)
                 (A) (A) (A) (A) (A) (A) (A) (A) (A) (A) (A) (A)
                 (A) (A) (A) (A) (A) (A) (A) (A) (A) (A) (A) (A)
                 (A) (A) (A) (A) (A) (A) (A) (A) (A) (A) (A) (A)
                 (A) (A) (A) (A) (A) (A) (A) (A) (A) (A) (A) (A)
                 (A) (A) (A) (A) (A) (A) (A) (A) (A) (A) (A) (A)
                 (A) (A) (A) (A) (A) (A) (A) (A) (A) (A) (A) (A)
                 (A) (A) (A) (A) (A) (A) (A) (A) (A) (A) (A) (A)
                 (A) (A) (A) (A) (A) (A) (A) (A) (A) (A) (A) (A)
                 (A) (A) (A) (A) (A) (A) (A) (A) (A) (A) (A) (A)
                 (A) (A) (A) (A) (A) (A) (A) (A) (A) (A) (A) (A)
                 (A) (A) (A) (A) (A) (A) (A) (A) (A) (A) (A) (A)
                 (A) (A) (A) (A) (A) (A) (A) (A) (A) (A) (A) (A)
                 (A) (A) (A) (A) (A) (A) (A) (A) (A) (A) (A) (A)
                 (A) (A) (A) (A) (A) (A) (A) (A) (A) (A) (A) (A)
                 (A) (A) (A) (A) (A) (A) (A) (A) (A) (A)
 The electronic state of the initial guess is 1-A.
 Requested convergence on RMS density matrix=1.00D-08 within 128 cycles.
 Requested convergence on MAX density matrix=1.00D-06.
 Requested convergence on             energy=1.00D-06.
 No special actions if energy rises.
 SCF Done:  E(RB3LYP) =  -3350.65770204     A.U. after   11 cycles
             Convg  =    0.7781D-08             -V/T =  2.0096

 **********************************************************************

            Population analysis using the SCF density.

 **********************************************************************

 Orbital symmetries:
       Occupied  (A) (A) (A) (A) (A) (A) (A) (A) (A) (A) (A) (A)
                 (A) (A) (A) (A) (A) (A) (A) (A) (A) (A) (A) (A)
                 (A) (A) (A) (A) (A) (A) (A) (A) (A) (A) (A) (A)
                 (A) (A) (A) (A) (A) (A) (A) (A) (A) (A) (A) (A)
                 (A) (A) (A) (A) (A) (A) (A) (A) (A) (A) (A) (A)
                 (A) (A) (A) (A) (A) (A) (A) (A) (A) (A) (A) (A)
                 (A) (A) (A) (A) (A) (A) (A) (A) (A) (A) (A) (A)
                 (A) (A) (A) (A) (A) (A) (A) (A) (A) (A) (A) (A)
                 (A) (A) (A) (A) (A) (A) (A) (A) (A) (A) (A) (A)
                 (A) (A) (A) (A) (A) (A) (A) (A) (A) (A) (A) (A)
                 (A) (A) (A) (A) (A) (A) (A) (A) (A) (A) (A) (A)
                 (A) (A) (A) (A) (A) (A) (A) (A) (A) (A) (A) (A)
                 (A) (A) (A) (A) (A) (A) (A) (A) (A) (A) (A) (A)
                 (A) (A) (A) (A) (A) (A) (A) (A) (A) (A) (A) (A)
                 (A) (A) (A) (A) (A) (A) (A) (A) (A) (A) (A) (A)
                 (A) (A) (A) (A) (A) (A) (A) (A) (A) (A) (A) (A)
                 (A) (A) (A) (A) (A) (A) (A) (A) (A) (A) (A) (A)
                 (A) (A) (A) (A) (A) (A) (A) (A) (A) (A) (A) (A)
                 (A) (A) (A) (A) (A) (A) (A) (A) (A) (A) (A) (A)
                 (A) (A) (A) (A) (A) (A) (A) (A) (A) (A) (A) (A)
                 (A) (A) (A) (A) (A) (A) (A) (A) (A) (A) (A) (A)
                 (A) (A) (A) (A) (A) (A) (A) (A) (A) (A) (A) (A)
                 (A) (A) (A) (A) (A) (A) (A) (A) (A) (A) (A)
       Virtual   (A) (A) (A) (A) (A) (A) (A) (A) (A) (A) (A) (A)
                 (A) (A) (A) (A) (A) (A) (A) (A) (A) (A) (A) (A)
                 (A) (A) (A) (A) (A) (A) (A) (A) (A) (A) (A) (A)
                 (A) (A) (A) (A) (A) (A) (A) (A) (A) (A) (A) (A)
                 (A) (A) (A) (A) (A) (A) (A) (A) (A) (A) (A) (A)
                 (A) (A) (A) (A) (A) (A) (A) (A) (A) (A) (A) (A)
                 (A) (A) (A) (A) (A) (A) (A) (A) (A) (A) (A) (A)
                 (A) (A) (A) (A) (A) (A) (A) (A) (A) (A) (A) (A)
                 (A) (A) (A) (A) (A) (A) (A) (A) (A) (A) (A) (A)
                 (A) (A) (A) (A) (A) (A) (A) (A) (A) (A) (A) (A)
                 (A) (A) (A) (A) (A) (A) (A) (A) (A) (A) (A) (A)
                 (A) (A) (A) (A) (A) (A) (A) (A) (A) (A) (A) (A)
                 (A) (A) (A) (A) (A) (A) (A) (A) (A) (A) (A) (A)
                 (A) (A) (A) (A) (A) (A) (A) (A) (A) (A) (A) (A)
                 (A) (A) (A) (A) (A) (A) (A) (A) (A) (A) (A) (A)
                 (A) (A) (A) (A) (A) (A) (A) (A) (A) (A) (A) (A)
                 (A) (A) (A) (A) (A) (A) (A) (A) (A) (A) (A) (A)
                 (A) (A) (A) (A) (A) (A) (A) (A) (A) (A) (A) (A)
                 (A) (A) (A) (A) (A) (A) (A) (A) (A) (A) (A) (A)
                 (A) (A) (A) (A) (A) (A) (A) (A) (A) (A) (A) (A)
                 (A) (A) (A) (A) (A) (A) (A) (A) (A) (A) (A) (A)
                 (A) (A) (A) (A) (A) (A) (A) (A) (A) (A) (A) (A)
                 (A) (A) (A) (A) (A) (A) (A) (A) (A) (A) (A) (A)
                 (A) (A) (A) (A) (A) (A) (A) (A) (A) (A) (A) (A)
                 (A) (A) (A) (A) (A) (A) (A) (A) (A) (A) (A) (A)
                 (A) (A) (A) (A) (A) (A) (A) (A) (A) (A) (A) (A)
                 (A) (A) (A) (A) (A) (A) (A) (A) (A) (A) (A) (A)
                 (A) (A) (A) (A) (A) (A) (A) (A) (A) (A) (A) (A)
                 (A) (A) (A) (A) (A) (A) (A) (A) (A) (A) (A) (A)
                 (A) (A) (A) (A) (A) (A) (A) (A) (A) (A) (A) (A)
                 (A) (A) (A) (A) (A) (A) (A) (A) (A) (A) (A) (A)
                 (A) (A) (A) (A) (A) (A) (A) (A) (A) (A) (A) (A)
                 (A) (A) (A) (A) (A) (A) (A) (A) (A) (A) (A) (A)
                 (A) (A) (A) (A) (A) (A) (A) (A) (A) (A) (A) (A)
                 (A) (A) (A) (A) (A) (A) (A) (A) (A) (A) (A) (A)
                 (A) (A) (A) (A) (A) (A) (A) (A) (A) (A) (A) (A)
                 (A) (A) (A) (A) (A) (A) (A) (A) (A) (A) (A) (A)
                 (A) (A) (A) (A) (A) (A) (A) (A) (A) (A) (A) (A)
                 (A) (A) (A) (A) (A) (A) (A) (A) (A) (A) (A) (A)
                 (A) (A) (A) (A) (A) (A) (A) (A) (A) (A) (A) (A)
                 (A) (A) (A) (A) (A) (A) (A) (A) (A) (A) (A) (A)
                 (A) (A) (A) (A) (A) (A) (A) (A) (A) (A) (A) (A)
                 (A) (A) (A) (A) (A) (A) (A) (A) (A) (A) (A) (A)
                 (A) (A) (A) (A) (A) (A) (A) (A) (A) (A) (A) (A)
                 (A) (A) (A) (A) (A) (A) (A) (A) (A) (A) (A) (A)
                 (A) (A) (A) (A) (A) (A) (A) (A) (A) (A) (A) (A)
                 (A) (A) (A) (A) (A) (A) (A) (A) (A) (A) (A) (A)
                 (A) (A) (A) (A) (A) (A) (A) (A) (A) (A) (A) (A)
                 (A) (A) (A) (A) (A) (A) (A) (A) (A) (A) (A) (A)
                 (A) (A) (A) (A) (A) (A) (A) (A) (A) (A) (A) (A)
                 (A) (A) (A) (A) (A) (A) (A) (A) (A) (A) (A) (A)
                 (A) (A) (A) (A) (A) (A) (A) (A) (A) (A) (A) (A)
                 (A) (A) (A) (A) (A) (A) (A) (A) (A) (A) (A) (A)
                 (A) (A) (A) (A) (A) (A) (A) (A) (A) (A) (A) (A)
                 (A) (A) (A) (A) (A) (A) (A) (A) (A) (A) (A) (A)
                 (A) (A) (A) (A) (A) (A) (A) (A) (A) (A) (A) (A)
                 (A) (A) (A) (A) (A) (A) (A) (A) (A) (A) (A) (A)
                 (A) (A) (A) (A) (A) (A) (A) (A) (A) (A) (A) (A)
                 (A) (A) (A) (A) (A) (A) (A) (A) (A) (A) (A) (A)
                 (A) (A) (A) (A) (A) (A) (A) (A) (A) (A) (A) (A)
                 (A) (A) (A) (A) (A) (A) (A) (A) (A) (A) (A) (A)
                 (A) (A) (A) (A) (A) (A) (A) (A) (A) (A) (A) (A)
                 (A) (A) (A) (A) (A) (A) (A) (A) (A) (A) (A) (A)
                 (A) (A) (A) (A) (A) (A) (A) (A) (A) (A) (A) (A)
                 (A) (A) (A) (A) (A) (A) (A) (A) (A) (A) (A) (A)
                 (A) (A) (A) (A) (A) (A) (A) (A) (A) (A) (A) (A)
                 (A) (A) (A) (A) (A) (A) (A) (A) (A) (A) (A) (A)
                 (A) (A) (A) (A) (A) (A) (A) (A) (A) (A) (A) (A)
                 (A) (A) (A) (A) (A) (A) (A) (A) (A) (A) (A) (A)
                 (A) (A) (A) (A) (A) (A) (A) (A) (A) (A) (A) (A)
                 (A) (A) (A) (A) (A) (A) (A) (A) (A) (A) (A) (A)
                 (A) (A) (A) (A) (A) (A) (A) (A) (A) (A) (A) (A)
                 (A) (A) (A) (A) (A) (A) (A) (A) (A) (A) (A) (A)
                 (A) (A) (A) (A) (A) (A) (A) (A) (A) (A) (A) (A)
                 (A) (A) (A) (A) (A) (A) (A) (A) (A) (A) (A) (A)
                 (A) (A) (A) (A) (A) (A) (A) (A) (A) (A) (A) (A)
                 (A) (A) (A) (A) (A) (A) (A) (A) (A) (A) (A) (A)
                 (A) (A) (A) (A) (A) (A) (A) (A) (A) (A) (A) (A)
                 (A) (A) (A) (A) (A) (A) (A) (A) (A) (A) (A) (A)
                 (A) (A) (A) (A) (A) (A) (A) (A) (A) (A) (A) (A)
                 (A) (A) (A) (A) (A) (A) (A) (A) (A) (A) (A) (A)
                 (A) (A) (A) (A) (A) (A) (A) (A) (A) (A) (A) (A)
                 (A) (A) (A) (A) (A) (A) (A) (A) (A) (A) (A) (A)
                 (A) (A) (A) (A) (A) (A) (A) (A) (A) (A) (A) (A)
                 (A) (A) (A) (A) (A) (A) (A) (A) (A) (A) (A) (A)
                 (A) (A) (A) (A) (A) (A) (A) (A) (A) (A) (A) (A)
                 (A) (A) (A) (A) (A) (A) (A) (A) (A) (A) (A) (A)
                 (A) (A) (A) (A) (A) (A) (A) (A) (A) (A) (A) (A)
                 (A) (A) (A) (A) (A) (A) (A) (A) (A) (A) (A) (A)
                 (A) (A) (A) (A) (A) (A) (A) (A) (A) (A) (A) (A)
                 (A) (A) (A) (A) (A) (A) (A) (A) (A) (A) (A) (A)
                 (A) (A) (A) (A) (A) (A) (A) (A) (A) (A) (A) (A)
                 (A) (A) (A) (A) (A) (A) (A) (A) (A) (A) (A) (A)
                 (A) (A) (A) (A) (A) (A) (A) (A) (A) (A) (A) (A)
                 (A) (A) (A) (A) (A) (A) (A) (A) (A) (A) (A) (A)
                 (A) (A) (A) (A) (A) (A) (A) (A) (A) (A)
 The electronic state is 1-A.
 Alpha  occ. eigenvalues --  -19.19836 -19.19716 -19.19512 -19.19388 -19.19355
 Alpha  occ. eigenvalues --  -19.19332 -19.19255 -19.19225 -19.19200 -19.19162
 Alpha  occ. eigenvalues --  -19.19074 -19.18600 -19.18486 -19.18439 -19.18396
 Alpha  occ. eigenvalues --  -19.18164 -19.17917 -19.17908 -19.16512 -19.16032
 Alpha  occ. eigenvalues --  -19.15147 -14.50497 -14.42091 -14.42006 -14.41785
 Alpha  occ. eigenvalues --  -14.41752 -14.41715 -14.41470 -14.41466 -14.41384
 Alpha  occ. eigenvalues --  -14.40322 -10.31350 -10.29758 -10.29357 -10.28141
 Alpha  occ. eigenvalues --  -10.28022 -10.27846 -10.27815 -10.27747 -10.27732
 Alpha  occ. eigenvalues --  -10.27729 -10.27666 -10.27657 -10.27591 -10.27540
 Alpha  occ. eigenvalues --  -10.27539 -10.27493 -10.27491 -10.27476 -10.27415
 Alpha  occ. eigenvalues --  -10.27393 -10.27390 -10.27323 -10.27192 -10.27057
 Alpha  occ. eigenvalues --  -10.26942 -10.26863 -10.26809 -10.26412 -10.26095
 Alpha  occ. eigenvalues --  -10.25875  -1.07099  -1.06898  -1.06049  -1.05774
 Alpha  occ. eigenvalues --   -1.05721  -1.05156  -1.04959  -1.04891  -1.04685
 Alpha  occ. eigenvalues --   -1.04594  -1.04086  -1.03947  -1.03247  -1.03085
 Alpha  occ. eigenvalues --   -1.02990  -1.02879  -1.02529  -1.02307  -1.01974
 Alpha  occ. eigenvalues --   -1.01794  -1.01128  -1.00153  -1.00059  -0.99863
 Alpha  occ. eigenvalues --   -0.99860  -0.99833  -0.99752  -0.99584  -0.99520
 Alpha  occ. eigenvalues --   -0.99427  -0.98409  -0.81664  -0.80908  -0.78421
 Alpha  occ. eigenvalues --   -0.78282  -0.78207  -0.78093  -0.78067  -0.78027
 Alpha  occ. eigenvalues --   -0.78012  -0.77959  -0.77869  -0.77866  -0.77798
 Alpha  occ. eigenvalues --   -0.77673  -0.77631  -0.77617  -0.77455  -0.77410
 Alpha  occ. eigenvalues --   -0.76646  -0.76399  -0.72871  -0.67046  -0.66932
 Alpha  occ. eigenvalues --   -0.66738  -0.66737  -0.66624  -0.66482  -0.66394
 Alpha  occ. eigenvalues --   -0.66301  -0.65281  -0.62694  -0.59793  -0.59375
 Alpha  occ. eigenvalues --   -0.59111  -0.58447  -0.58245  -0.58113  -0.57963
 Alpha  occ. eigenvalues --   -0.57857  -0.57612  -0.57580  -0.57473  -0.57337
 Alpha  occ. eigenvalues --   -0.57227  -0.56922  -0.56721  -0.56493  -0.56310
 Alpha  occ. eigenvalues --   -0.56211  -0.56097  -0.55872  -0.54886  -0.54450
 Alpha  occ. eigenvalues --   -0.54385  -0.54289  -0.54220  -0.54168  -0.54114
 Alpha  occ. eigenvalues --   -0.54110  -0.54068  -0.54063  -0.53982  -0.53964
 Alpha  occ. eigenvalues --   -0.53865  -0.53865  -0.53828  -0.53745  -0.53727
 Alpha  occ. eigenvalues --   -0.53708  -0.53685  -0.53624  -0.53622  -0.53467
 Alpha  occ. eigenvalues --   -0.53421  -0.53223  -0.53181  -0.53112  -0.53070
 Alpha  occ. eigenvalues --   -0.52632  -0.52606  -0.52018  -0.50499  -0.49814
 Alpha  occ. eigenvalues --   -0.49271  -0.47800  -0.47458  -0.47326  -0.47224
 Alpha  occ. eigenvalues --   -0.47175  -0.47143  -0.47098  -0.47030  -0.46997
 Alpha  occ. eigenvalues --   -0.46946  -0.46916  -0.46902  -0.46879  -0.46852
 Alpha  occ. eigenvalues --   -0.46743  -0.46687  -0.46654  -0.46617  -0.46536
 Alpha  occ. eigenvalues --   -0.46518  -0.46479  -0.46406  -0.46329  -0.46226
 Alpha  occ. eigenvalues --   -0.46033  -0.45524  -0.45362  -0.45276  -0.44733
 Alpha  occ. eigenvalues --   -0.44596  -0.44429  -0.44414  -0.44323  -0.44234
 Alpha  occ. eigenvalues --   -0.44186  -0.44096  -0.44080  -0.44020  -0.43963
 Alpha  occ. eigenvalues --   -0.43910  -0.43840  -0.43747  -0.43739  -0.43723
 Alpha  occ. eigenvalues --   -0.43715  -0.43668  -0.43594  -0.43516  -0.43467
 Alpha  occ. eigenvalues --   -0.43436  -0.43364  -0.43305  -0.43264  -0.43237
 Alpha  occ. eigenvalues --   -0.43222  -0.42955  -0.42915  -0.42405  -0.42253
 Alpha  occ. eigenvalues --   -0.42218  -0.42063  -0.42016  -0.41718  -0.41245
 Alpha  occ. eigenvalues --   -0.40909  -0.40428  -0.39735  -0.39600  -0.38158
 Alpha  occ. eigenvalues --   -0.36538  -0.36490  -0.36444  -0.36282  -0.36024
 Alpha  occ. eigenvalues --   -0.35879  -0.35749  -0.35661  -0.35510  -0.35407
 Alpha  occ. eigenvalues --   -0.35271  -0.35044  -0.34996  -0.34837  -0.34642
 Alpha  occ. eigenvalues --   -0.34426  -0.34252  -0.34083  -0.32608  -0.32208
 Alpha  occ. eigenvalues --   -0.31410  -0.30871  -0.30838  -0.30589  -0.30514
 Alpha  occ. eigenvalues --   -0.30441  -0.30249  -0.30194  -0.30178  -0.29101
 Alpha virt. eigenvalues --   -0.08096  -0.07405  -0.07023  -0.06688  -0.06197
 Alpha virt. eigenvalues --   -0.06021  -0.05358  -0.05155  -0.05085  -0.04776
 Alpha virt. eigenvalues --   -0.04711  -0.04304  -0.04192  -0.04106  -0.03773
 Alpha virt. eigenvalues --   -0.03631  -0.03558  -0.03450  -0.03121  -0.03046
 Alpha virt. eigenvalues --   -0.02914  -0.02768  -0.02641  -0.02577  -0.02477
 Alpha virt. eigenvalues --   -0.02422  -0.02302  -0.02110  -0.02025  -0.01823
 Alpha virt. eigenvalues --   -0.01685  -0.01497  -0.01423  -0.01350  -0.01177
 Alpha virt. eigenvalues --   -0.01092  -0.01002  -0.00881  -0.00817  -0.00689
 Alpha virt. eigenvalues --   -0.00572  -0.00389  -0.00305  -0.00059   0.00091
 Alpha virt. eigenvalues --    0.00184   0.00253   0.00413   0.00499   0.00684
 Alpha virt. eigenvalues --    0.00787   0.00857   0.00930   0.01080   0.01137
 Alpha virt. eigenvalues --    0.01248   0.01398   0.01463   0.01478   0.01676
 Alpha virt. eigenvalues --    0.01762   0.01827   0.01990   0.02127   0.02322
 Alpha virt. eigenvalues --    0.02467   0.02586   0.02716   0.02843   0.03003
 Alpha virt. eigenvalues --    0.03142   0.03420   0.03482   0.03640   0.03870
 Alpha virt. eigenvalues --    0.04109   0.04238   0.04478   0.04570   0.04658
 Alpha virt. eigenvalues --    0.04706   0.04892   0.04999   0.05109   0.05147
 Alpha virt. eigenvalues --    0.05296   0.05396   0.05546   0.05635   0.05831
 Alpha virt. eigenvalues --    0.05932   0.05962   0.06050   0.06106   0.06208
 Alpha virt. eigenvalues --    0.06435   0.06561   0.06665   0.06791   0.06869
 Alpha virt. eigenvalues --    0.06964   0.06998   0.07199   0.07324   0.07386
 Alpha virt. eigenvalues --    0.07501   0.07592   0.07797   0.07985   0.08067
 Alpha virt. eigenvalues --    0.08109   0.08287   0.08308   0.08417   0.08487
 Alpha virt. eigenvalues --    0.08623   0.08695   0.08707   0.08803   0.08847
 Alpha virt. eigenvalues --    0.09028   0.09122   0.09330   0.09351   0.09442
 Alpha virt. eigenvalues --    0.09531   0.09590   0.09721   0.09776   0.09852
 Alpha virt. eigenvalues --    0.09927   0.10080   0.10119   0.10311   0.10358
 Alpha virt. eigenvalues --    0.10445   0.10508   0.10656   0.10701   0.10840
 Alpha virt. eigenvalues --    0.10977   0.11166   0.11206   0.11316   0.11514
 Alpha virt. eigenvalues --    0.11694   0.11732   0.11823   0.12029   0.12144
 Alpha virt. eigenvalues --    0.12348   0.12419   0.12496   0.12534   0.12661
 Alpha virt. eigenvalues --    0.12860   0.13089   0.13198   0.13557   0.13684
 Alpha virt. eigenvalues --    0.13861   0.13989   0.14050   0.14337   0.14379
 Alpha virt. eigenvalues --    0.14510   0.14588   0.14719   0.14758   0.14956
 Alpha virt. eigenvalues --    0.14994   0.15112   0.15168   0.15287   0.15409
 Alpha virt. eigenvalues --    0.15456   0.15513   0.15690   0.15754   0.15948
 Alpha virt. eigenvalues --    0.16089   0.16174   0.16416   0.16480   0.16711
 Alpha virt. eigenvalues --    0.16778   0.16971   0.17089   0.17216   0.17330
 Alpha virt. eigenvalues --    0.17482   0.17557   0.17615   0.17757   0.17818
 Alpha virt. eigenvalues --    0.17838   0.17963   0.18067   0.18114   0.18134
 Alpha virt. eigenvalues --    0.18195   0.18249   0.18368   0.18470   0.18565
 Alpha virt. eigenvalues --    0.18622   0.18692   0.18742   0.18884   0.18945
 Alpha virt. eigenvalues --    0.19013   0.19074   0.19148   0.19226   0.19292
 Alpha virt. eigenvalues --    0.19410   0.19472   0.19548   0.19629   0.19728
 Alpha virt. eigenvalues --    0.19824   0.19853   0.19940   0.20035   0.20134
 Alpha virt. eigenvalues --    0.20166   0.20187   0.20313   0.20467   0.20532
 Alpha virt. eigenvalues --    0.20634   0.20674   0.20716   0.20847   0.20963
 Alpha virt. eigenvalues --    0.21102   0.21167   0.21219   0.21423   0.21489
 Alpha virt. eigenvalues --    0.21562   0.21629   0.21732   0.21789   0.21868
 Alpha virt. eigenvalues --    0.21988   0.22080   0.22207   0.22238   0.22346
 Alpha virt. eigenvalues --    0.22413   0.22497   0.22589   0.22668   0.22807
 Alpha virt. eigenvalues --    0.22906   0.22979   0.23026   0.23213   0.23340
 Alpha virt. eigenvalues --    0.23454   0.23551   0.23617   0.23764   0.23829
 Alpha virt. eigenvalues --    0.23909   0.23964   0.24093   0.24187   0.24330
 Alpha virt. eigenvalues --    0.24421   0.24477   0.24537   0.24625   0.24849
 Alpha virt. eigenvalues --    0.24967   0.25112   0.25132   0.25391   0.25442
 Alpha virt. eigenvalues --    0.25494   0.25611   0.25705   0.25729   0.25831
 Alpha virt. eigenvalues --    0.25968   0.26186   0.26373   0.26497   0.26596
 Alpha virt. eigenvalues --    0.26649   0.26761   0.26854   0.26983   0.27125
 Alpha virt. eigenvalues --    0.27138   0.27214   0.27345   0.27545   0.27631
 Alpha virt. eigenvalues --    0.27692   0.27717   0.27777   0.27886   0.28136
 Alpha virt. eigenvalues --    0.28363   0.28434   0.28508   0.28642   0.28682
 Alpha virt. eigenvalues --    0.28765   0.28890   0.29040   0.29107   0.29295
 Alpha virt. eigenvalues --    0.29534   0.29638   0.29780   0.29901   0.30002
 Alpha virt. eigenvalues --    0.30099   0.30455   0.30632   0.30681   0.30832
 Alpha virt. eigenvalues --    0.31024   0.31136   0.31382   0.31744   0.31763
 Alpha virt. eigenvalues --    0.31880   0.31955   0.32054   0.32396   0.32560
 Alpha virt. eigenvalues --    0.32755   0.33092   0.33223   0.33523   0.33678
 Alpha virt. eigenvalues --    0.33799   0.34314   0.34732   0.34906   0.35016
 Alpha virt. eigenvalues --    0.35621   0.35706   0.35783   0.36157   0.36578
 Alpha virt. eigenvalues --    0.36730   0.36917   0.37203   0.37368   0.37564
 Alpha virt. eigenvalues --    0.37627   0.38115   0.38190   0.38316   0.38763
 Alpha virt. eigenvalues --    0.39094   0.39209   0.39452   0.39545   0.39850
 Alpha virt. eigenvalues --    0.40219   0.40583   0.40981   0.41304   0.41409
 Alpha virt. eigenvalues --    0.41803   0.42043   0.42617   0.42686   0.42954
 Alpha virt. eigenvalues --    0.43413   0.43958   0.45108   0.46161   0.46814
 Alpha virt. eigenvalues --    0.47008   0.47270   0.48025   0.48149   0.48762
 Alpha virt. eigenvalues --    0.49033   0.49674   0.49945   0.50638   0.50815
 Alpha virt. eigenvalues --    0.50931   0.51324   0.51950   0.52317   0.52468
 Alpha virt. eigenvalues --    0.53207   0.53611   0.54405   0.54951   0.55791
 Alpha virt. eigenvalues --    0.56204   0.57119   0.57427   0.57659   0.58614
 Alpha virt. eigenvalues --    0.58803   0.59734   0.59839   0.59996   0.60382
 Alpha virt. eigenvalues --    0.60718   0.60830   0.60892   0.61077   0.61103
 Alpha virt. eigenvalues --    0.61278   0.61400   0.61477   0.61767   0.62019
 Alpha virt. eigenvalues --    0.62044   0.62099   0.62171   0.62431   0.62562
 Alpha virt. eigenvalues --    0.62732   0.62750   0.63028   0.63119   0.63305
 Alpha virt. eigenvalues --    0.63462   0.63476   0.63764   0.63867   0.64026
 Alpha virt. eigenvalues --    0.64374   0.64443   0.64737   0.64884   0.65107
 Alpha virt. eigenvalues --    0.65352   0.65504   0.65609   0.65996   0.66078
 Alpha virt. eigenvalues --    0.66531   0.66787   0.66915   0.67355   0.67638
 Alpha virt. eigenvalues --    0.67892   0.68179   0.68363   0.68675   0.69136
 Alpha virt. eigenvalues --    0.69347   0.69476   0.69750   0.70293   0.70488
 Alpha virt. eigenvalues --    0.70796   0.71012   0.71640   0.71768   0.72041
 Alpha virt. eigenvalues --    0.72144   0.72462   0.73095   0.73602   0.73867
 Alpha virt. eigenvalues --    0.74071   0.74136   0.74456   0.74587   0.74769
 Alpha virt. eigenvalues --    0.74929   0.74979   0.75232   0.75697   0.75932
 Alpha virt. eigenvalues --    0.76681   0.76847   0.77144   0.77820   0.78057
 Alpha virt. eigenvalues --    0.78385   0.78542   0.78677   0.78991   0.79169
 Alpha virt. eigenvalues --    0.79294   0.79530   0.79728   0.80190   0.80409
 Alpha virt. eigenvalues --    0.81076   0.81627   0.85123   0.87670   0.87711
 Alpha virt. eigenvalues --    0.87996   0.88221   0.88727   0.88944   0.89107
 Alpha virt. eigenvalues --    0.89200   0.89476   0.89681   0.89855   0.90084
 Alpha virt. eigenvalues --    0.90248   0.90391   0.90537   0.90618   0.90913
 Alpha virt. eigenvalues --    0.91032   0.91104   0.91352   0.91501   0.91627
 Alpha virt. eigenvalues --    0.91753   0.91864   0.92193   0.92244   0.92357
 Alpha virt. eigenvalues --    0.92707   0.92852   0.93123   0.93514   0.94027
 Alpha virt. eigenvalues --    0.94145   0.94173   0.94426   0.94597   0.94842
 Alpha virt. eigenvalues --    0.94941   0.95088   0.95160   0.95261   0.95303
 Alpha virt. eigenvalues --    0.95498   0.95591   0.95719   0.95882   0.96044
 Alpha virt. eigenvalues --    0.96207   0.96390   0.96439   0.96616   0.96804
 Alpha virt. eigenvalues --    0.97007   0.97257   0.97424   0.97652   0.97766
 Alpha virt. eigenvalues --    0.97965   0.98313   0.98789   0.99325   0.99479
 Alpha virt. eigenvalues --    0.99713   0.99832   0.99855   0.99952   1.00072
 Alpha virt. eigenvalues --    1.00343   1.00468   1.00623   1.00693   1.00790
 Alpha virt. eigenvalues --    1.00837   1.00960   1.01309   1.01529   1.01652
 Alpha virt. eigenvalues --    1.01805   1.02333   1.03376   1.05185   1.05232
 Alpha virt. eigenvalues --    1.05463   1.05634   1.05759   1.05917   1.06007
 Alpha virt. eigenvalues --    1.06086   1.06259   1.06652   1.06783   1.07225
 Alpha virt. eigenvalues --    1.07642   1.07720   1.08124   1.08527   1.08703
 Alpha virt. eigenvalues --    1.08995   1.09346   1.09596   1.09757   1.09983
 Alpha virt. eigenvalues --    1.10288   1.10668   1.10845   1.10926   1.11382
 Alpha virt. eigenvalues --    1.11618   1.11835   1.11856   1.12159   1.12457
 Alpha virt. eigenvalues --    1.12512   1.12797   1.12892   1.13168   1.13431
 Alpha virt. eigenvalues --    1.13659   1.13865   1.13939   1.14406   1.14539
 Alpha virt. eigenvalues --    1.14746   1.14955   1.15115   1.15426   1.15612
 Alpha virt. eigenvalues --    1.16097   1.16288   1.16476   1.16661   1.16870
 Alpha virt. eigenvalues --    1.17082   1.17729   1.17919   1.18264   1.18440
 Alpha virt. eigenvalues --    1.18548   1.19078   1.19261   1.19392   1.19749
 Alpha virt. eigenvalues --    1.19982   1.20053   1.20287   1.20775   1.21300
 Alpha virt. eigenvalues --    1.21421   1.21508   1.21826   1.22092   1.22186
 Alpha virt. eigenvalues --    1.22564   1.22934   1.23248   1.23460   1.23699
 Alpha virt. eigenvalues --    1.23830   1.24103   1.24277   1.24556   1.24898
 Alpha virt. eigenvalues --    1.25034   1.25312   1.25346   1.25633   1.25951
 Alpha virt. eigenvalues --    1.26155   1.26334   1.26784   1.26952   1.27072
 Alpha virt. eigenvalues --    1.27306   1.27656   1.27795   1.28116   1.28255
 Alpha virt. eigenvalues --    1.28422   1.28711   1.29179   1.29540   1.29785
 Alpha virt. eigenvalues --    1.29899   1.29918   1.30310   1.30453   1.30651
 Alpha virt. eigenvalues --    1.30966   1.31089   1.31446   1.31581   1.31806
 Alpha virt. eigenvalues --    1.32075   1.32562   1.32625   1.32799   1.33004
 Alpha virt. eigenvalues --    1.33119   1.33247   1.33575   1.33694   1.33846
 Alpha virt. eigenvalues --    1.34174   1.34276   1.34473   1.35024   1.35050
 Alpha virt. eigenvalues --    1.35501   1.35643   1.35963   1.36194   1.36329
 Alpha virt. eigenvalues --    1.36740   1.36886   1.36954   1.37189   1.37222
 Alpha virt. eigenvalues --    1.37335   1.37484   1.37550   1.37607   1.37766
 Alpha virt. eigenvalues --    1.37837   1.37893   1.38092   1.38104   1.38220
 Alpha virt. eigenvalues --    1.38315   1.38457   1.38572   1.38616   1.38672
 Alpha virt. eigenvalues --    1.38924   1.39062   1.39318   1.39396   1.39703
 Alpha virt. eigenvalues --    1.40023   1.40105   1.40573   1.41019   1.41063
 Alpha virt. eigenvalues --    1.41381   1.41701   1.41787   1.42023   1.42081
 Alpha virt. eigenvalues --    1.42563   1.42828   1.42966   1.43116   1.43429
 Alpha virt. eigenvalues --    1.43689   1.43999   1.44197   1.44540   1.44636
 Alpha virt. eigenvalues --    1.45106   1.45313   1.45759   1.45785   1.46140
 Alpha virt. eigenvalues --    1.46577   1.47345   1.47489   1.48146   1.48366
 Alpha virt. eigenvalues --    1.48760   1.48868   1.49211   1.49885   1.50485
 Alpha virt. eigenvalues --    1.51860   1.52803   1.54436   1.55475   1.56149
 Alpha virt. eigenvalues --    1.56884   1.57315   1.57837   1.58783   1.58979
 Alpha virt. eigenvalues --    1.59347   1.60629   1.61622   1.61965   1.64101
 Alpha virt. eigenvalues --    1.65120   1.65185   1.65844   1.66883   1.67483
 Alpha virt. eigenvalues --    1.67900   1.68050   1.68197   1.68234   1.68443
 Alpha virt. eigenvalues --    1.68484   1.68590   1.68618   1.68631   1.68920
 Alpha virt. eigenvalues --    1.69262   1.69609   1.70045   1.70315   1.70478
 Alpha virt. eigenvalues --    1.70935   1.71388   1.71672   1.72020   1.72079
 Alpha virt. eigenvalues --    1.72471   1.72573   1.73043   1.73283   1.73429
 Alpha virt. eigenvalues --    1.73782   1.73888   1.74166   1.74451   1.74874
 Alpha virt. eigenvalues --    1.75132   1.75612   1.75693   1.75960   1.76156
 Alpha virt. eigenvalues --    1.76726   1.76937   1.77477   1.77864   1.78034
 Alpha virt. eigenvalues --    1.78479   1.79017   1.79597   1.79823   1.80634
 Alpha virt. eigenvalues --    1.80959   1.81236   1.81559   1.81771   1.82822
 Alpha virt. eigenvalues --    1.83176   1.83393   1.83561   1.83774   1.83893
 Alpha virt. eigenvalues --    1.84026   1.84238   1.84334   1.84365   1.84443
 Alpha virt. eigenvalues --    1.84560   1.84710   1.84756   1.84814   1.84929
 Alpha virt. eigenvalues --    1.85046   1.85151   1.85236   1.85414   1.85601
 Alpha virt. eigenvalues --    1.86000   1.86377   1.86680   1.86984   1.87583
 Alpha virt. eigenvalues --    1.87639   1.88115   1.88215   1.88739   1.89068
 Alpha virt. eigenvalues --    1.89728   1.89938   1.90532   1.90962   1.91116
 Alpha virt. eigenvalues --    1.91300   1.91493   1.91629   1.91710   1.91788
 Alpha virt. eigenvalues --    1.91883   1.92042   1.92120   1.92589   1.92707
 Alpha virt. eigenvalues --    1.93085   1.93374   1.93924   1.94646   1.95033
 Alpha virt. eigenvalues --    1.95454   1.95708   1.95827   1.95999   1.96204
 Alpha virt. eigenvalues --    1.96270   1.96364   1.96458   1.96545   1.96706
 Alpha virt. eigenvalues --    1.96803   1.96968   1.97134   1.97180   1.97398
 Alpha virt. eigenvalues --    1.97495   1.97817   1.97890   1.98153   1.98596
 Alpha virt. eigenvalues --    1.98875   2.00073   2.00606   2.01065   2.01868
 Alpha virt. eigenvalues --    2.02457   2.02812   2.02995   2.03498   2.04793
 Alpha virt. eigenvalues --    2.05270   2.05970   2.07357   2.08052   2.08423
 Alpha virt. eigenvalues --    2.08982   2.09167   2.09377   2.09608   2.09919
 Alpha virt. eigenvalues --    2.10034   2.10502   2.10647   2.11047   2.11196
 Alpha virt. eigenvalues --    2.11336   2.11652   2.11710   2.12127   2.12337
 Alpha virt. eigenvalues --    2.12388   2.12584   2.12973   2.13271   2.13480
 Alpha virt. eigenvalues --    2.13717   2.15258   2.15473   2.15707   2.15808
 Alpha virt. eigenvalues --    2.15903   2.16296   2.16462   2.16551   2.16798
 Alpha virt. eigenvalues --    2.17273   2.18249   2.18409   2.18528   2.18576
 Alpha virt. eigenvalues --    2.18661   2.18922   2.19125   2.19190   2.19248
 Alpha virt. eigenvalues --    2.19559   2.19746   2.20201   2.20420   2.20521
 Alpha virt. eigenvalues --    2.20682   2.20764   2.20864   2.20932   2.21002
 Alpha virt. eigenvalues --    2.21074   2.21162   2.21176   2.21257   2.21327
 Alpha virt. eigenvalues --    2.21331   2.21416   2.21537   2.21572   2.21643
 Alpha virt. eigenvalues --    2.21690   2.21739   2.21751   2.21843   2.21930
 Alpha virt. eigenvalues --    2.22045   2.22147   2.22298   2.22469   2.22615
 Alpha virt. eigenvalues --    2.22825   2.30691   2.40520   2.41469   2.42316
 Alpha virt. eigenvalues --    2.42644   2.42931   2.43829   2.44671   2.45943
 Alpha virt. eigenvalues --    2.47043   2.47297   2.48556   2.48842   2.49127
 Alpha virt. eigenvalues --    2.49451   2.49678   2.49913   2.49980   2.50269
 Alpha virt. eigenvalues --    2.50435   2.50489   2.50529   2.50662   2.50811
 Alpha virt. eigenvalues --    2.51387   2.51643   2.51770   2.51953   2.52036
 Alpha virt. eigenvalues --    2.52117   2.52157   2.52219   2.52263   2.52341
 Alpha virt. eigenvalues --    2.52418   2.52468   2.52494   2.52600   2.52609
 Alpha virt. eigenvalues --    2.52702   2.52712   2.52884   2.53218   2.53502
 Alpha virt. eigenvalues --    2.53635   2.53708   2.54396   2.54776   2.55977
 Alpha virt. eigenvalues --    2.56689   2.57265   2.61790   2.66619   2.66863
 Alpha virt. eigenvalues --    2.66981   2.67486   2.67836   2.68204   2.68561
 Alpha virt. eigenvalues --    2.68676   2.69027   2.69430   2.69600   2.69830
 Alpha virt. eigenvalues --    2.70041   2.70331   2.70546   2.70663   2.70782
 Alpha virt. eigenvalues --    2.71460   2.71658   2.71872   2.72091   2.72127
 Alpha virt. eigenvalues --    2.72295   2.72321   2.72457   2.72720   2.72822
 Alpha virt. eigenvalues --    2.73019   2.73147   2.73220   2.73336   2.73442
 Alpha virt. eigenvalues --    2.73627   2.73659   2.73961   2.74143   2.74374
 Alpha virt. eigenvalues --    2.74425   2.74527   2.74742   2.75807   4.11698
 Alpha virt. eigenvalues --    4.13974   4.14408   4.14563   4.15009   4.15803
 Alpha virt. eigenvalues --    4.15924   4.15993   4.16205   4.17097   4.17975
 Alpha virt. eigenvalues --    4.20933   4.23974   4.24274   4.25211   4.25956
 Alpha virt. eigenvalues --    4.26910   4.27028   4.27267   4.27600   4.27746
 Alpha virt. eigenvalues --    4.27986   4.28343   4.28500   4.28627   4.28680
 Alpha virt. eigenvalues --    4.28779   4.29011   4.29212   4.29712   4.29814
 Alpha virt. eigenvalues --    4.30028   4.30728   4.32206   4.33033   4.33444
 Alpha virt. eigenvalues --    4.34874   4.36226   4.38040   4.38839   4.39699
 Alpha virt. eigenvalues --    4.40397   4.40647   4.41301   4.41680   4.42127
 Alpha virt. eigenvalues --    4.42477   4.44370   4.44618   4.45781   4.47695
 Alpha virt. eigenvalues --    4.49841   4.50981   4.52588   4.54076   4.55096
 Alpha virt. eigenvalues --    4.56907   4.59507   4.60622   4.70643   4.75421
          Condensed to atoms (all electrons):
 Mulliken atomic charges:
              1
     1  H    0.639062
     2  H    0.625252
     3  H    0.693187
     4  H    0.651017
     5  H    0.682477
     6  H    0.663898
     7  H    0.656935
     8  H    0.700423
     9  H    0.660025
    10  H    0.622317
    11  H    0.624354
    12  H    0.633246
    13  H    0.632427
    14  H    0.627328
    15  H    0.609385
    16  H    0.616371
    17  H    0.636443
    18  H    0.616758
    19  H    0.613720
    20  H    0.595555
    21  H    0.627006
    22  H    0.709141
    23  H    0.692973
    24  H    0.640570
    25  H    0.636404
    26  H    0.618909
    27  H    0.661499
    28  H    0.645567
    29  H    0.621696
    30  H    0.673053
    31  H    0.659430
    32  H    0.619924
    33  H    0.588008
    34  H    0.206499
    35  H    0.226522
    36  H    0.210145
    37  H    0.204288
    38  H    0.215713
    39  H    0.236250
    40  H    0.208078
    41  H    0.211772
    42  H    0.208515
    43  H    0.208333
    44  H    0.209070
    45  H    0.206683
    46  H    0.243710
    47  H    0.204130
    48  H    0.211533
    49  H    0.206542
    50  H    0.230586
    51  H    0.207972
    52  H    0.213538
    53  H    0.206607
    54  H    0.207845
    55  H    0.206264
    56  H    0.220836
    57  H    0.206929
    58  H    0.235140
    59  H    0.200243
    60  H    0.242822
    61  H    0.206376
    62  H    0.222922
    63  H    0.213010
    64  H    0.204943
    65  H    0.212428
    66  H    0.224732
    67  H    0.206178
    68  H    0.202244
    69  H    0.218367
    70  H    0.211708
    71  H    0.207656
    72  H    0.206124
    73  H    0.206344
    74  H    0.223772
    75  H    0.203996
    76  H    0.237334
    77  H    0.204299
    78  H    0.226832
    79  H    0.202383
    80  H    0.210797
    81  H    0.228637
    82  H    0.203039
    83  H    0.205483
    84  H    0.208411
    85  H    0.200978
    86  H    0.236383
    87  H    0.216319
    88  H    0.204528
    89  H    0.217017
    90  H    0.226900
    91  H    0.205218
    92  H    0.207941
    93  H    0.218335
    94  H    0.206113
    95  H    0.222079
    96  H    0.207066
    97  H    0.206024
    98  H    0.229627
    99  H    0.210409
   100  H    0.204794
   101  H    0.207010
   102  H    0.210714
   103  H    0.243330
   104  H    0.203429
   105  H    0.209537
   106  H    0.204613
   107  H    0.205995
   108  H    0.216998
   109  H    0.207456
   110  H    0.220166
   111  H    0.206451
   112  H    0.227121
   113  H    0.204250
   114  H    0.232257
   115  H    0.631998
   116  H    0.627183
   117  H    0.649083
   118  H    0.631554
   119  H    0.647848
   120  H    0.642041
   121  H    0.626441
   122  H    0.630478
   123  H    0.639218
   124  H    0.314444
   125  H    0.228033
   126  H    0.229501
   127  H    0.242098
   128  H    0.251860
   129  H    0.238009
   130  H    0.329835
   131  H    0.219379
   132  H    0.226011
   133  H    0.624800
   134  C   -0.484591
   135  C   -0.488397
   136  C   -0.478308
   137  C   -0.481466
   138  C   -0.463730
   139  C   -0.450440
   140  C   -0.461431
   141  C   -0.529734
   142  C   -0.481674
   143  C   -0.473487
   144  C   -0.456027
   145  C   -0.471238
   146  C   -0.452487
   147  C   -0.508238
   148  C   -0.471250
   149  C   -0.464335
   150  C   -0.478945
   151  C   -0.463793
   152  C   -0.462386
   153  C   -0.495493
   154  C   -0.471555
   155  C   -0.461280
   156  C   -0.491993
   157  C   -0.446535
   158  C   -0.460046
   159  C   -0.517918
   160  C   -0.448747
   161  C   -0.480062
   162  C   -0.428297
   163  C   -0.457604
   164  N   -0.530411
   165  N   -0.523145
   166  N   -0.525169
   167  N   -0.520868
   168  N   -0.512756
   169  N   -0.526799
   170  N   -0.522583
   171  N   -0.518755
   172  N   -0.536603
   173  N   -0.661526
   174  O   -1.165418
   175  O   -1.352445
   176  O   -1.316072
   177  O   -1.378930
   178  O   -1.395028
   179  O   -1.224847
   180  O   -1.221709
   181  O   -1.217715
   182  O   -1.198304
   183  O   -1.264379
   184  O   -1.238380
   185  O   -1.185210
   186  O   -1.240527
   187  O   -1.347605
   188  O   -1.216065
   189  O   -1.250737
   190  O   -1.305223
   191  O   -1.279183
   192  O   -1.236956
   193  O   -1.374190
   194  O   -1.168782
 Sum of Mulliken atomic charges =   1.00000
 Mulliken charges with hydrogens summed into heavy atoms:
              1
   134  C    0.171660
   135  C    0.139968
   136  C    0.145778
   137  C    0.177907
   138  C    0.181370
   139  C    0.177550
   140  C    0.172597
   141  C    0.148471
   142  C    0.160633
   143  C    0.168615
   144  C    0.170762
   145  C    0.154249
   146  C    0.181624
   147  C    0.160227
   148  C    0.170566
   149  C    0.152598
   150  C    0.174735
   151  C    0.184653
   152  C    0.169108
   153  C    0.139764
   154  C    0.174505
   155  C    0.161238
   156  C    0.164303
   157  C    0.181071
   158  C    0.174027
   159  C    0.145710
   160  C    0.194419
   161  C    0.291916
   162  C    0.303671
   163  C    0.317621
   164  N   -0.530411
   165  N   -0.523145
   166  N   -0.525169
   167  N   -0.520868
   168  N   -0.512756
   169  N   -0.526799
   170  N   -0.522583
   171  N   -0.518755
   172  N   -0.536603
   173  N   -0.036726
   174  O    0.098896
   175  O   -0.008241
   176  O    0.015489
   177  O   -0.058097
   178  O   -0.034580
   179  O    0.023911
   180  O    0.035891
   181  O    0.042039
   182  O    0.027452
   183  O    0.011281
   184  O    0.005560
   185  O    0.024064
   186  O    0.016957
   187  O    0.054508
   188  O    0.060910
   189  O   -0.000274
   190  O    0.004124
   191  O    0.008426
   192  O    0.016738
   193  O   -0.041707
   194  O    0.039149
 Sum of Mulliken charges with hydrogens summed into heavy atoms =   1.00000
 Electronic spatial extent (au):  <R**2>=          70053.1947
 Charge=              1.0000 electrons
 Dipole moment (field-independent basis, Debye):
    X=             -3.9393    Y=             -0.3740    Z=              4.0934  Tot=              5.6933
 Quadrupole moment (field-independent basis, Debye-Ang):
   XX=           -256.0773   YY=           -287.2832   ZZ=           -306.0478
   XY=              3.8010   XZ=             31.9925   YZ=              3.1701
 Traceless Quadrupole moment (field-independent basis, Debye-Ang):
   XX=             27.0588   YY=             -4.1471   ZZ=            -22.9117
   XY=              3.8010   XZ=             31.9925   YZ=              3.1701
 Octapole moment (field-independent basis, Debye-Ang**2):
  XXX=           -109.0588  YYY=            -56.0520  ZZZ=             49.3032  XYY=            -20.0710
  XXY=             59.1847  XXZ=           -231.1634  XZZ=           -132.9571  YZZ=            -11.7297
  YYZ=              6.5366  XYZ=            -55.8892
 Hexadecapole moment (field-independent basis, Debye-Ang**3):
 XXXX=         -29594.3106 YYYY=         -27757.3001 ZZZZ=         -23543.8065 XXXY=            265.6309
 XXXZ=            707.8662 YYYX=             -7.7378 YYYZ=           -166.2241 ZZZX=            708.5641
 ZZZY=            191.0337 XXYY=          -9284.1094 XXZZ=          -7655.7904 YYZZ=          -9048.8309
 XXYZ=            165.1501 YYXZ=            280.4548 ZZXY=             32.2854
 N-N= 1.247440067927D+04 E-N=-3.274063041525D+04  KE= 3.318886829064D+03
 1\1\GINC-NODE220\SP\RB3LYP\6-31+G(d)\C30H133N10O21(1+)\P253081\27-Jun-
 2014\0\\# sp b3lyp/6-31+g*\\something\\1,1\H,0,-2.5587,-2.48268,-0.424
 06\H,0,-2.27799,-2.65749,-1.94426\H,0,-0.163098,0.18644,-1.69385\H,0,0
 .865175,0.391284,-2.84679\H,0,-0.286244,-3.0544,0.986494\H,0,-0.17245,
 2.52296,1.91407\H,0,-0.53196,3.14494,0.471052\H,0,-1.0895,-1.14537,0.5
 15113\H,0,-1.91463,-1.66172,1.75148\H,0,0.978976,3.68753,-1.08603\H,0,
 2.60437,2.24941,-1.68424\H,0,2.76763,2.80964,-0.220766\H,0,0.809894,-0
 .949595,3.55738\H,0,0.529653,0.589932,3.74423\H,0,-1.10098,1.69639,-2.
 86734\H,0,-1.09713,3.02833,-2.0648\H,0,2.53527,-2.23846,-1.65017\H,0,1
 .45713,-2.79056,2.18785\H,0,-2.96054,0.560965,2.23013\H,0,-2.49215,1.9
 0196,1.59702\H,0,2.94394,-0.0602283,-2.41462\H,0,-0.402729,1.0075,0.42
 4104\H,0,0.838253,0.0071576,0.307257\H,0,1.0888,-3.52245,-0.688114\H,0
 ,0.562651,-3.1319,-2.12167\H,0,1.84027,2.30529,2.66699\H,0,3.00868,1.2
 2039,1.21108\H,0,-0.595832,-1.45143,-2.94214\H,0,-1.36831,-0.610791,3.
 56244\H,0,2.86675,-0.816529,-0.0559691\H,0,2.41768,-1.01366,1.47813\H,
 0,-2.76067,1.45901,-1.57417\H,0,-3.23098,0.996274,-0.130158\H,0,6.5403
 7,-4.29712,-3.00774\H,0,4.77133,-4.12778,-3.20078\H,0,5.84227,-2.77925
 ,-3.63939\H,0,6.05878,-4.84026,-0.519902\H,0,5.08273,-3.64472,0.382691
 \H,0,4.32413,-4.61218,-0.896501\H,0,7.63891,-2.87568,-1.14234\H,0,6.87
 393,-1.45429,-1.90582\H,0,6.548,-1.8223,-0.198078\H,0,5.19108,-4.00122
 ,5.41022\H,0,4.31111,-4.67077,4.00856\H,0,5.24992,-3.17201,3.83022\H,0
 ,2.85684,-1.08311,5.59984\H,0,4.28983,-1.79729,6.40171\H,0,4.41954,-1.
 11134,4.75726\H,0,2.93613,-3.96348,6.65609\H,0,1.58833,-3.10692,5.8516
 2\H,0,2.19738,-4.63427,5.17518\H,0,-2.15694,-5.73523,2.00439\H,0,-1.75
 059,-7.47398,2.05583\H,0,-0.849297,-6.30728,3.06355\H,0,0.517385,-8.16
 309,1.02593\H,0,1.52118,-6.84585,0.355031\H,0,1.26806,-6.96016,2.11162
 \H,0,-0.245497,-6.05825,-1.06943\H,0,-1.38562,-7.31589,-0.500542\H,0,-
 1.80445,-5.57905,-0.37782\H,0,-1.49386,-5.34293,-6.28576\H,0,-0.738505
 ,-5.31039,-4.66648\H,0,-2.43604,-4.82553,-4.85868\H,0,0.397423,-3.7818
 6,-7.0554\H,0,0.624659,-2.27063,-6.12918\H,0,1.02414,-3.83181,-5.38117
 \H,0,-2.06829,-3.05788,-7.34167\H,0,-2.97446,-2.69659,-5.84652\H,0,-1.
 67629,-1.60648,-6.37567\H,0,2.34759,0.580228,-6.34042\H,0,3.76433,1.24
 07,-7.20384\H,0,3.95256,-0.142169,-6.08976\H,0,5.5213,2.48095,-5.76316
 \H,0,5.18986,2.57264,-4.00914\H,0,5.59261,1.00892,-4.75495\H,0,3.01688
 ,3.5529,-4.35857\H,0,3.2037,3.52191,-6.13793\H,0,1.81507,2.71217,-5.35
 679\H,0,-0.428445,7.82384,-3.21682\H,0,0.977437,6.75203,-2.95716\H,0,-
 0.570107,6.06378,-3.49713\H,0,-0.132825,8.58563,-0.770275\H,0,-0.10596
 1,7.30276,0.471178\H,0,1.24714,7.45628,-0.671598\H,0,-2.3827,7.5987,-1
 .56557\H,0,-2.40131,5.85151,-1.94599\H,0,-2.20638,6.38642,-0.264898\H,
 0,-4.83623,-0.764479,6.91653\H,0,-3.17395,-0.240862,6.52202\H,0,-4.531
 39,0.30415,5.51569\H,0,-3.96386,-3.19351,6.72791\H,0,-3.13985,-3.62813
 ,5.20363\H,0,-2.36643,-2.49781,6.33387\H,0,-5.95672,-2.40199,5.27395\H
 ,0,-5.58177,-1.22358,3.98476\H,0,-4.99414,-2.89713,3.85321\H,0,6.71093
 ,4.80041,1.81138\H,0,5.08709,4.81713,1.06437\H,0,5.25313,4.57199,2.817
 27\H,0,6.44825,1.14379,2.53286\H,0,7.5501,2.53788,2.71054\H,0,6.04224,
 2.45372,3.66313\H,0,5.61332,3.03558,-0.45774\H,0,7.28915,2.9098,0.1618
 37\H,0,6.21248,1.48362,0.160374\H,0,2.64659,4.2373,5.80457\H,0,1.46374
 ,4.57378,7.09885\H,0,1.74372,2.89758,6.54723\H,0,1.55145,5.70683,4.244
 31\H,0,-0.162004,5.45864,3.84409\H,0,0.289705,6.15907,5.42453\H,0,-0.5
 87056,2.5737,6.01463\H,0,-1.01411,4.2328,6.52842\H,0,-1.3962,3.66847,4
 .87571\H,0,-2.84652,-1.156,3.93907\H,0,2.50138,-2.49204,3.41197\H,0,0.
 212697,-4.57609,1.08733\H,0,0.965388,2.93452,3.88923\H,0,4.05482,2.389
 85,1.59018\H,0,-0.930216,-2.72224,-3.88275\H,0,-0.0741093,4.92362,-1.1
 0054\H,0,3.00444,1.01763,-3.63244\H,0,4.12411,-2.04362,-1.57903\H,0,-5
 .11473,-0.0561723,-0.089264\H,0,-6.77985,-0.709595,-0.25334\H,0,-5.507
 43,-1.6772,0.554912\H,0,-5.74719,-3.24174,-2.75457\H,0,-5.88196,-3.527
 04,-1.00436\H,0,-7.15709,-2.59586,-1.85815\H,0,-4.86554,0.286277,-2.41
 393\H,0,-5.10681,-1.05395,-3.58157\H,0,-6.52919,-0.323589,-2.77642\H,0
 ,-4.30623,-1.86063,-1.47325\C,0,5.24411,-4.09918,-0.599992\C,0,6.72005
 ,-2.26414,-1.18506\C,0,4.60768,-3.74291,4.50858\C,0,3.76722,-1.66785,5
 .43768\C,0,2.48739,-3.70676,5.68018\C,0,-1.33414,-6.45162,2.09241\C,0,
 0.794593,-7.09917,1.13371\C,0,-0.988188,-6.30439,-0.304549\C,0,-1.4463
 9,-4.79858,-5.32595\C,0,0.327479,-3.32157,-6.05377\C,0,-1.98662,-2.654
 47,-6.31675\C,0,3.41665,0.798819,-6.25305\C,0,5.06406,1.95657,-4.90514
 \C,0,2.88003,2.94203,-5.25587\C,0,-0.11088,6.82709,-2.86126\C,0,0.1608
 73,7.54078,-0.563496\C,0,-1.9529,6.61579,-1.30441\C,0,-4.13617,-0.5370
 23,6.09318\C,0,-3.32518,-2.81335,5.91088\C,0,-5.18912,-2.07499,4.54987
 \C,0,5.70131,4.35358,1.84236\C,0,6.49039,2.22653,2.69034\C,0,6.24806,2
 .56885,0.301496\C,0,1.67775,3.94005,6.21968\C,0,0.575526,5.42335,4.651
 88\C,0,-0.66123,3.61442,5.68441\C,0,5.68928,-3.59776,-2.92834\C,0,-5.7
 1379,-0.95296,-0.236104\C,0,-6.08731,-2.81781,-1.80785\C,0,-5.47278,-0
 .584035,-2.66617\N,0,-3.94005,-1.68705,5.20676\N,0,3.41612,-2.9561,4.8
 3032\N,0,-0.365513,-6.21276,1.02137\N,0,0.645001,4.06195,5.1886\N,0,5.
 73656,2.90321,1.63421\N,0,-1.02786,-3.40599,-5.50424\N,0,-0.496054,6.5
 9545,-1.46673\N,0,3.63876,1.69363,-5.11595\N,0,5.54926,-3.04981,-1.576
 74\N,0,-5.3324,-1.56149,-1.54597\O,0,-2.99045,-2.78962,-1.26493\O,0,-0
 .0864316,0.168263,-2.68566\O,0,0.531222,-3.62643,1.00701\O,0,-0.820054
 ,2.49443,1.16512\O,0,-1.56236,-1.9509,0.866931\O,0,0.026236,3.93904,-0
 .944286\O,0,2.60184,3.08189,-1.1545\O,0,0.244866,-0.305818,4.04688\O,0
 ,-1.67217,2.46013,-2.62774\O,0,3.25342,-1.54524,-1.55229\O,0,1.92065,-
 2.08027,2.70553\O,0,-3.27157,1.30734,1.66905\O,0,2.56936,0.78951,-2.75
 777\O,0,-0.0999738,0.146369,0.0230526\O,0,1.36436,-3.44857,-1.6352\O,0
 ,0.989841,2.23392,3.17083\O,0,3.08531,2.18182,1.44558\O,0,-0.851942,-2
 .41478,-2.93268\O,0,-2.26699,-0.833466,3.18884\O,0,2.51497,-0.347795,0
 .747763\O,0,-3.29716,0.786473,-1.08972\\Version=AM64L-G09RevC.01\State
 =1-A\HF=-3350.657702\RMSD=7.781e-09\Dipole=0.4869635,-2.1681797,0.2813
 259\Quadrupole=13.9357997,-11.3103013,-2.6254985,25.9345985,4.0650177,
 8.8235125\PG=C01 [X(C30H133N10O21)]\\@


 WE ARE PERHAPS NOT FAR REMOVED FROM THE TIME WHEN WE SHALL BE ABLE TO SUBMIT
 THE BULK OF CHEMICAL PHENOMENA TO CALCULATION.

            -- JOSEPH LOUIS GAY-LUSSAC
               MEMOIRES DE LA SOCIETE D'ARCUEIL, 2, 207 (1808)
 Job cpu time:  0 days  7 hours 18 minutes 21.6 seconds.
 File lengths (MBytes):  RWF=   1045 Int=      0 D2E=      0 Chk=     71 Scr=      1
 Normal termination of Gaussian 09 at Fri Jun 27 14:17:03 2014.
